# Supplementary material for: Tuning the selectivity in iridium-catalyzed acceptorless dehydrogenative coupling of primary alcohols
Source: Royal Society of Chemistry journal article supplement (doi:10.1039/d2ob01142e), 2022-01-01
Supplement: d2ob01142e1.pdf [file d2ob01142e1.pdf]

## Supporting Information

# Tuning the Selectivity in Iridium-Catalyzed Acceptorless Dehydrogenative Coupling of Primary Alcohols

Nihal S. Tabasi, Sertaç Genç, Derya Gülcemal\*

Ege University, Chemistry Department, 35100 Bornova, Izmir, Turkey

\* E-mail: [derya.gulcemal@ege.edu.tr](mailto:derya.gulcemal@ege.edu.tr)

### Table of Contents

|                                                                                     |    |
|-------------------------------------------------------------------------------------|----|
| GC traces to confirm H <sub>2</sub> evolution .....                                 | S2 |
| Traces of <sup>1</sup> H and <sup>13</sup> C NMR spectra of isolated products ..... | S3 |

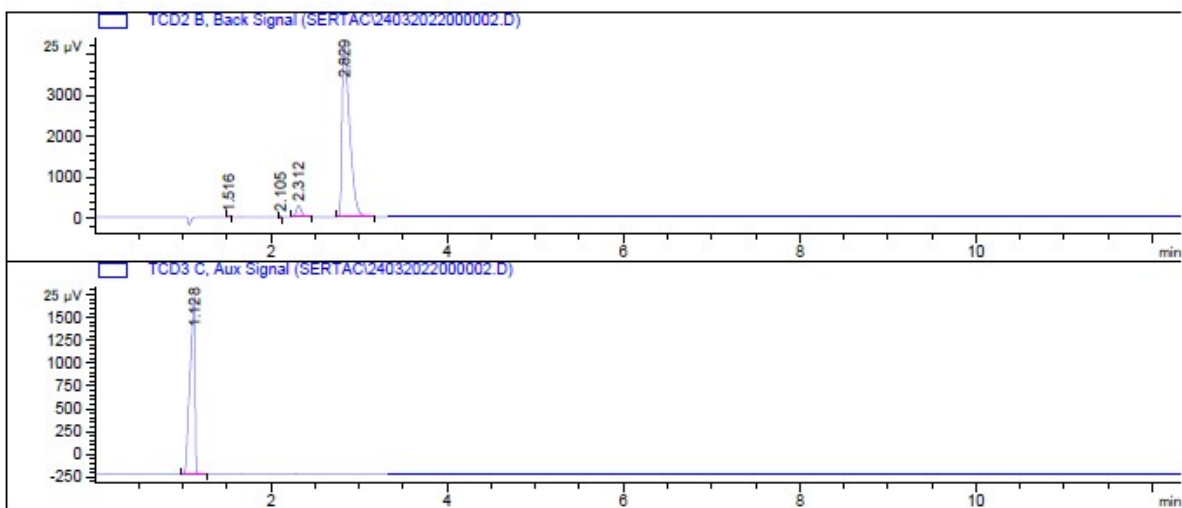

Signal 2: TCD2 B, Back Signal

| RetTime<br>[min] | Type | Area<br>[25 $\mu\text{V}\cdot\text{s}$ ] | Amt/Area   | Amount<br>[% mole] | Grp | Name |
|------------------|------|------------------------------------------|------------|--------------------|-----|------|
| 1.804            | -    | -                                        | -          | -                  | -   | CO2  |
| 2.829            | BB   | 2.51413e4                                | 2.32397e-3 | 58.42767           | -   | N2   |
| 4.335            | -    | -                                        | -          | -                  | -   | CO   |
| Totals :         |      |                                          |            | 58.42767           |     |      |

Signal 3: TCD3 C, Aux Signal

| RetTime<br>[min] | Type | Area<br>[25 $\mu\text{V}\cdot\text{s}$ ] | Amt/Area   | Amount<br>[% mole] | Grp | Name |
|------------------|------|------------------------------------------|------------|--------------------|-----|------|
| 1.128            | BB   | 7721.81692                               | 5.57870e-3 | 43.07771           | -   | H2   |
| Totals :         |      |                                          |            | 43.07771           |     |      |

**Figure S1.** GC traces to confirm  $\text{H}_2$  evolution

## Traces of $^1\text{H}$ and $^{13}\text{C}$ NMR spectra of isolated products

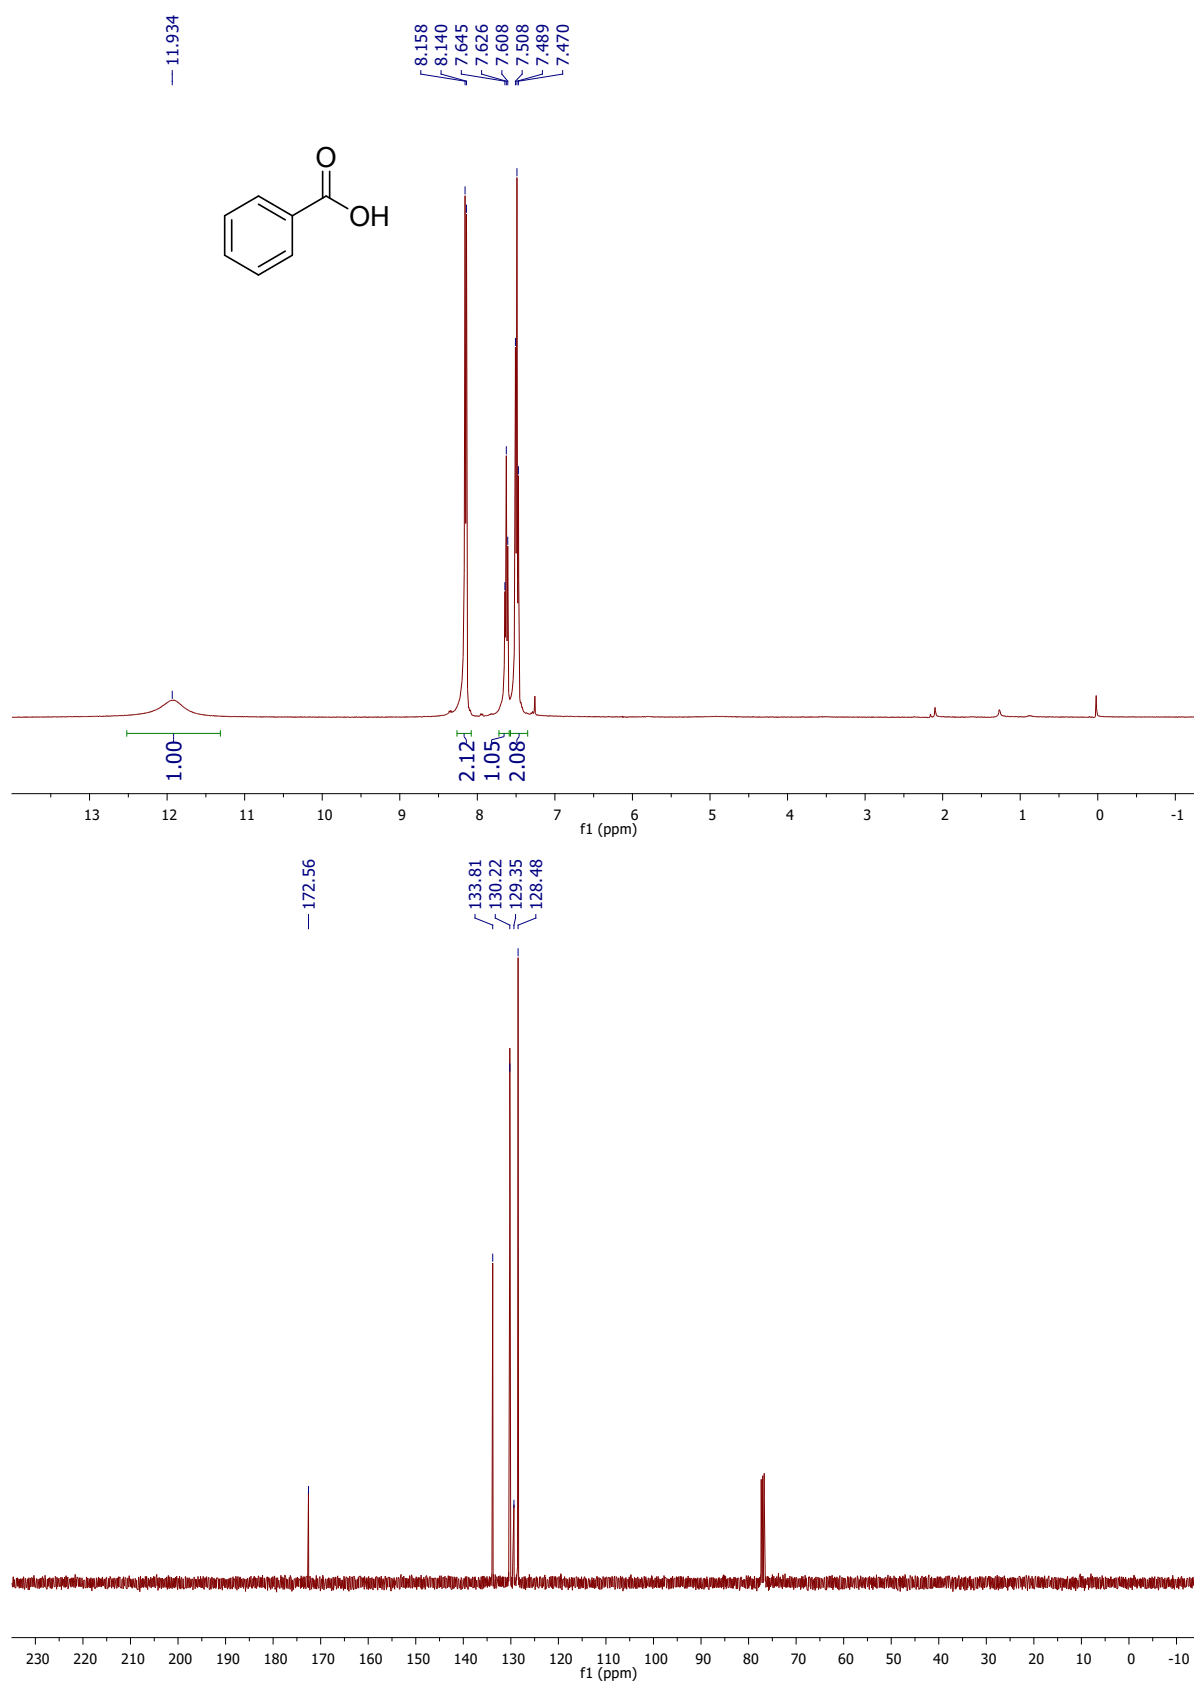

**Figure S2.**  $^1\text{H}$  (400 MHz,  $\text{CDCl}_3$ ) and  $^{13}\text{C}\{^1\text{H}\}$  (100.6 MHz,  $\text{CDCl}_3$ ) NMR spectra of **3a**

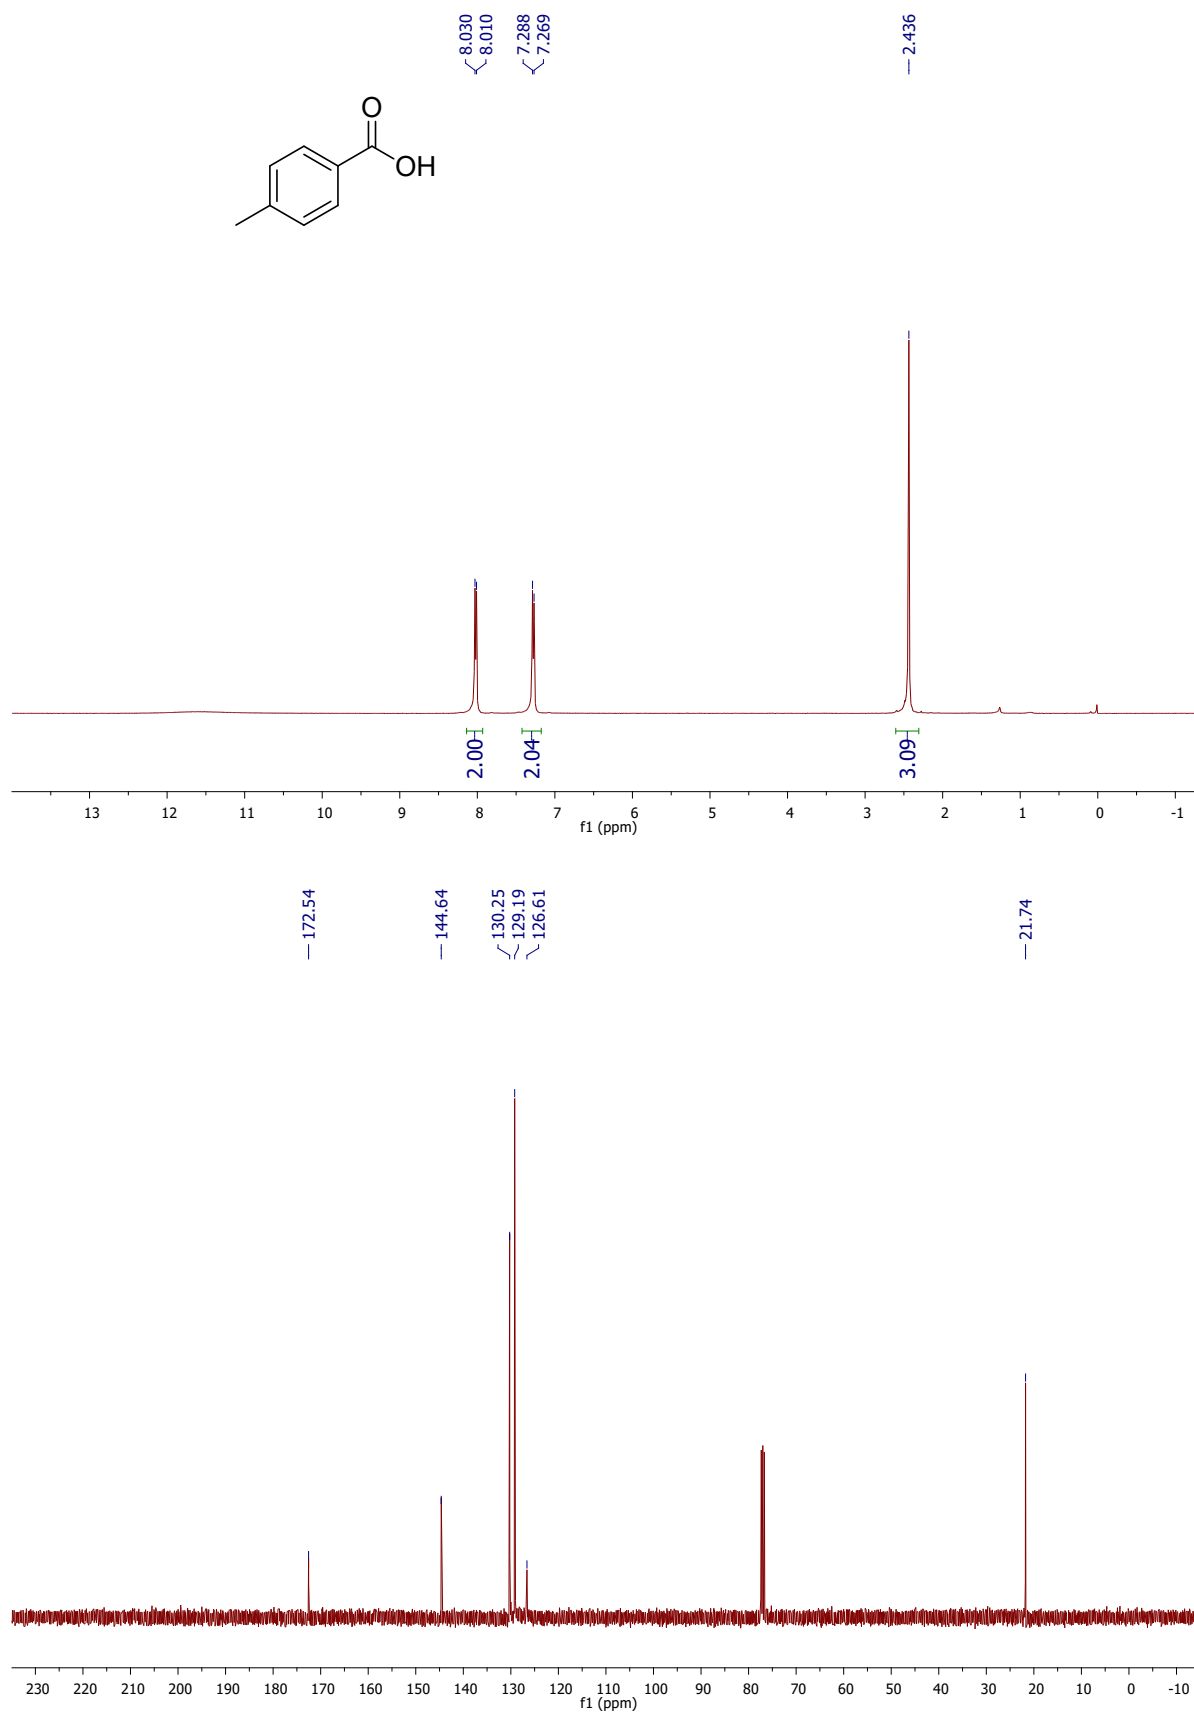

**Figure S3.** <sup>1</sup>H (400 MHz, CDCl<sub>3</sub>) and <sup>13</sup>C{<sup>1</sup>H} (100.6 MHz, CDCl<sub>3</sub>) NMR spectra of **3b**

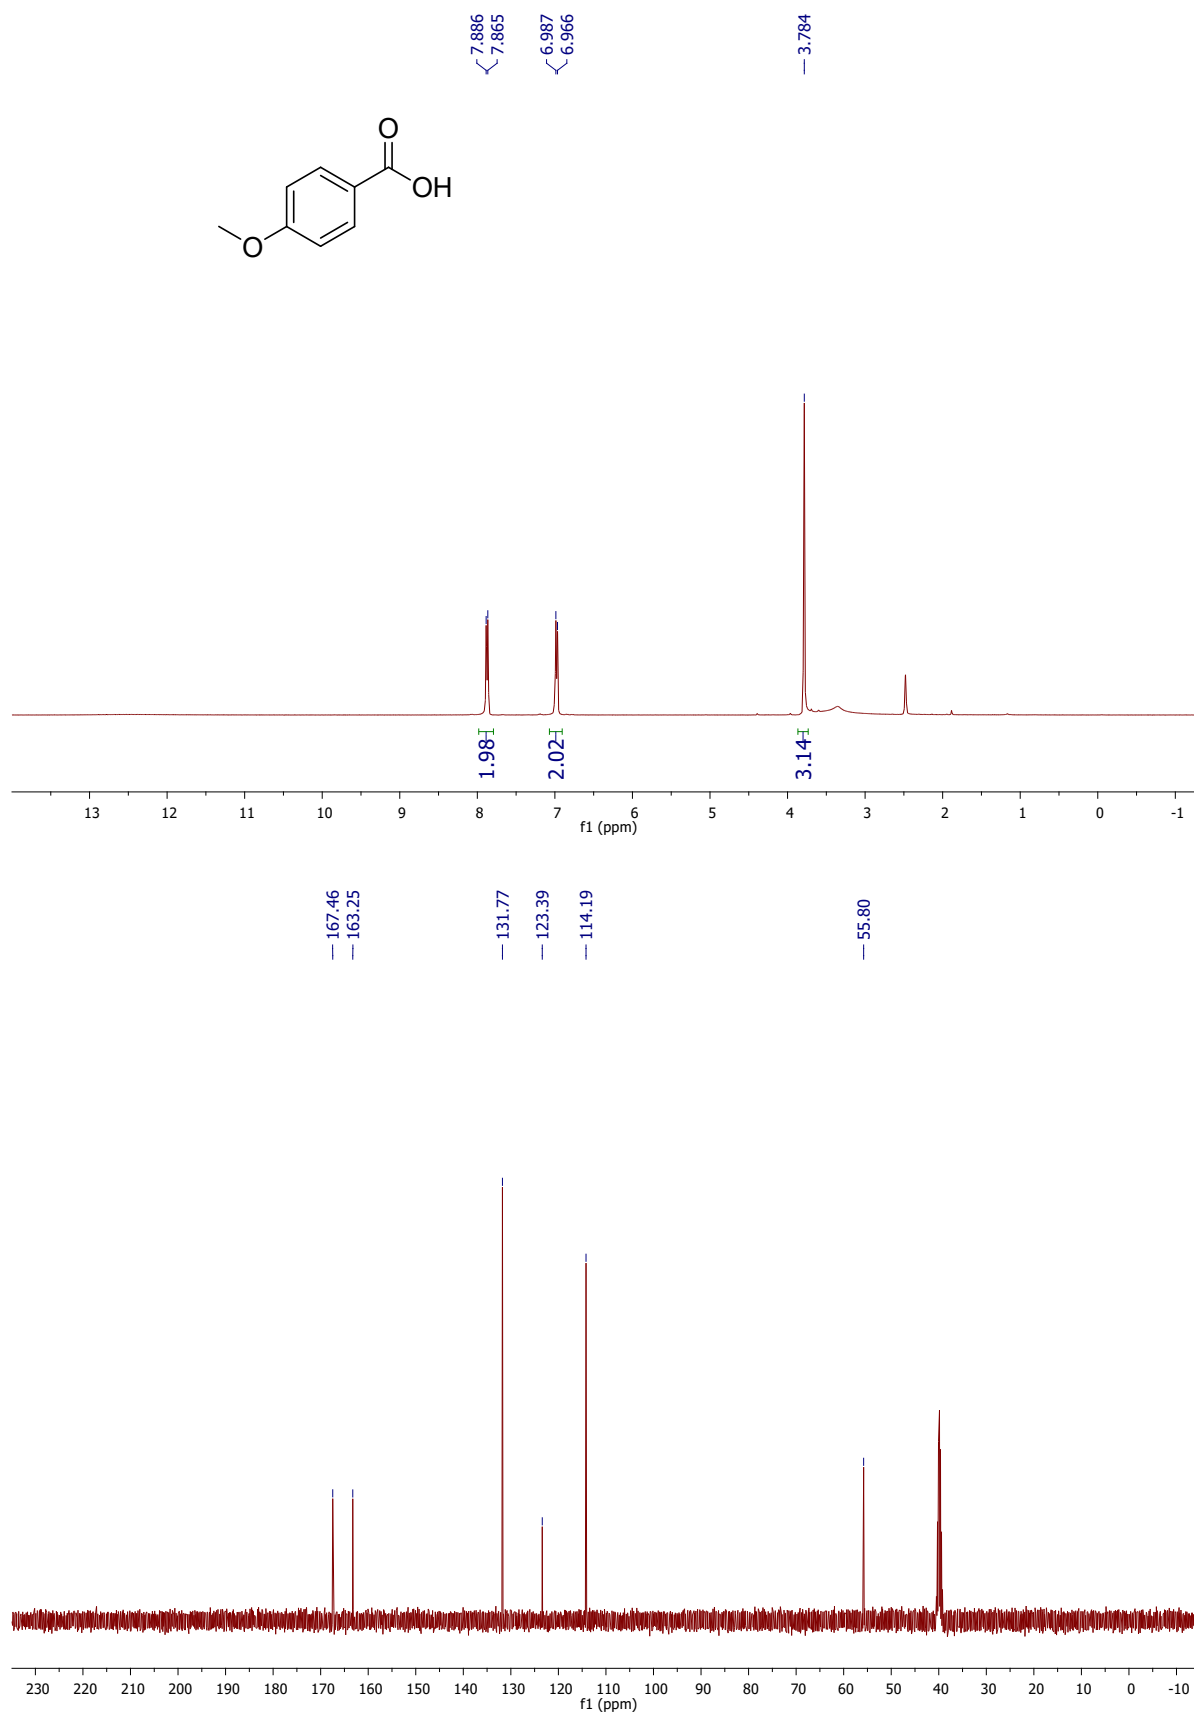

**Figure S4.**  $^1\text{H}$  (400 MHz,  $\text{DMSO-}d_6$ ) and  $^{13}\text{C}\{^1\text{H}\}$  (100.6 MHz,  $\text{DMSO-}d_6$ ) NMR spectra of **3c**

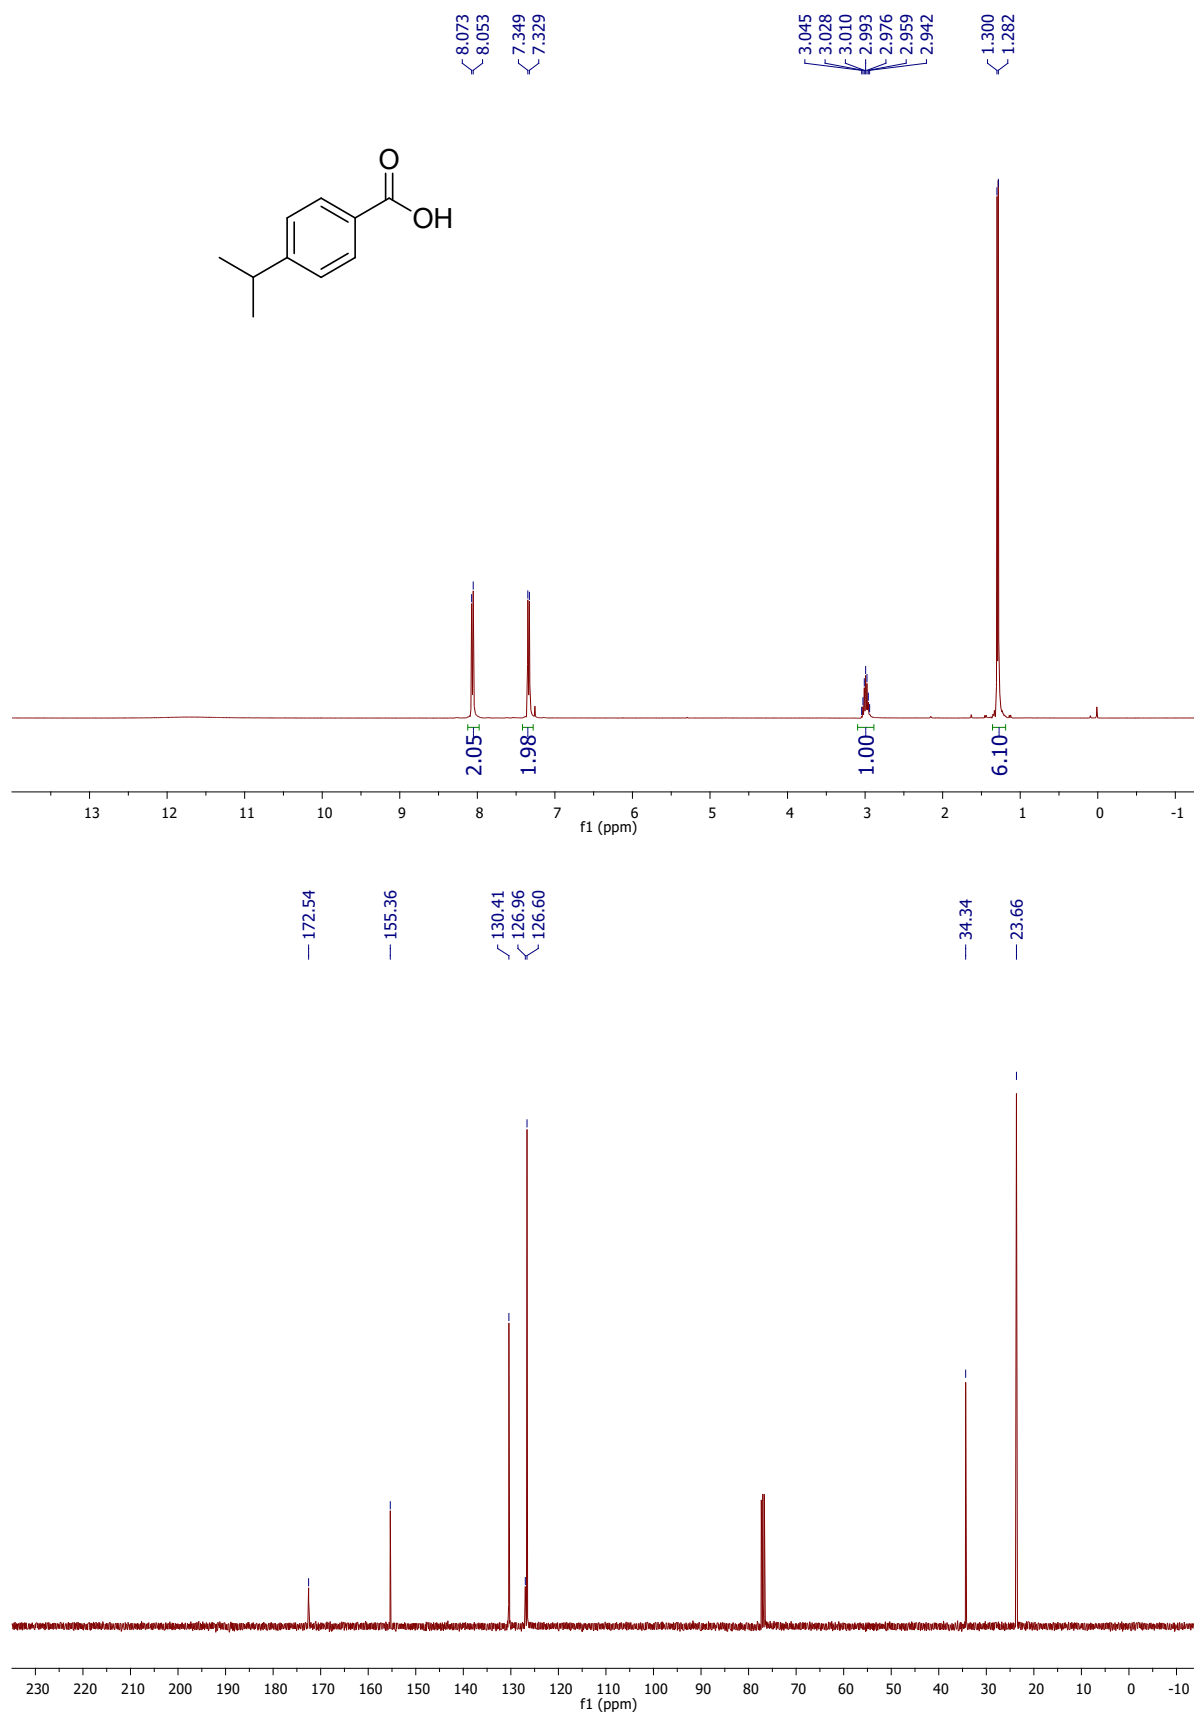

**Figure S5.** <sup>1</sup>H (400 MHz, CDCl<sub>3</sub>) and <sup>13</sup>C{<sup>1</sup>H} (100.6 MHz, CDCl<sub>3</sub>) NMR spectra of **3d**

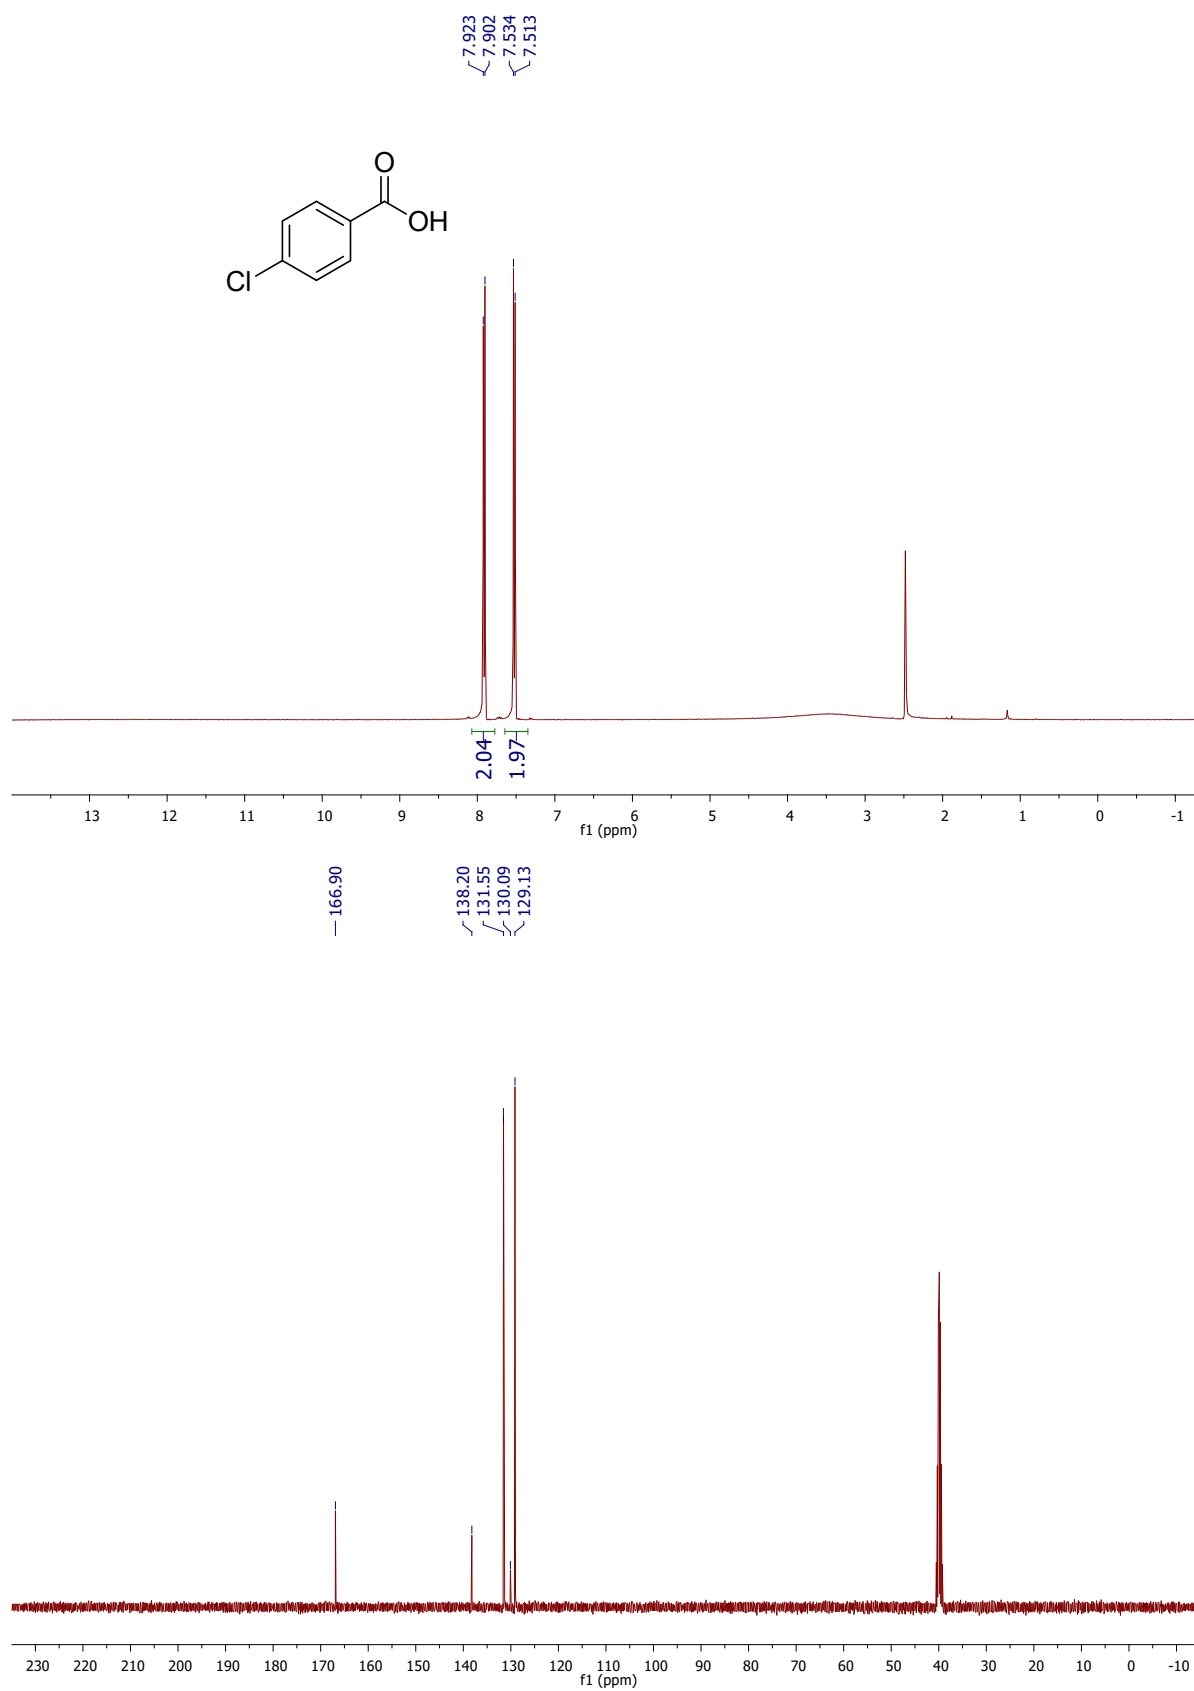

**Figure S6.**  $^1\text{H}$  (400 MHz,  $\text{DMSO}-d_6$ ) and  $^{13}\text{C}\{^1\text{H}\}$  (100.6 MHz,  $\text{DMSO}-d_6$ ) NMR spectra of **3e**

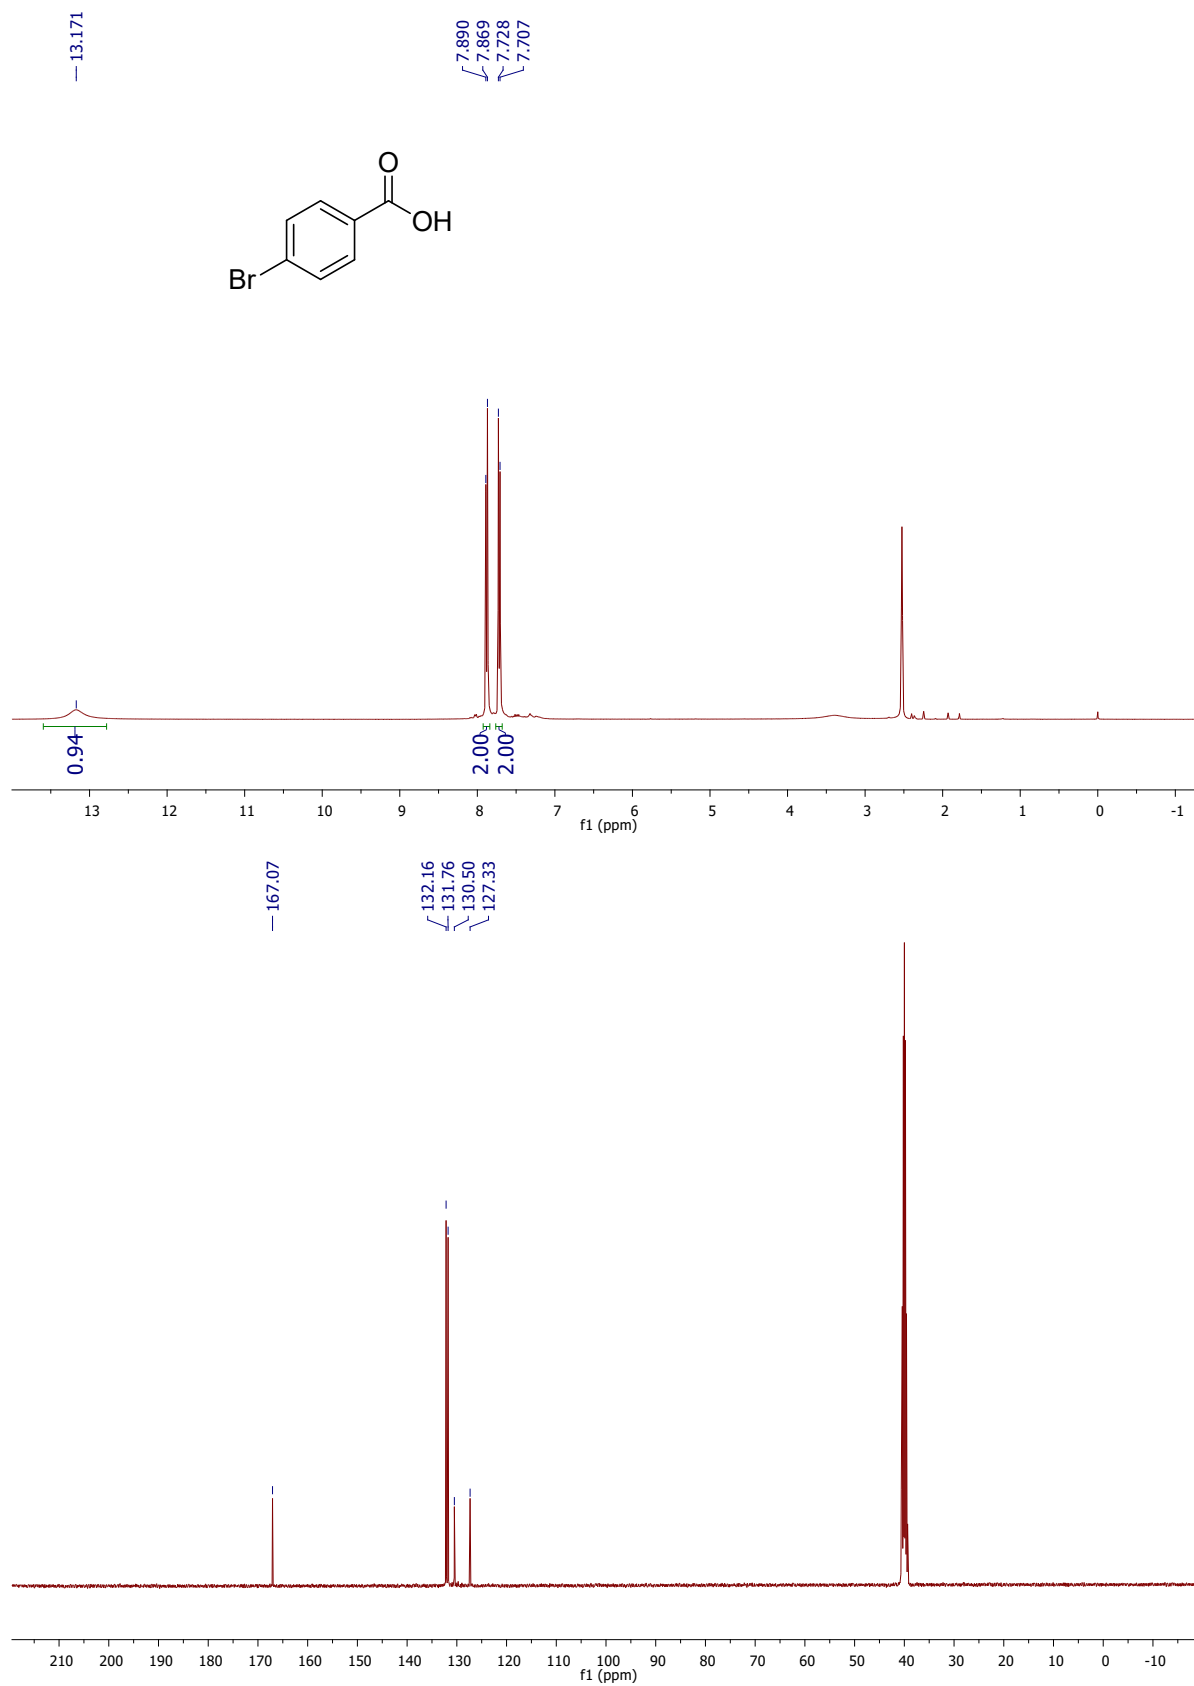

**Figure S7.**  $^1\text{H}$  (400 MHz, DMSO- $d_6$ ) and  $^{13}\text{C}\{^1\text{H}\}$  (100.6 MHz, DMSO- $d_6$ ) NMR spectra of **3f**



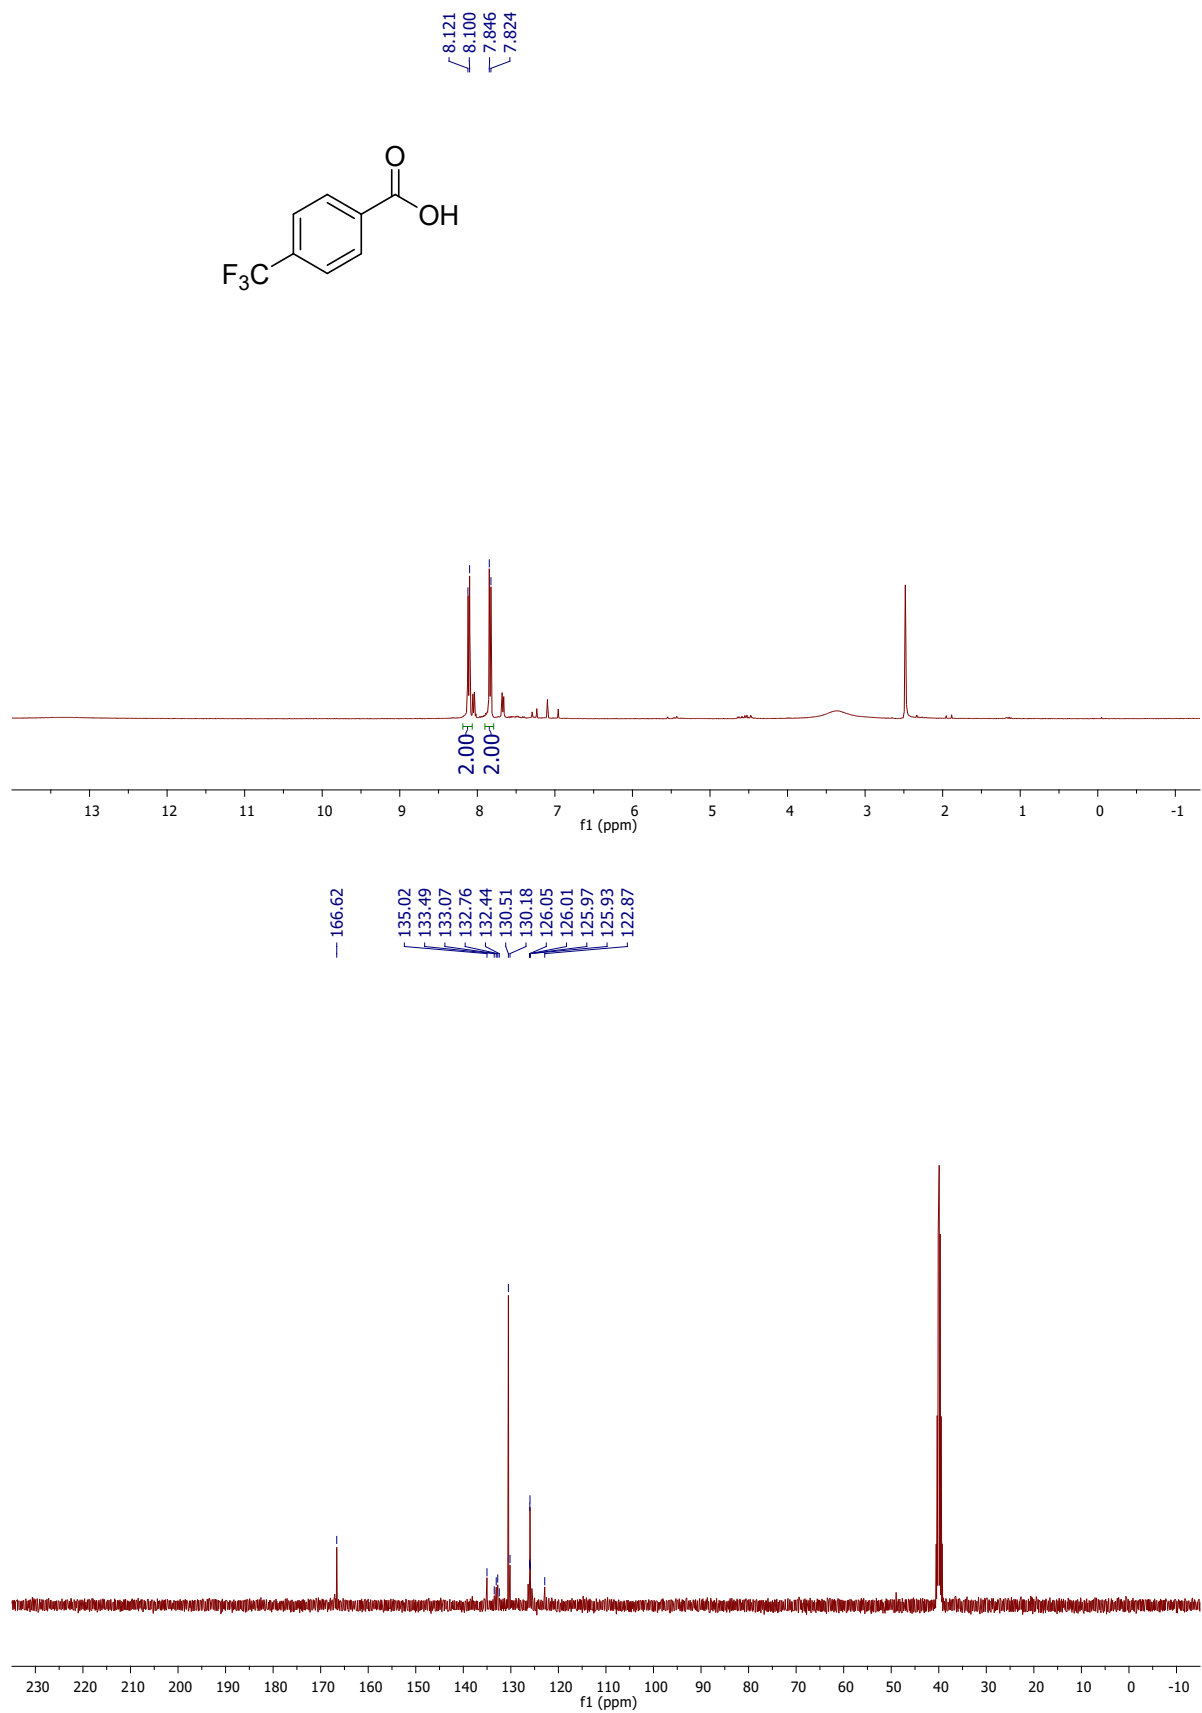

**Figure S8.**  $^1\text{H}$  (400 MHz,  $\text{DMSO-}d_6$ ) and  $^{13}\text{C}\{^1\text{H}\}$  (100.6 MHz,  $\text{DMSO-}d_6$ ) NMR spectra of **3g**

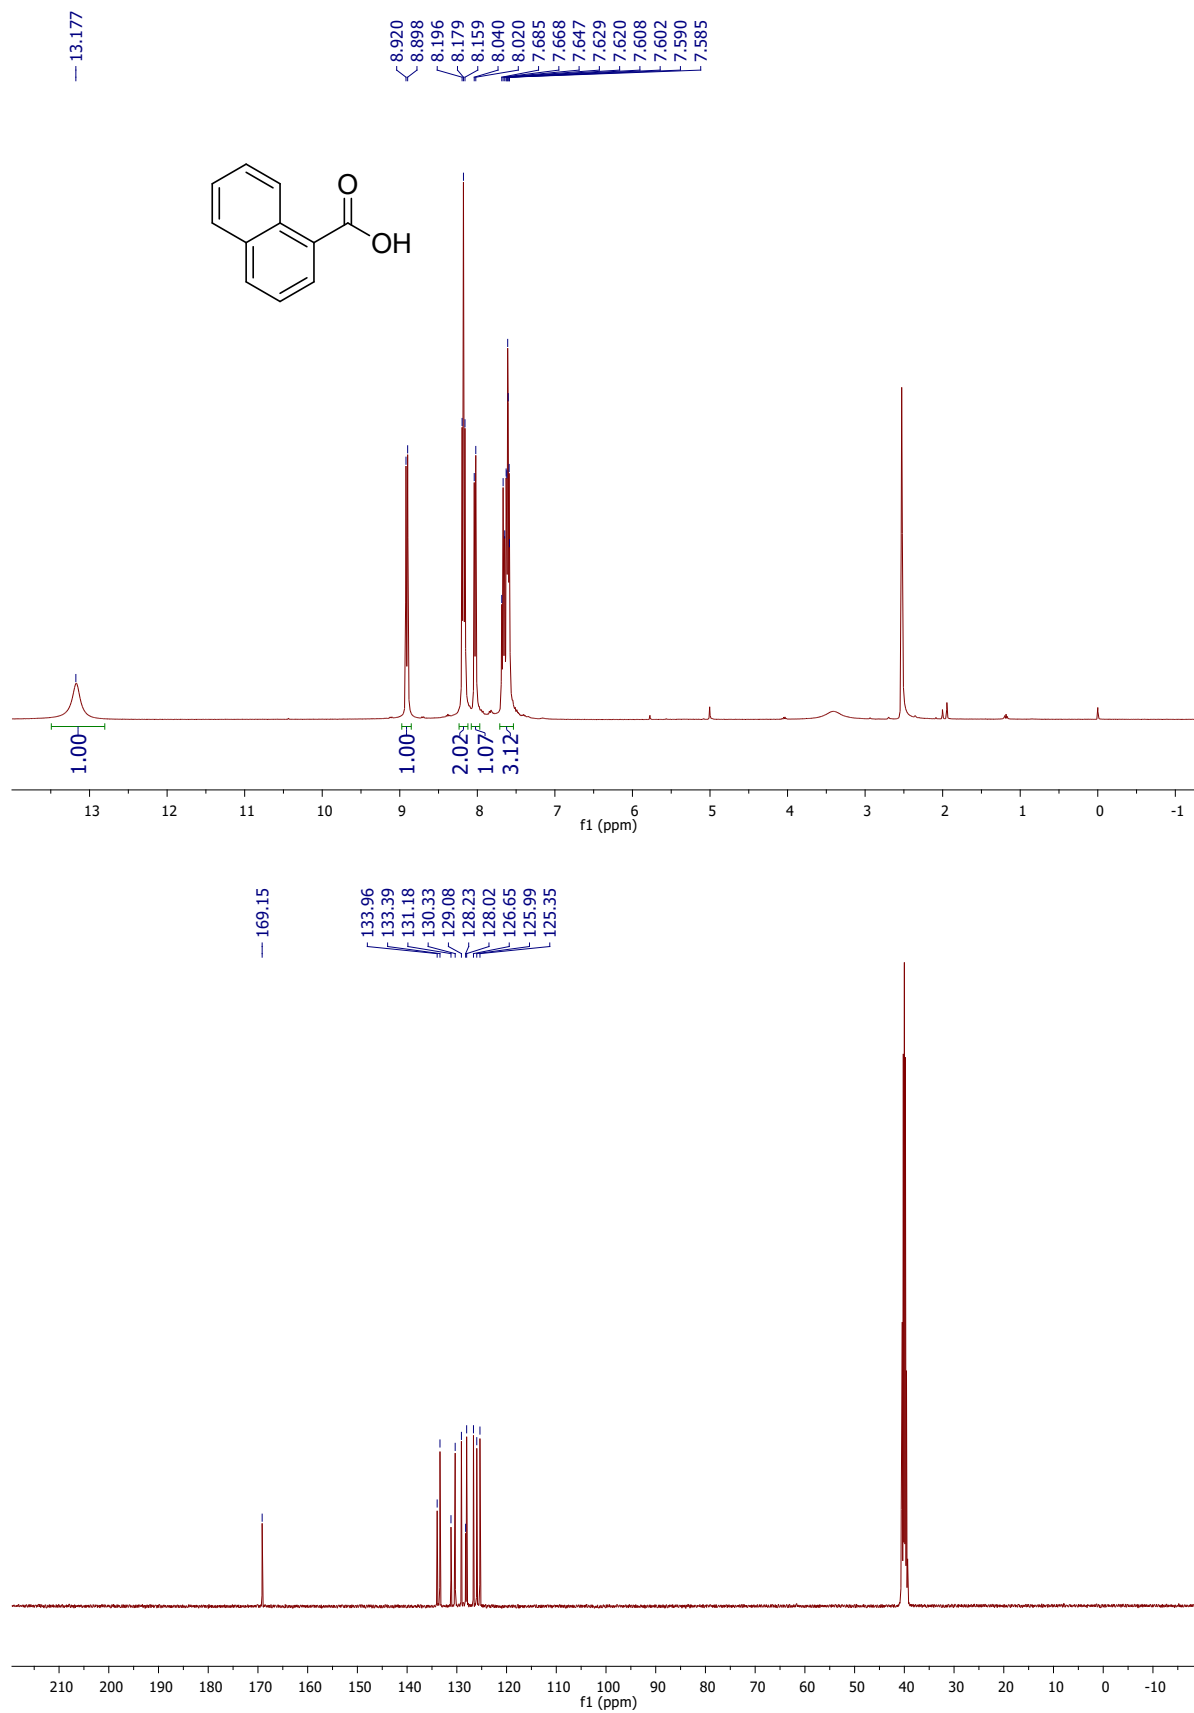

**Figure S9.**  $^1\text{H}$  (400 MHz,  $\text{DMSO-}d_6$ ) and  $^{13}\text{C}\{^1\text{H}\}$  (100.6 MHz,  $\text{DMSO-}d_6$ ) NMR spectra of **3h**

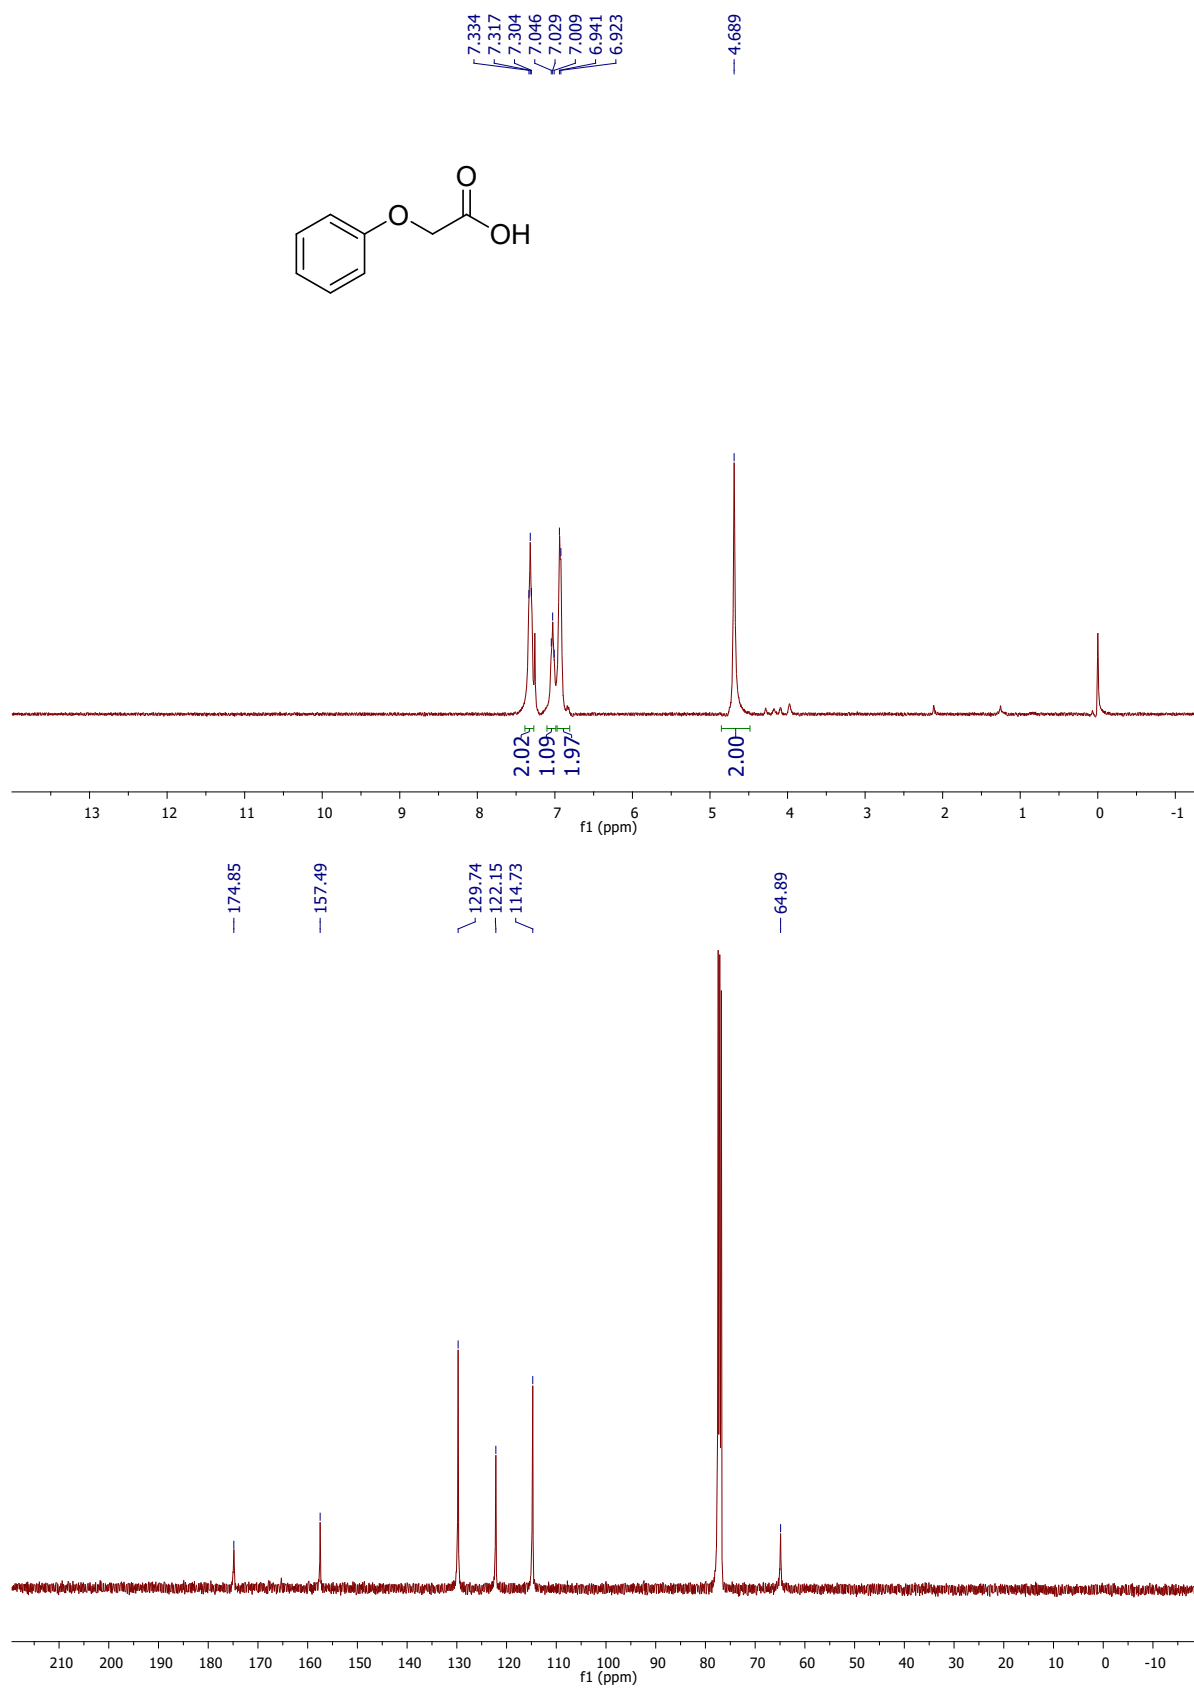

**Figure S10.**  $^1\text{H}$  (400 MHz,  $\text{CDCl}_3$ ) and  $^{13}\text{C}\{^1\text{H}\}$  (100.6 MHz,  $\text{CDCl}_3$ ) NMR spectra of **3i**

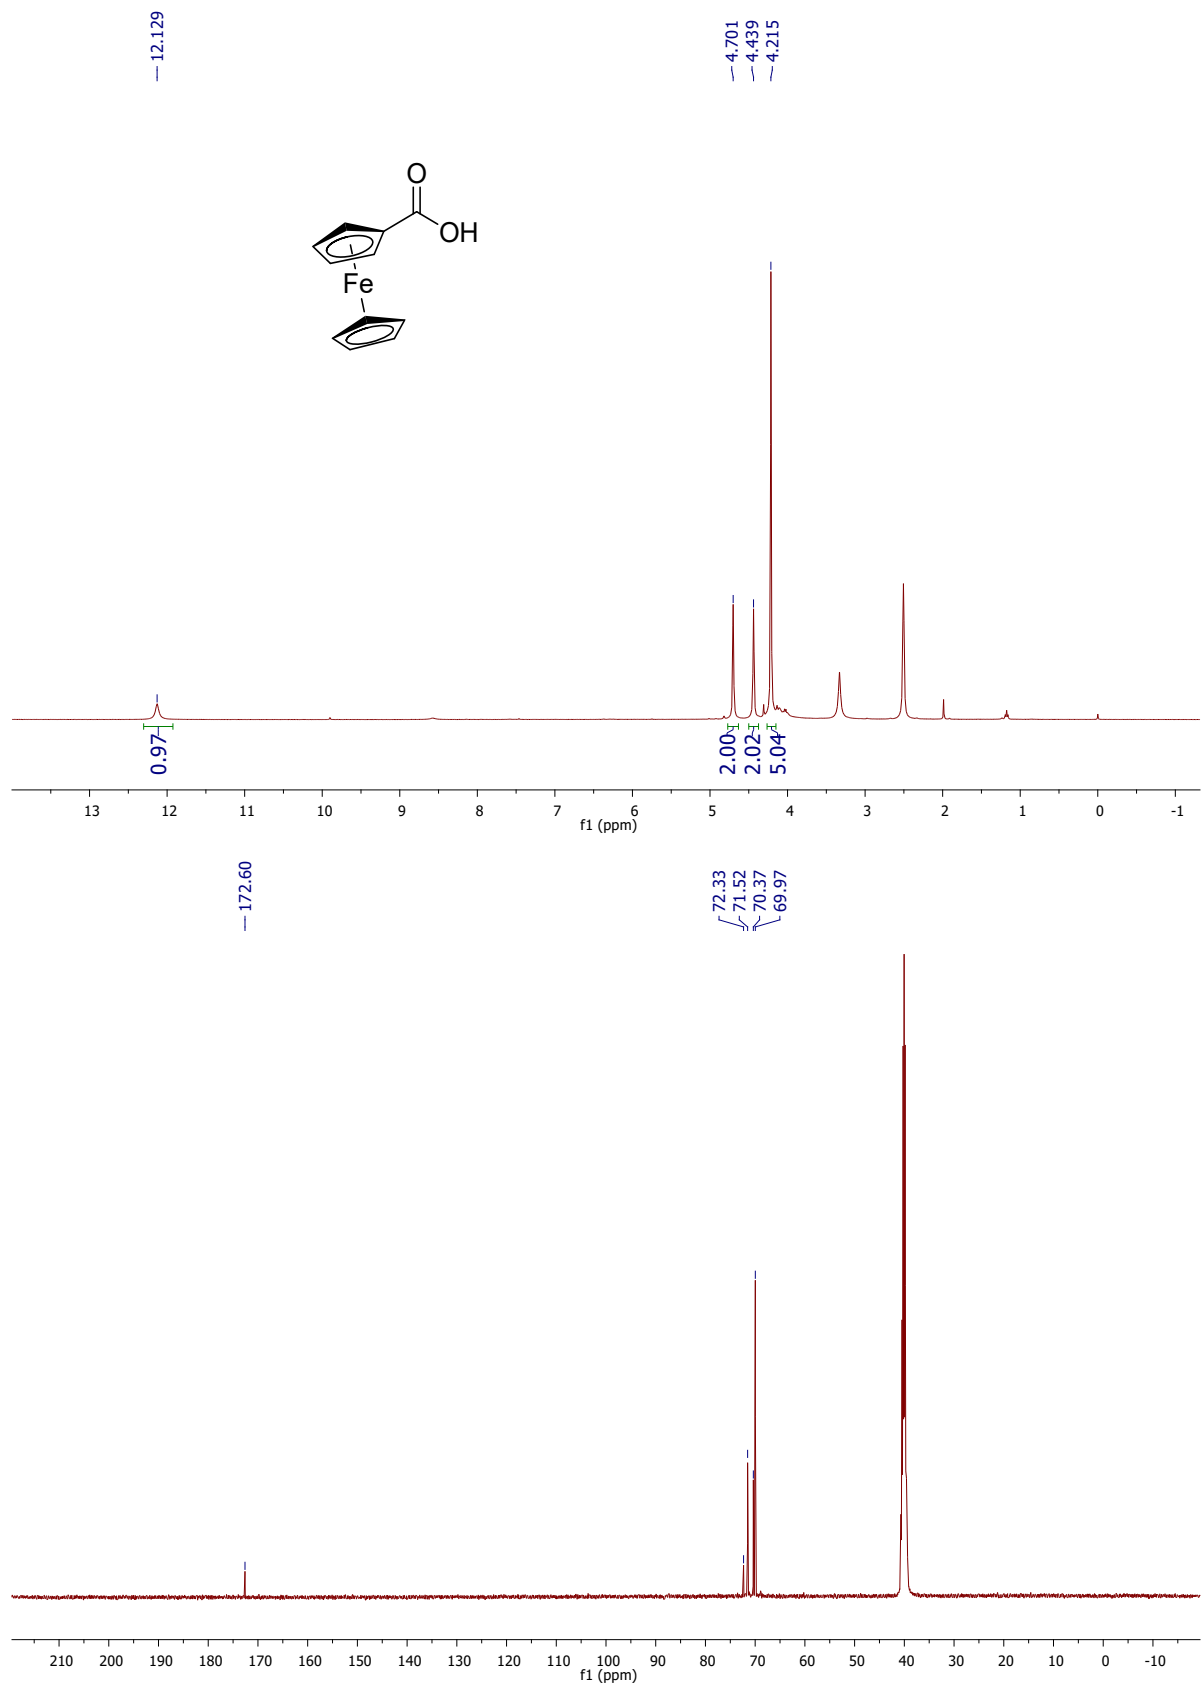

**Figure S11.**  $^1\text{H}$  (400 MHz,  $\text{DMSO-}d_6$ ) and  $^{13}\text{C}\{^1\text{H}\}$  (100.6 MHz,  $\text{DMSO-}d_6$ ) NMR spectra of **3j**

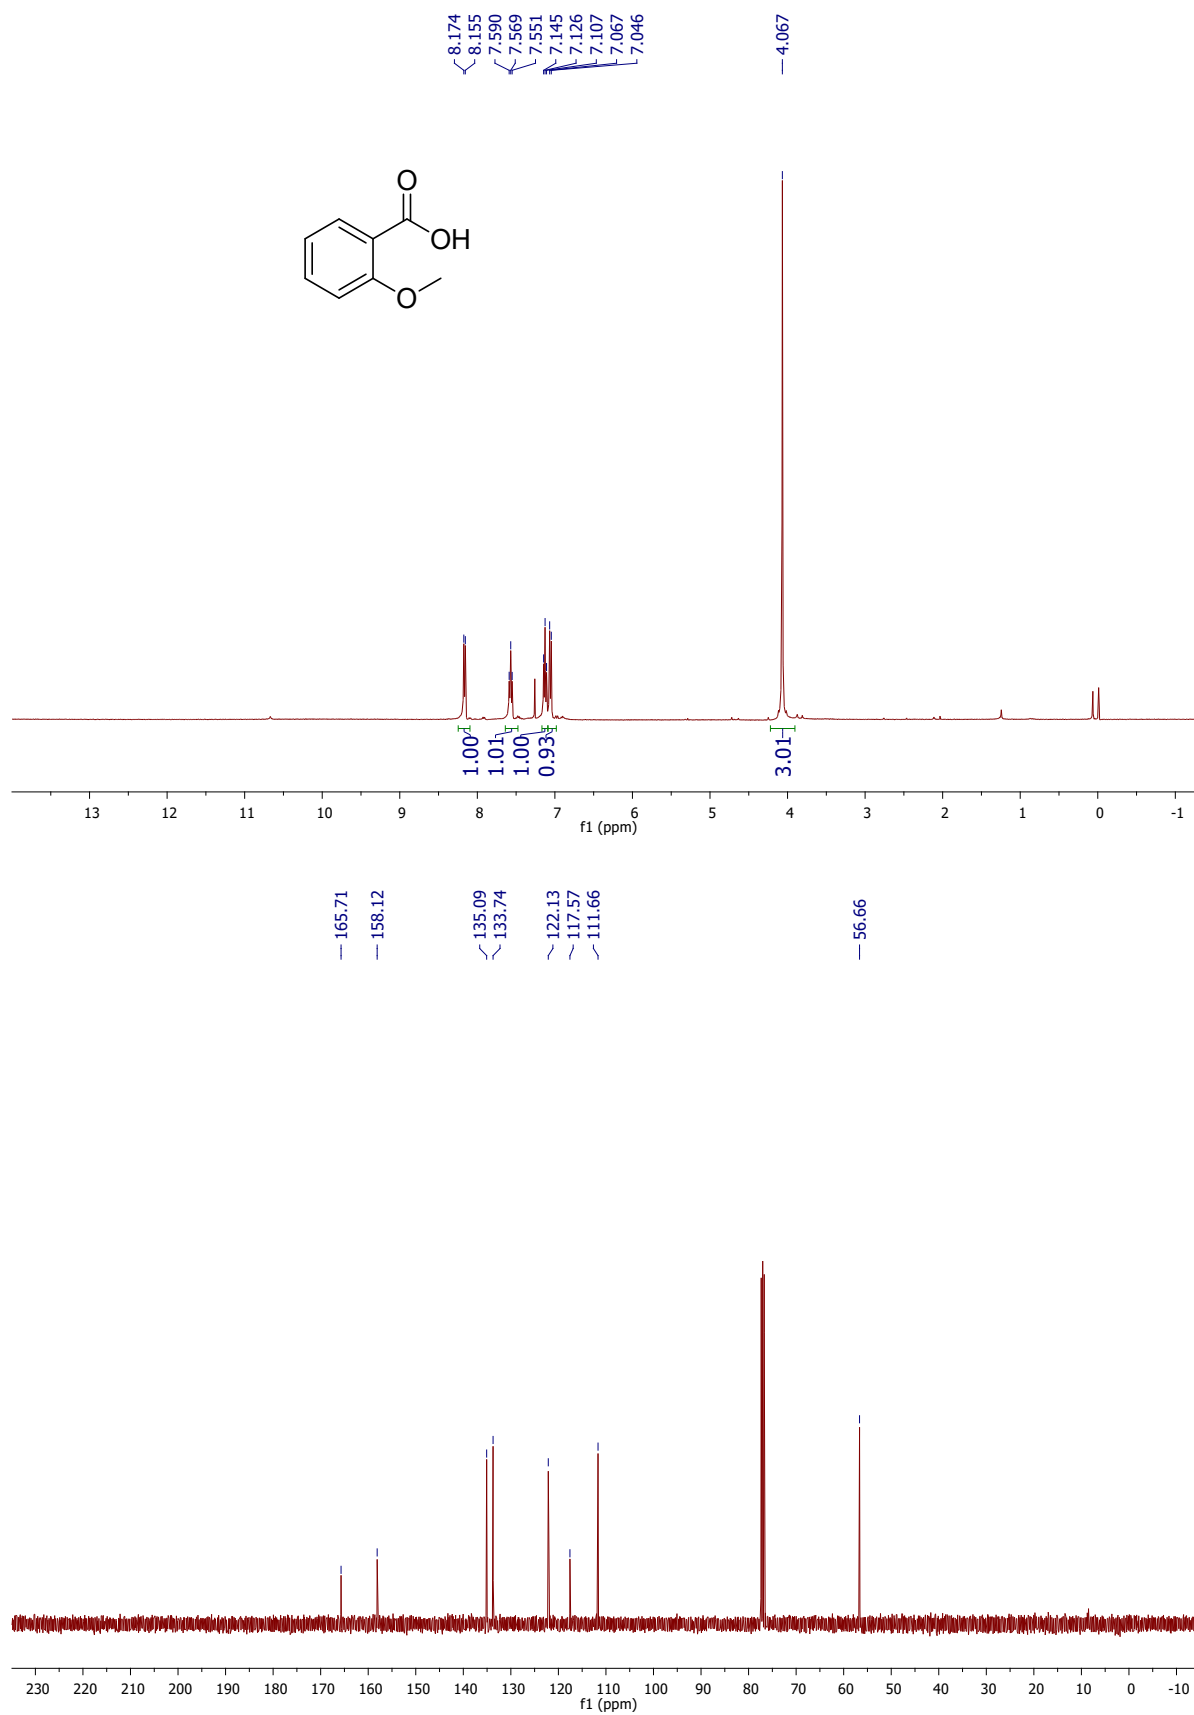

**Figure S12.** <sup>1</sup>H (400 MHz, CDCl<sub>3</sub>) and <sup>13</sup>C{<sup>1</sup>H} (100.6 MHz, CDCl<sub>3</sub>) NMR spectra of **3k**

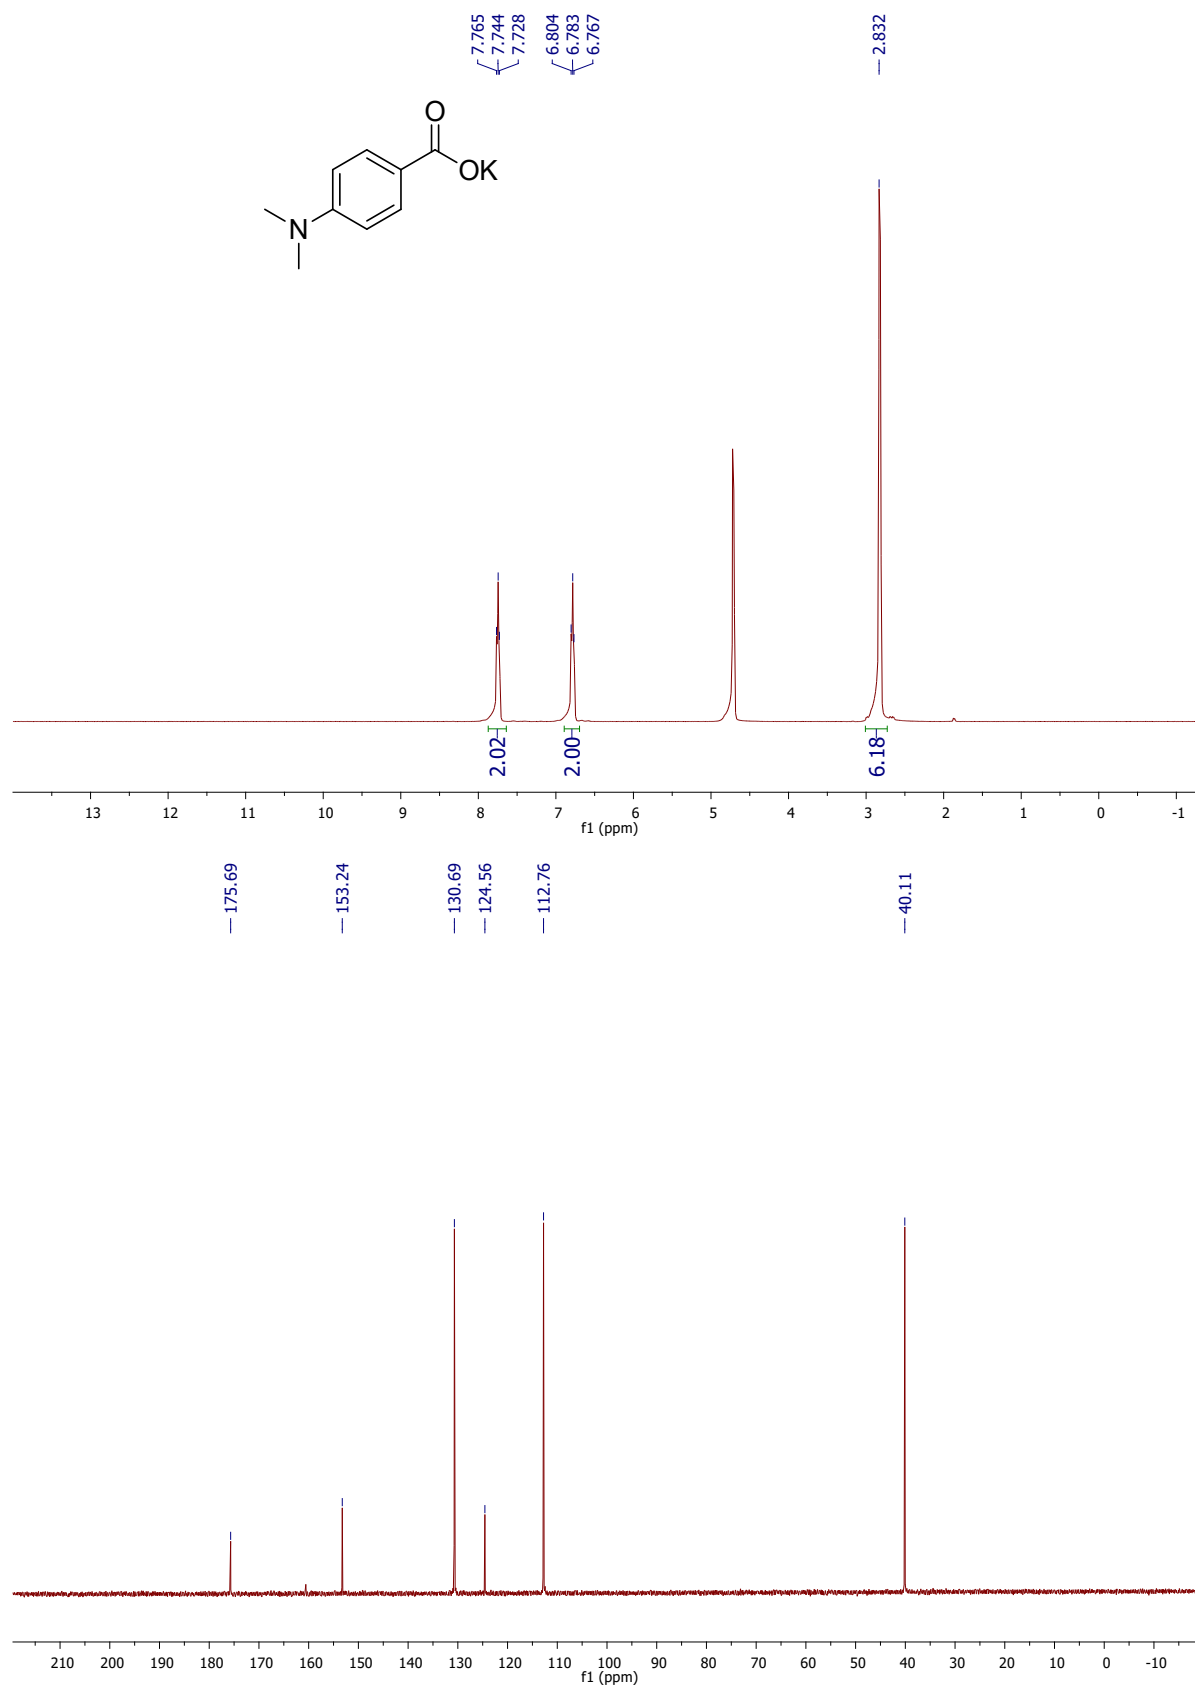

**Figure S13.**  $^1\text{H}$  (400 MHz,  $\text{D}_2\text{O}$ ) and  $^{13}\text{C}\{^1\text{H}\}$  (100.6 MHz,  $\text{D}_2\text{O}$ ) NMR spectra of **31**

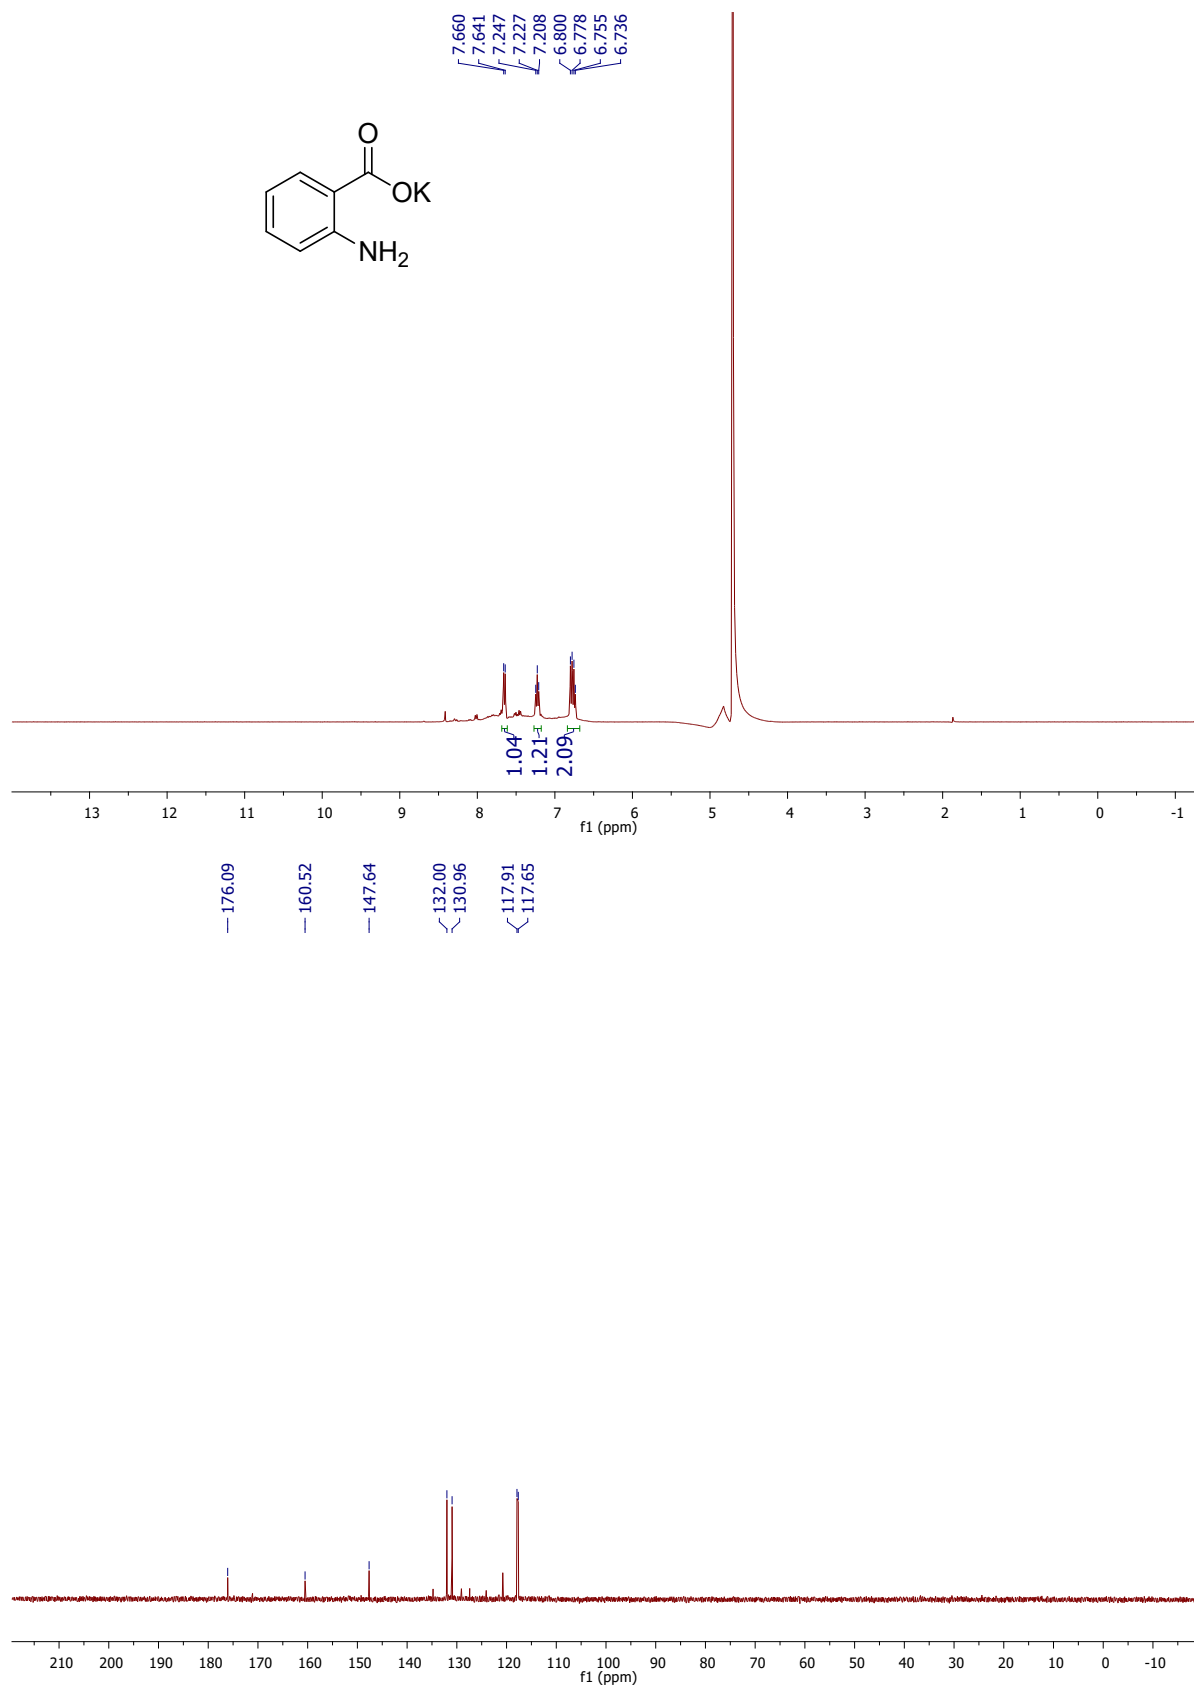

**Figure S14.** <sup>1</sup>H (400 MHz, D<sub>2</sub>O) and <sup>13</sup>C{<sup>1</sup>H} (100.6 MHz, D<sub>2</sub>O) NMR spectra of **3m**

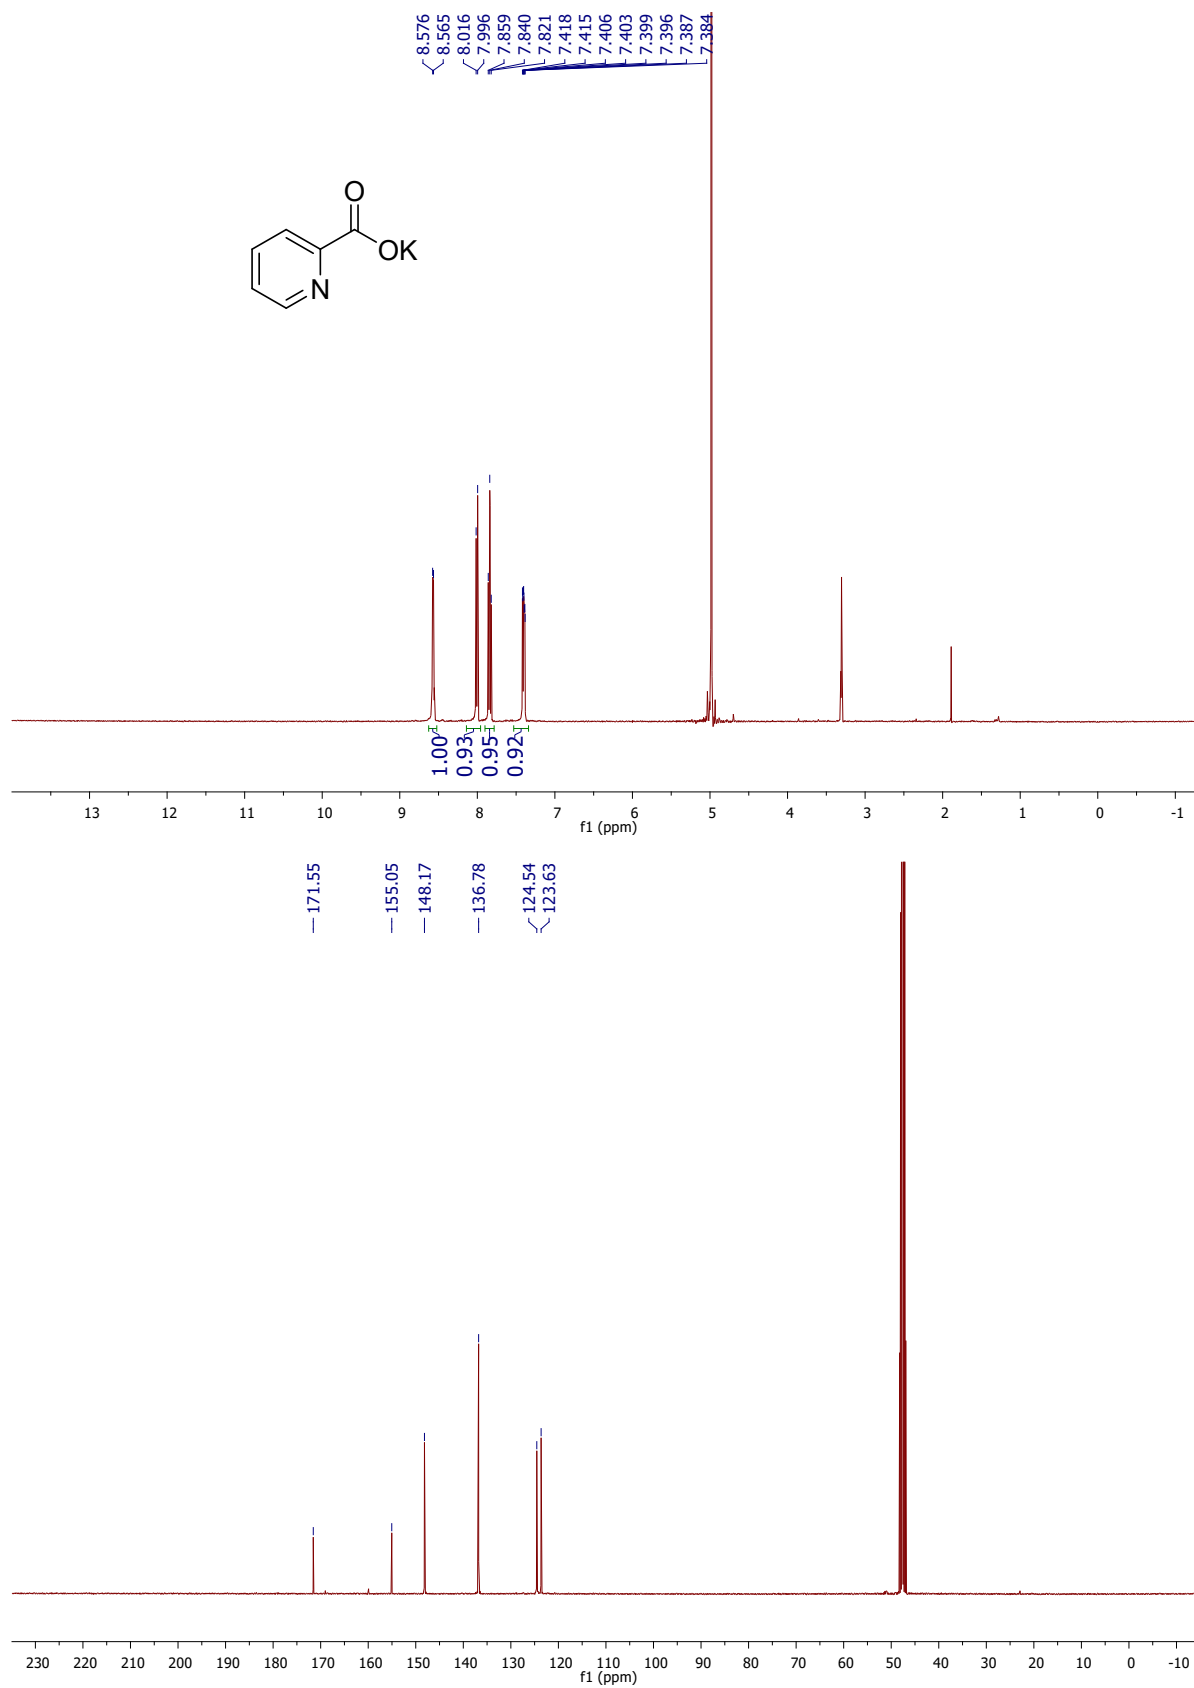

**Figure S15.**  $^1\text{H}$  (400 MHz,  $\text{CD}_3\text{OD}$ ) and  $^{13}\text{C}\{^1\text{H}\}$  (100.6 MHz,  $\text{CD}_3\text{OD}$ ) NMR spectra of **3n**



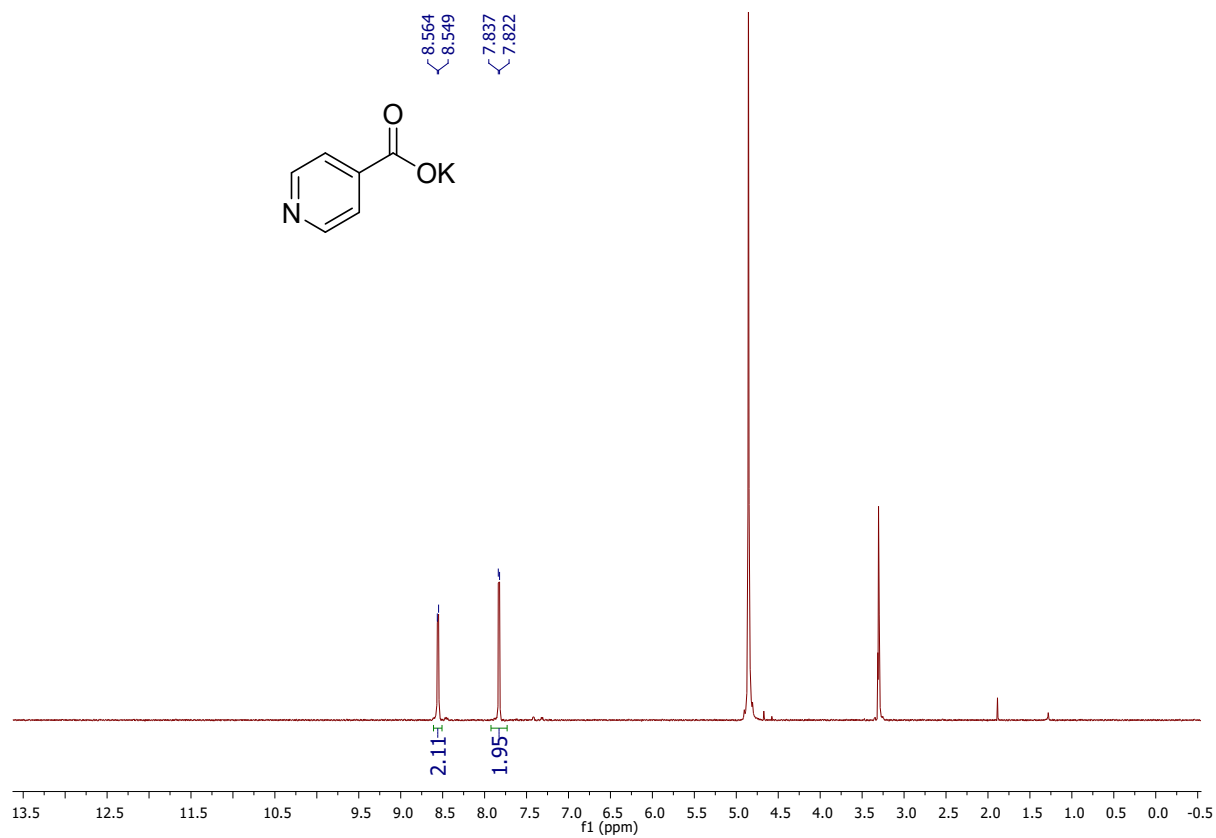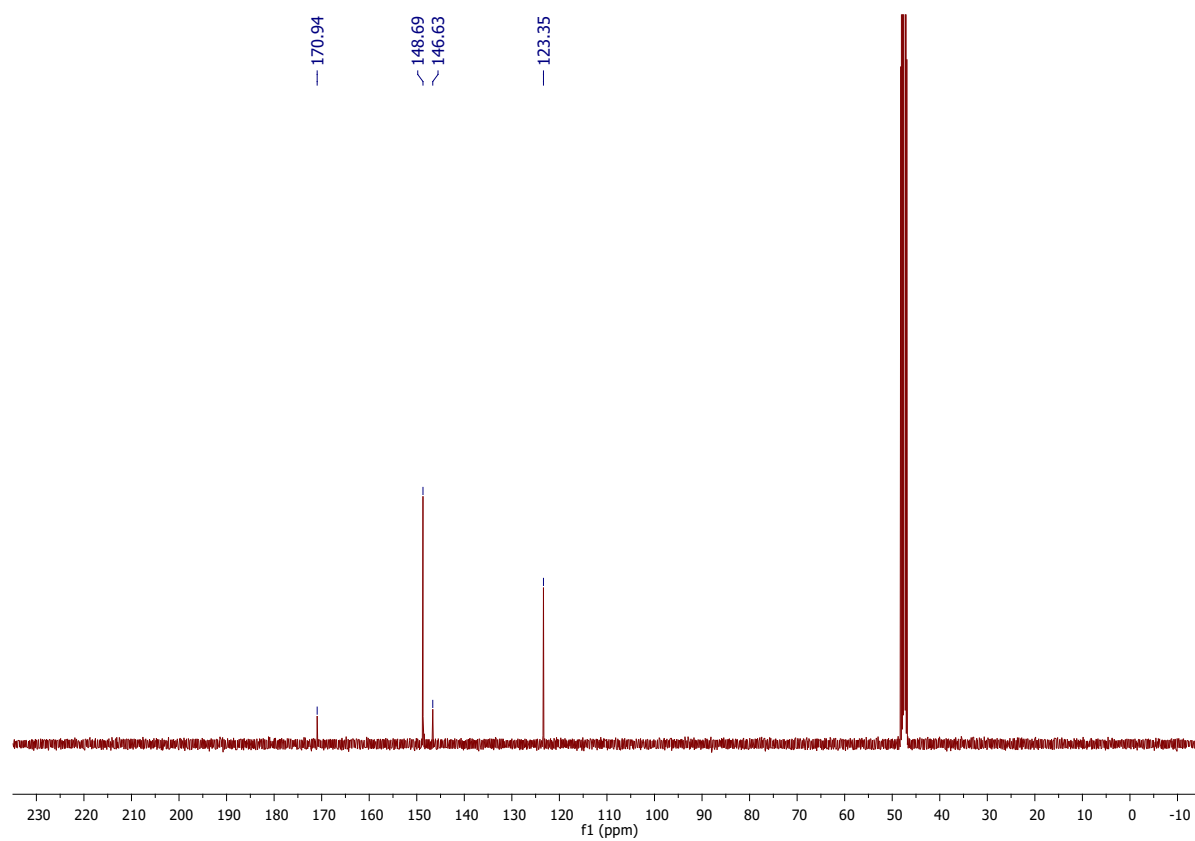

**Figure S16.**  $^1\text{H}$  (400 MHz,  $\text{CD}_3\text{OD}$ ) and  $^{13}\text{C}\{^1\text{H}\}$  (100.6 MHz,  $\text{CD}_3\text{OD}$ ) NMR spectra of **3o**

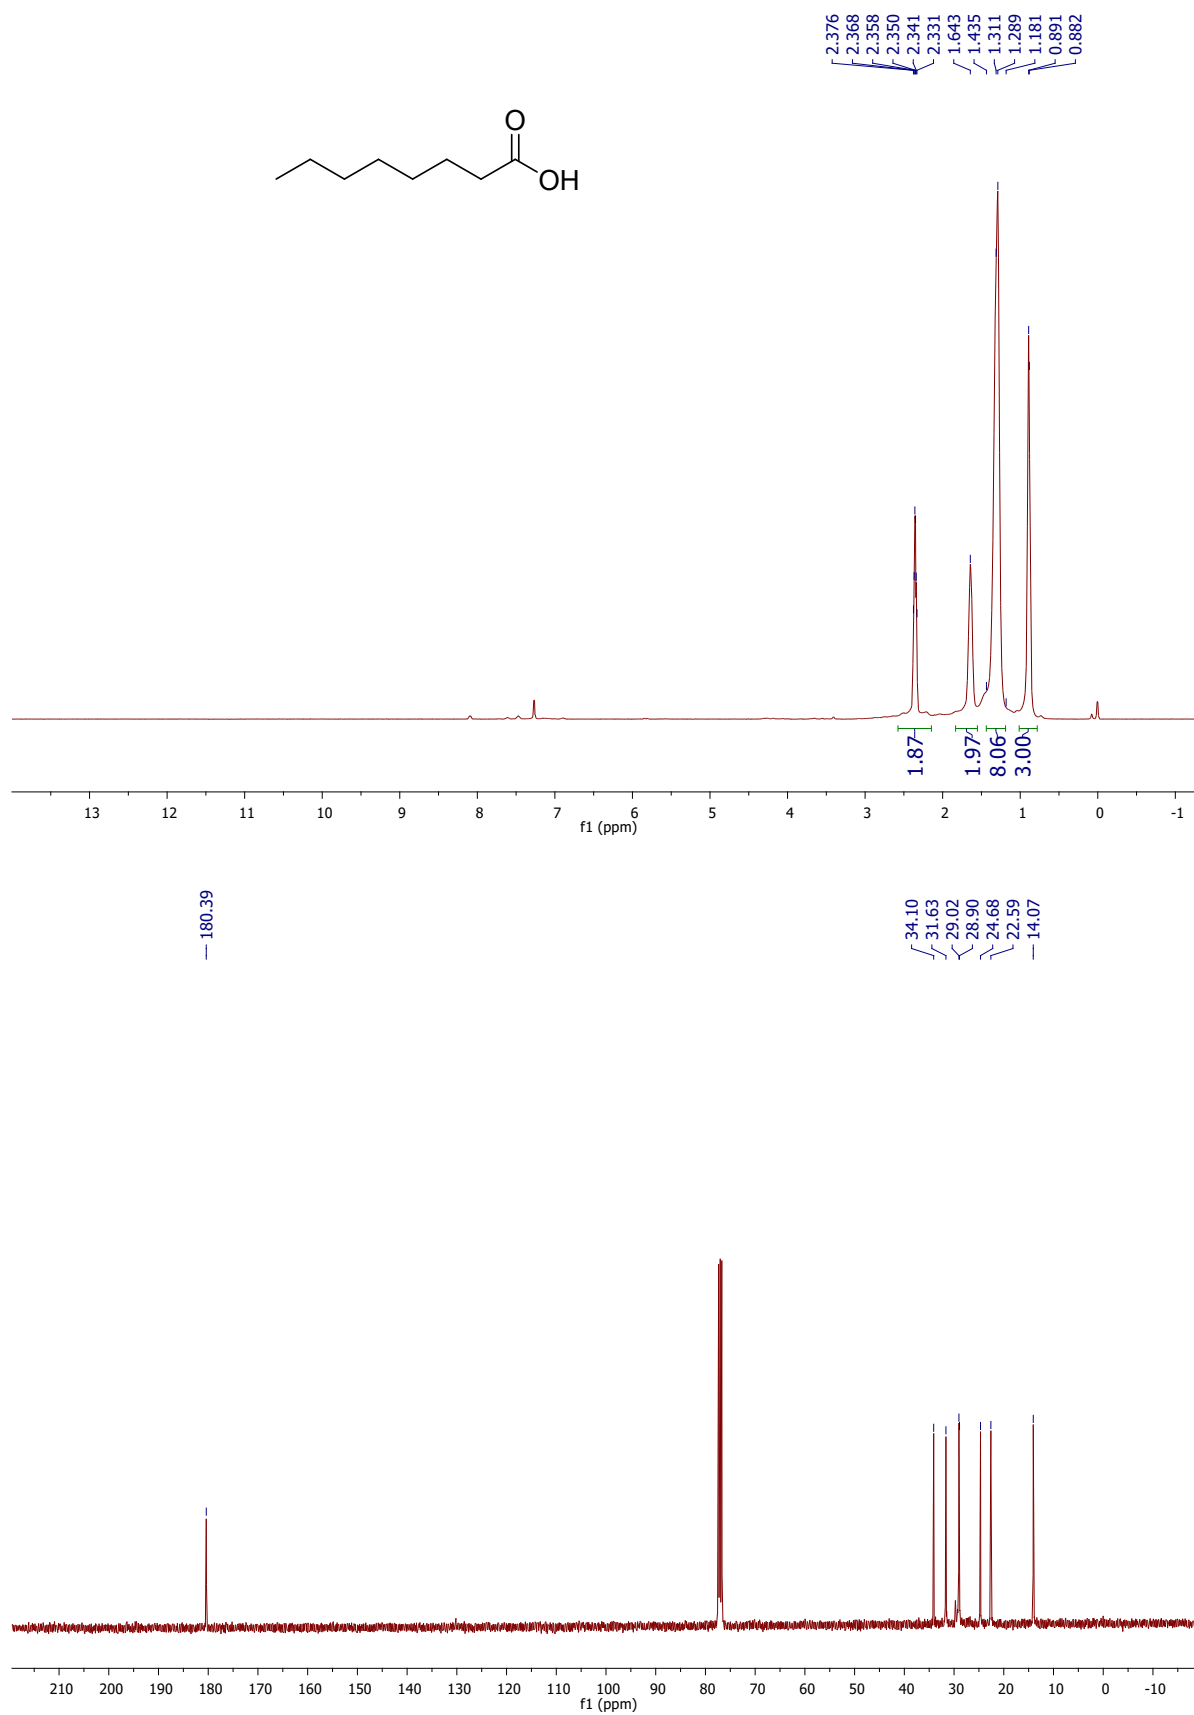

**Figure S17.**  $^1\text{H}$  (400 MHz,  $\text{CDCl}_3$ ) and  $^{13}\text{C}\{^1\text{H}\}$  (100.6 MHz,  $\text{CDCl}_3$ ) NMR spectra of **3p**

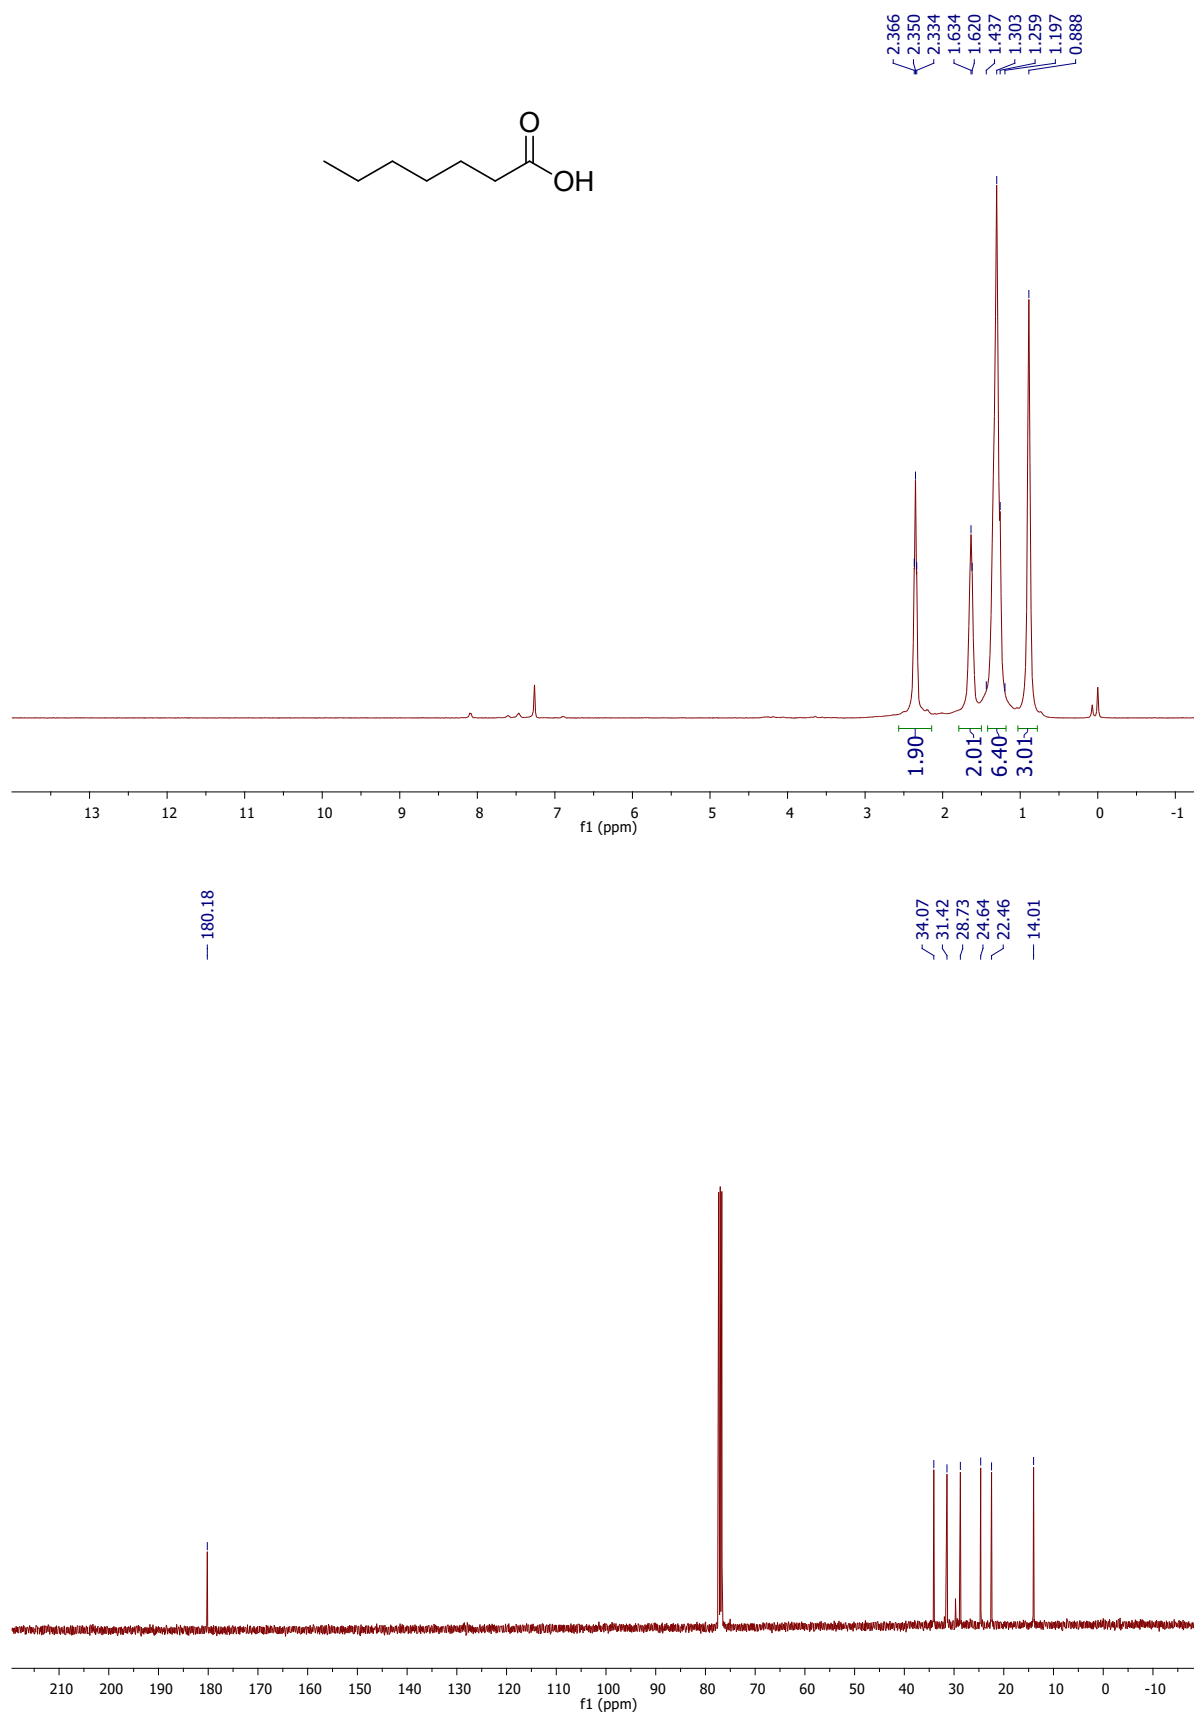

**Figure S18.** <sup>1</sup>H (400 MHz, CDCl<sub>3</sub>) and <sup>13</sup>C{<sup>1</sup>H} (100.6 MHz, CDCl<sub>3</sub>) NMR spectra of **3q**

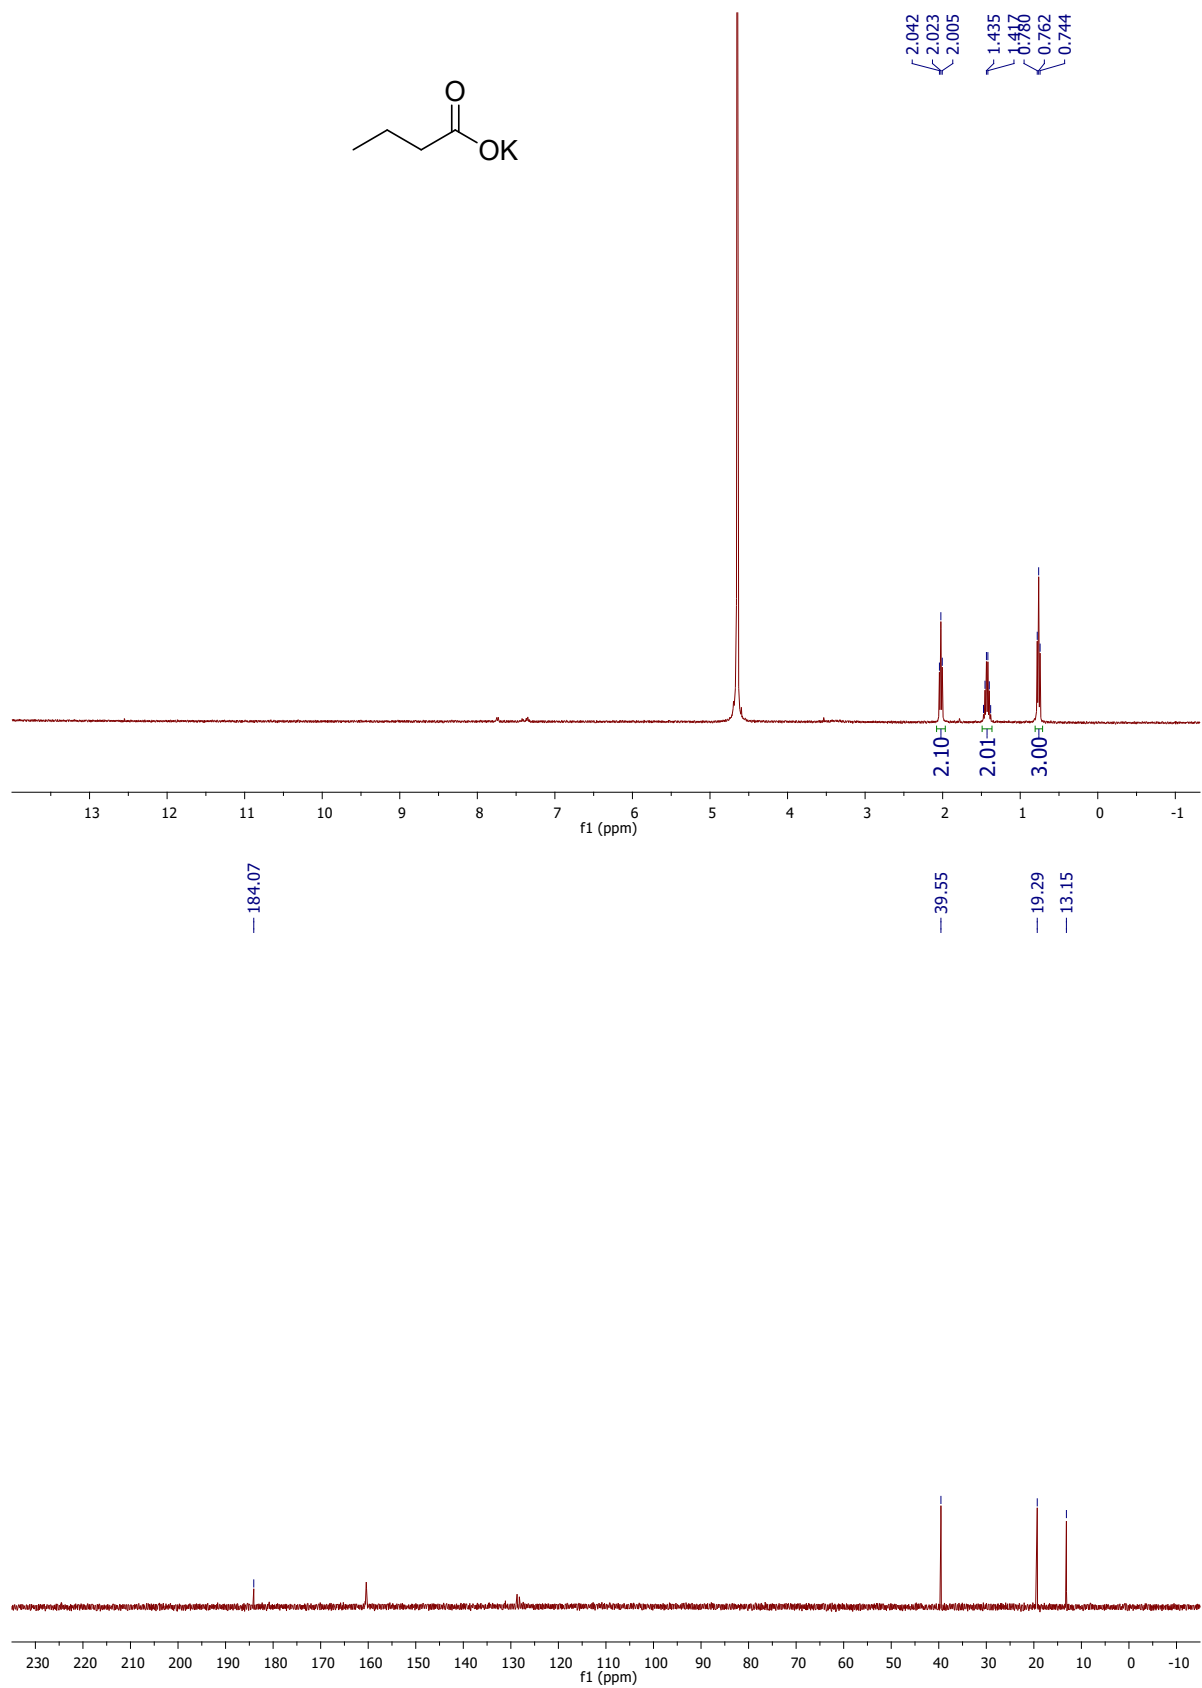

**Figure S19.**  $^1\text{H}$  (400 MHz,  $\text{D}_2\text{O}$ ) and  $^{13}\text{C}\{^1\text{H}\}$  (100.6 MHz,  $\text{D}_2\text{O}$ ) NMR spectra of **3r**

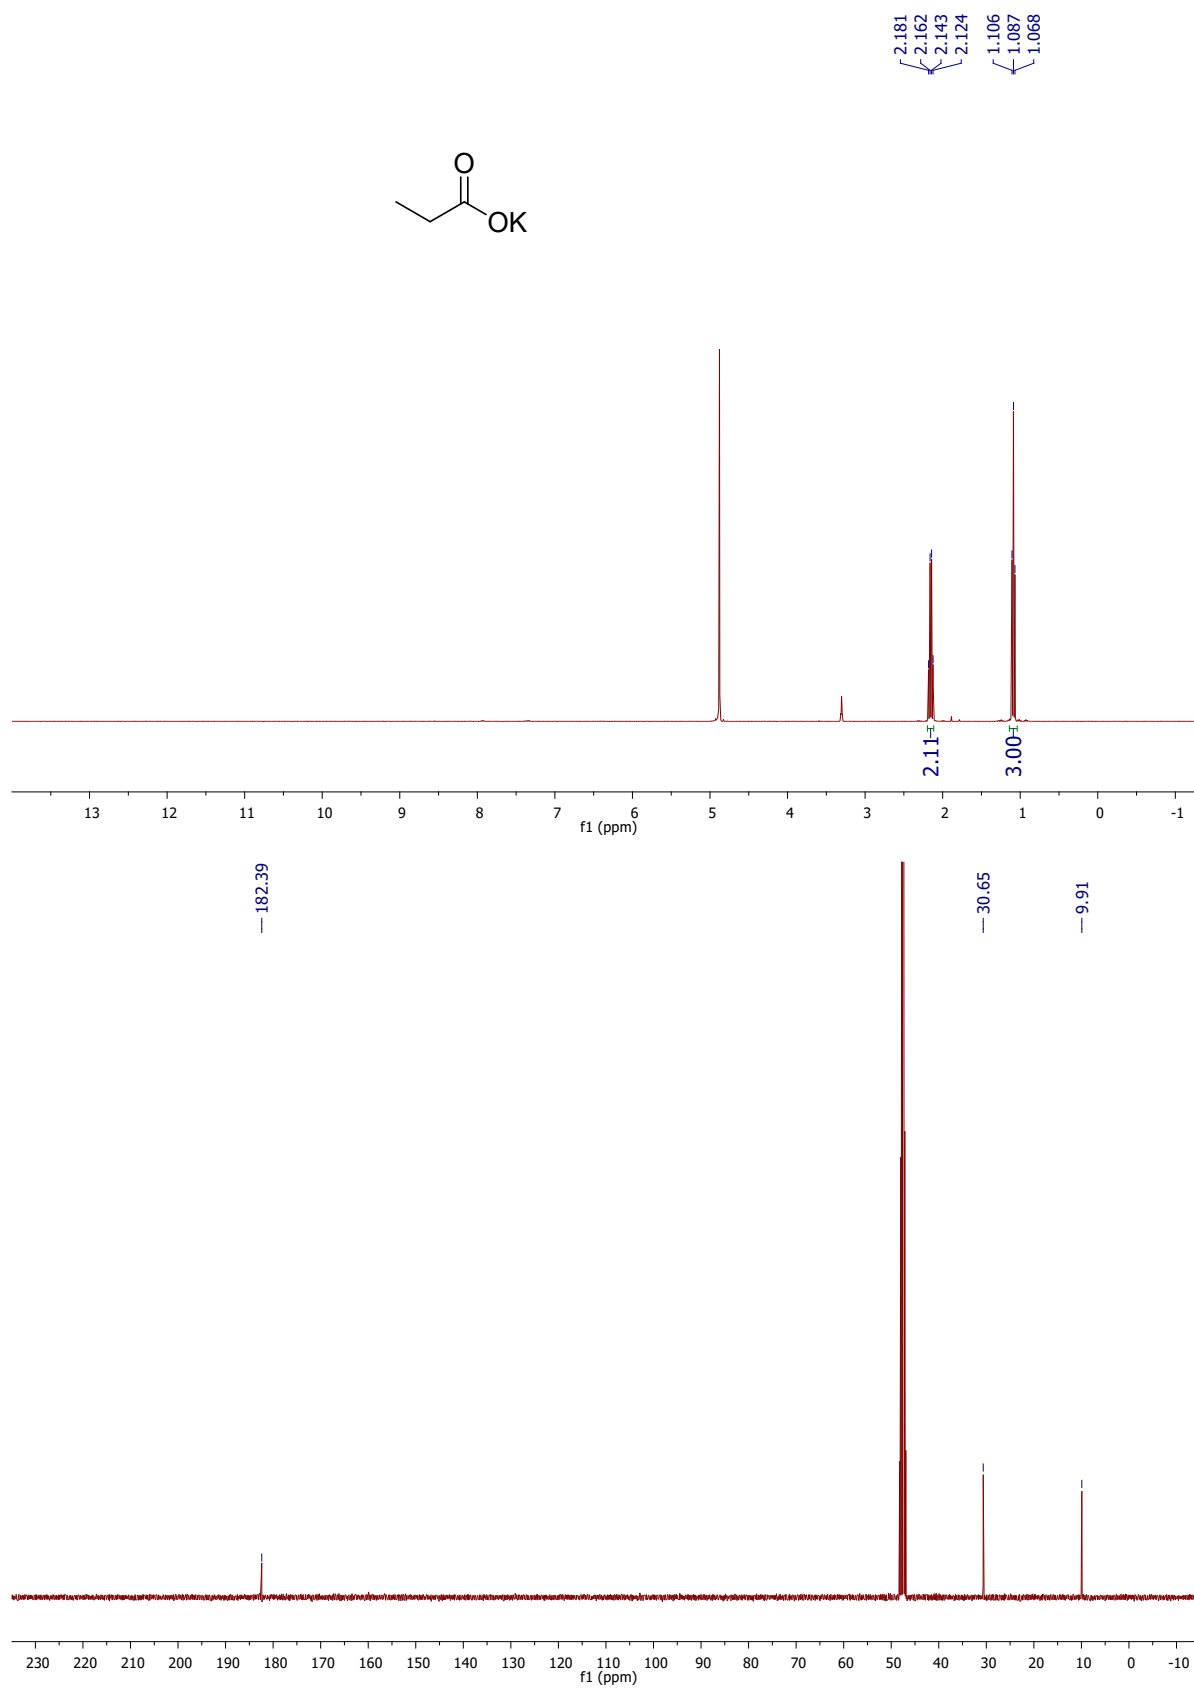

**Figure S20.**  $^1\text{H}$  (400 MHz,  $\text{CD}_3\text{OD}$ ) and  $^{13}\text{C}\{^1\text{H}\}$  (100.6 MHz,  $\text{CD}_3\text{OD}$ ) NMR spectra of **3s**

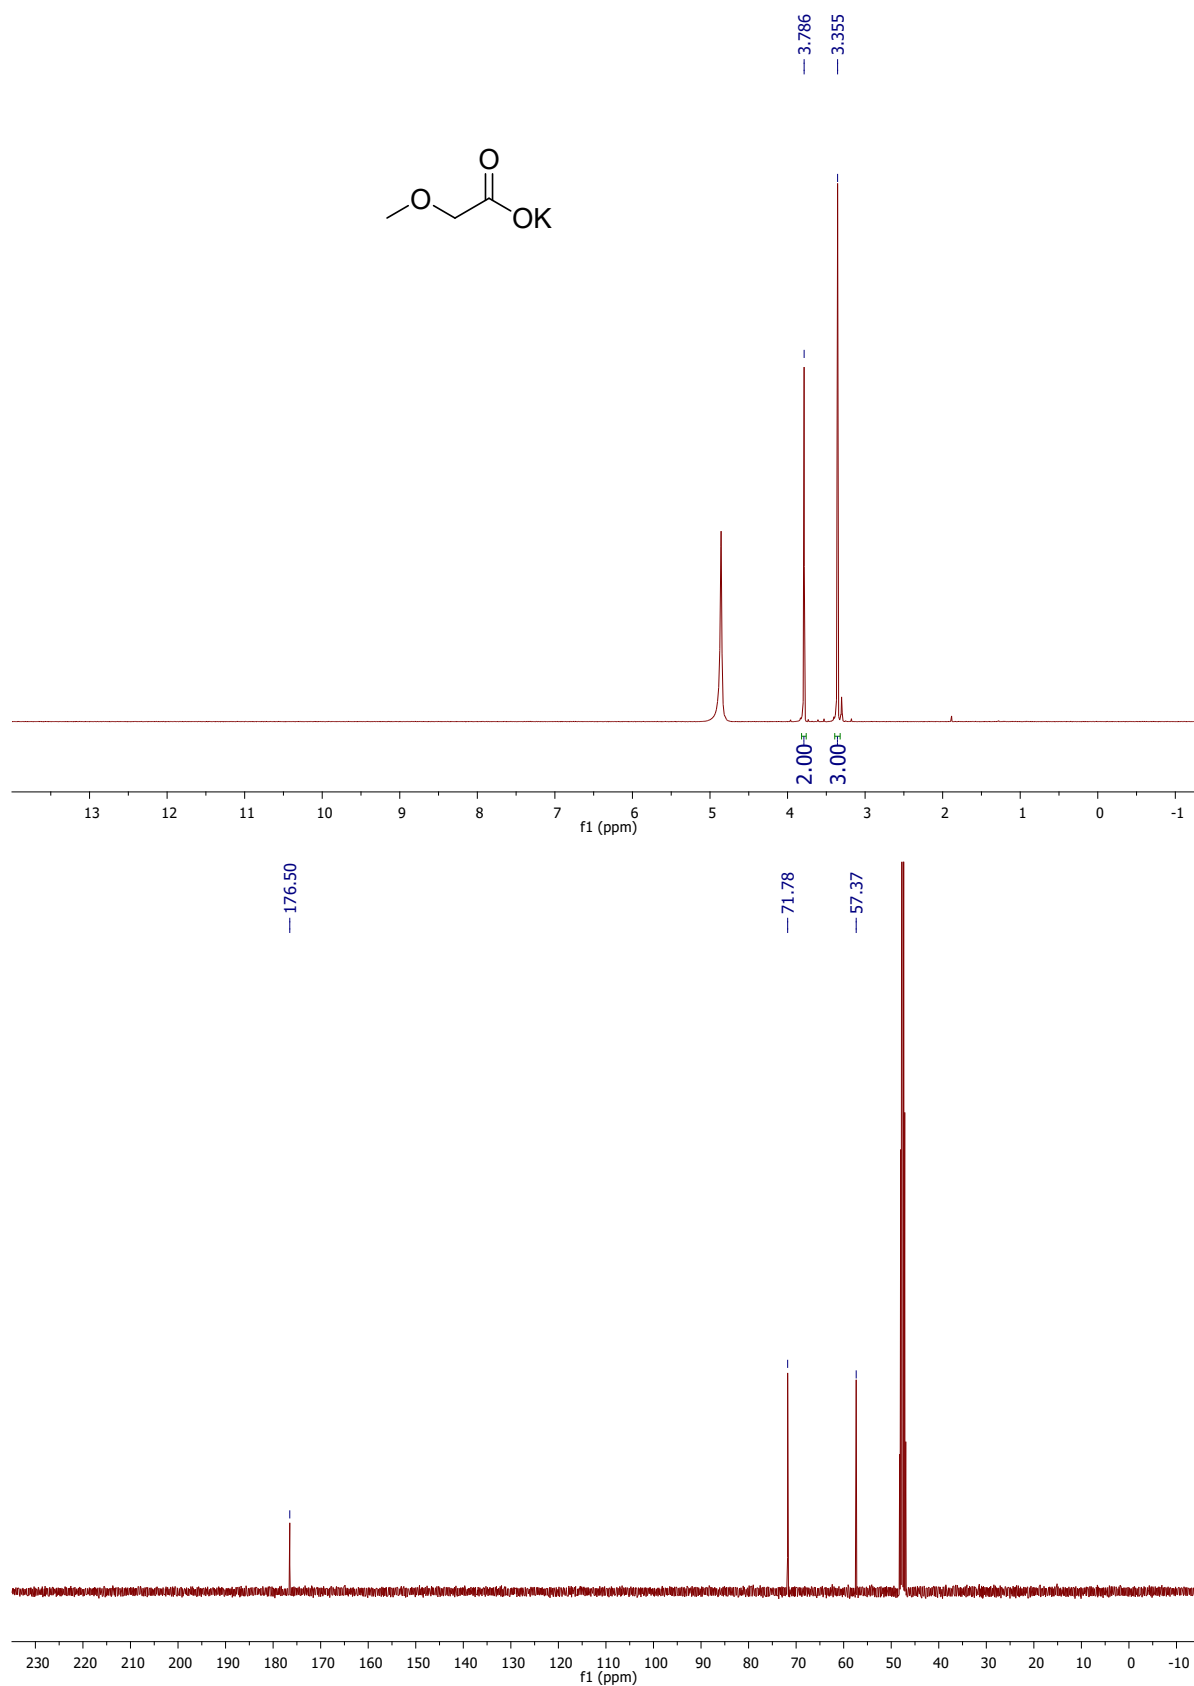

**Figure S21.** <sup>1</sup>H (400 MHz, CD<sub>3</sub>OD) and <sup>13</sup>C{<sup>1</sup>H} (100.6 MHz, CD<sub>3</sub>OD) NMR spectra of **3t**

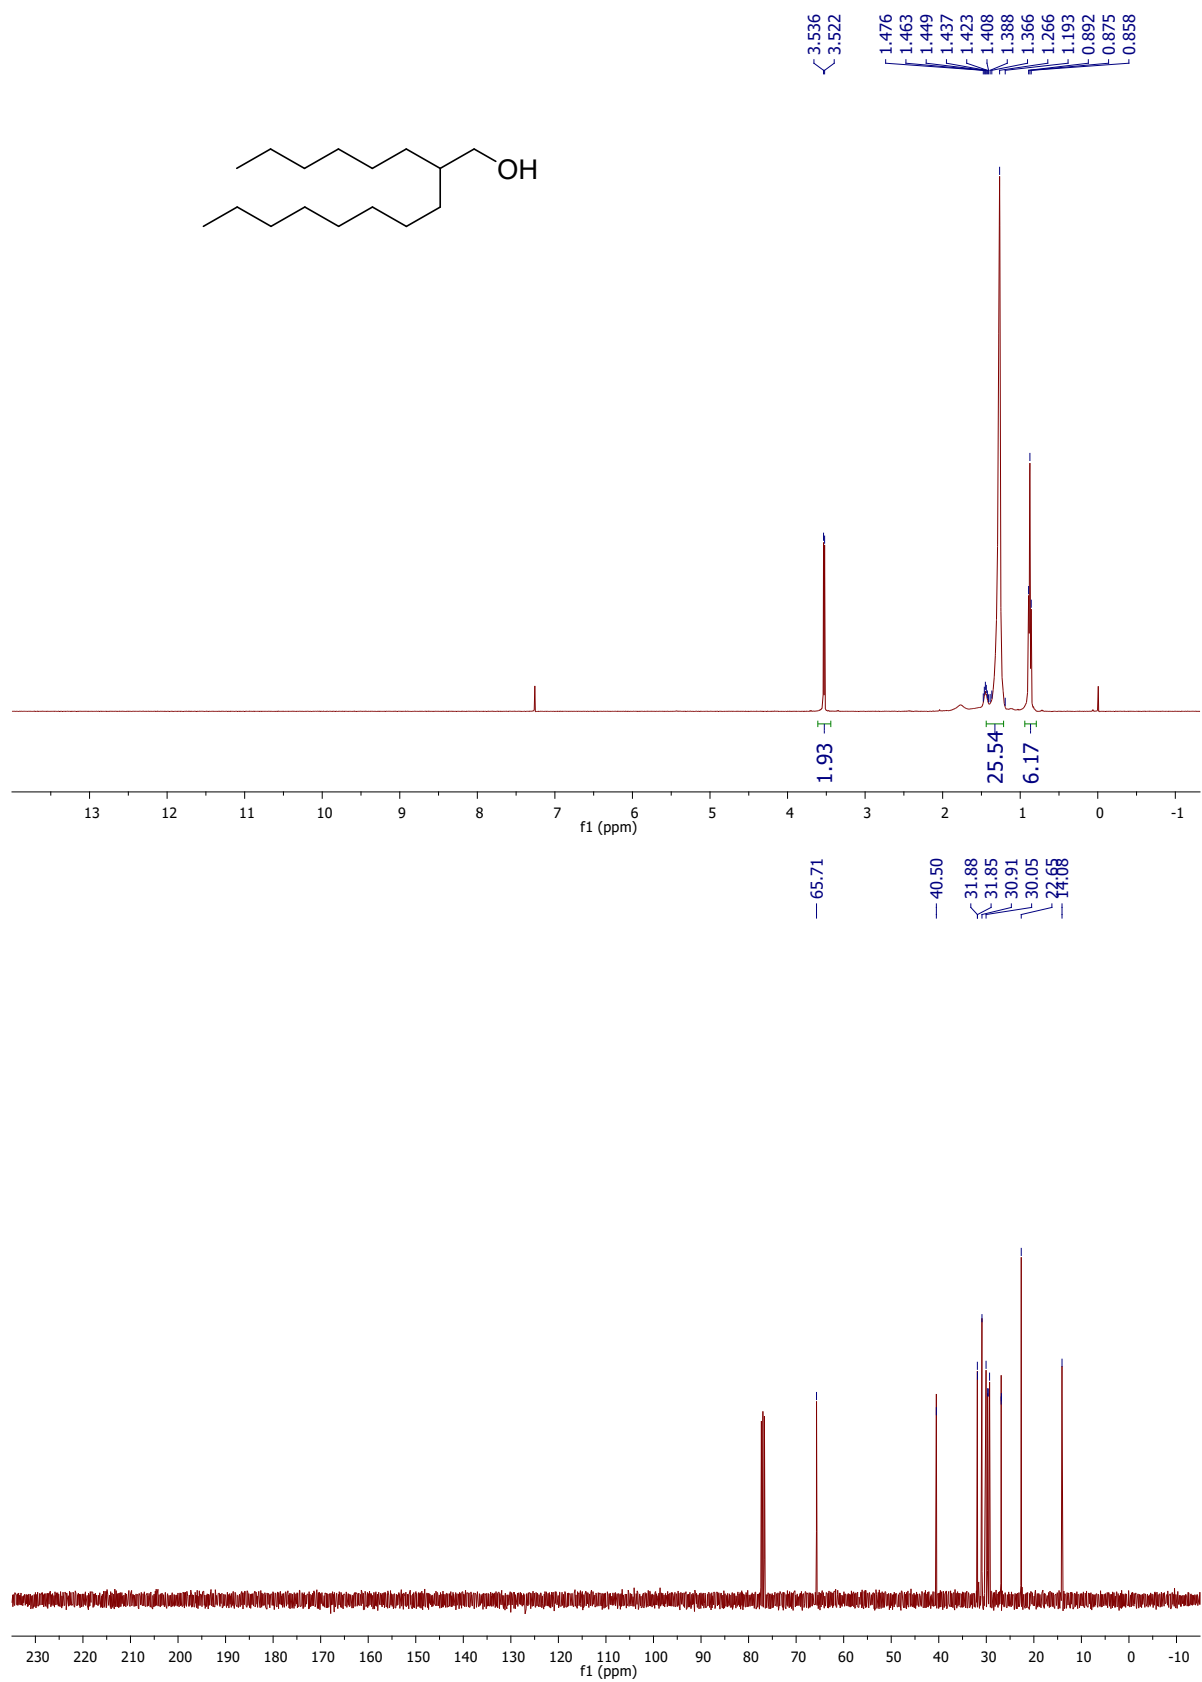

**Figure S22.** <sup>1</sup>H (400 MHz, CDCl<sub>3</sub>) and <sup>13</sup>C{<sup>1</sup>H} (100.6 MHz, CDCl<sub>3</sub>) NMR spectra of **4a**

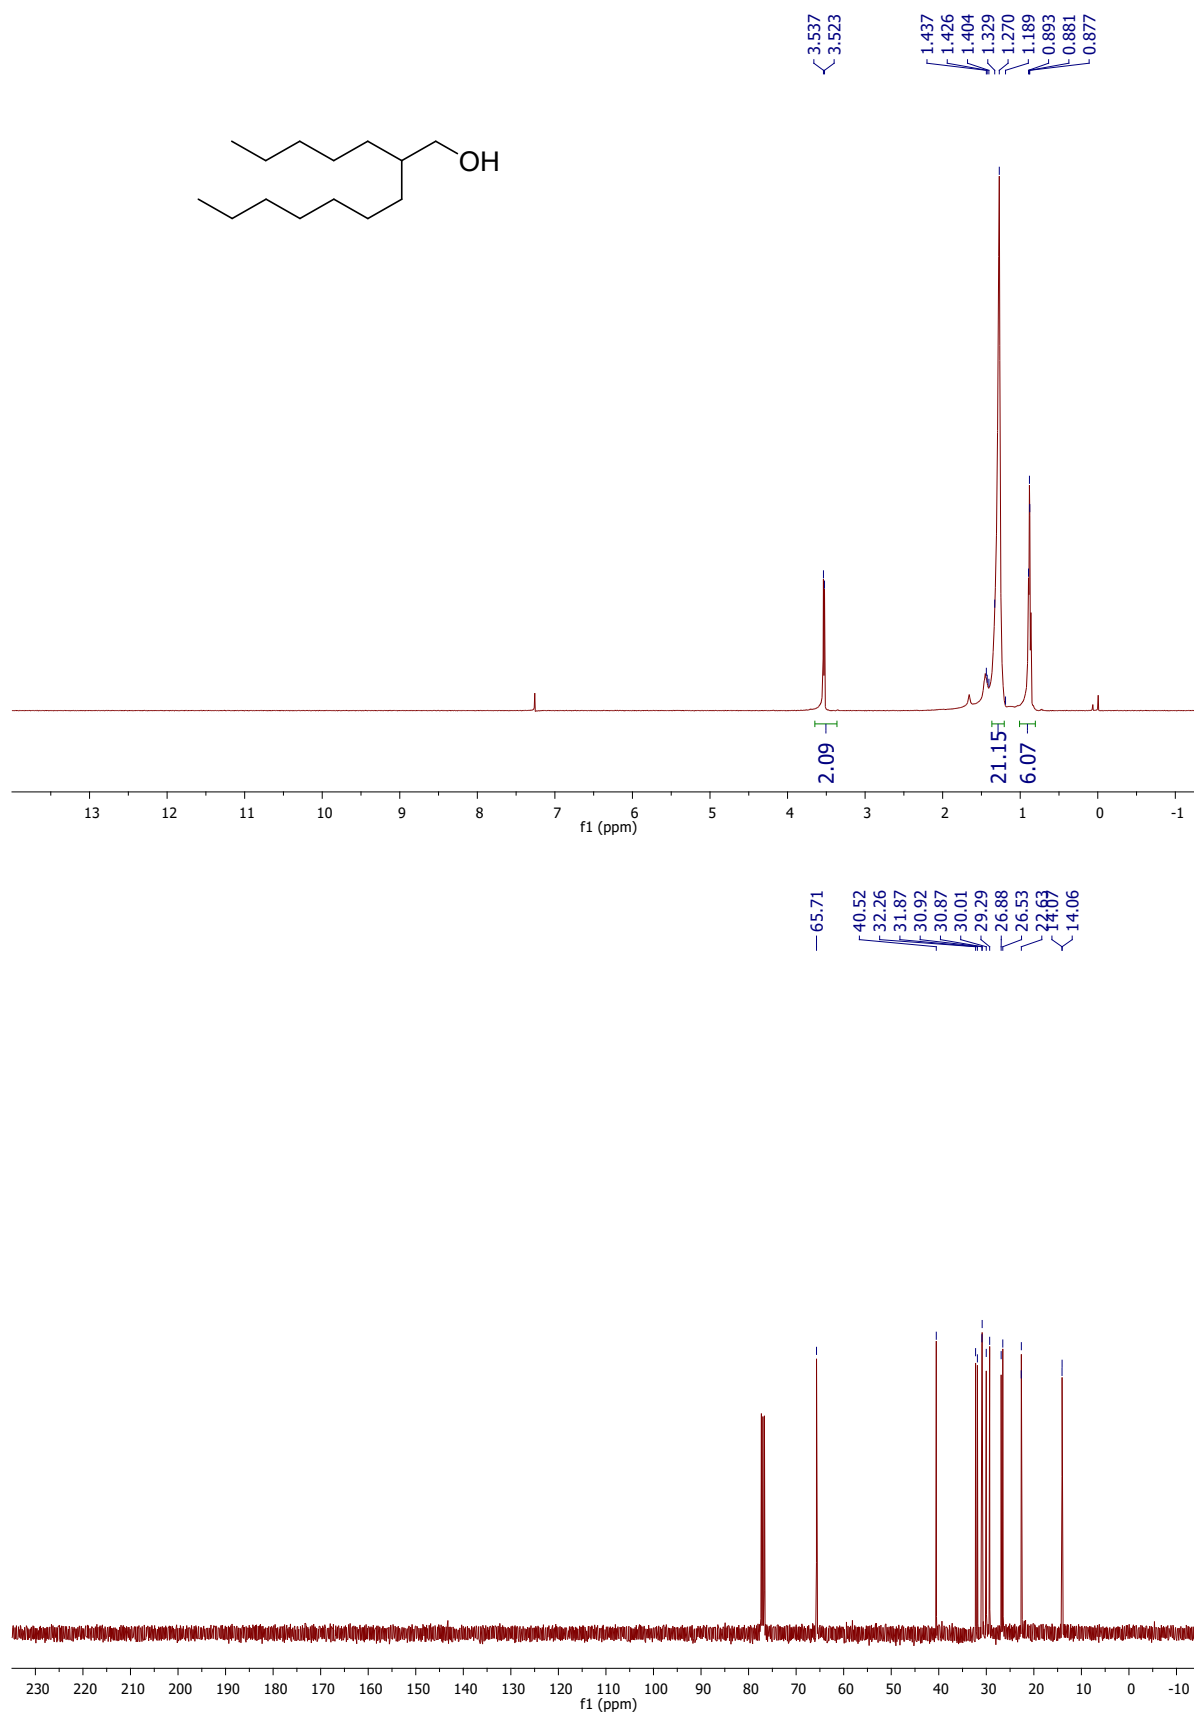

**Figure S23.**  $^1\text{H}$  (400 MHz,  $\text{CDCl}_3$ ) and  $^{13}\text{C}\{^1\text{H}\}$  (100.6 MHz,  $\text{CDCl}_3$ ) NMR spectra of **4b**



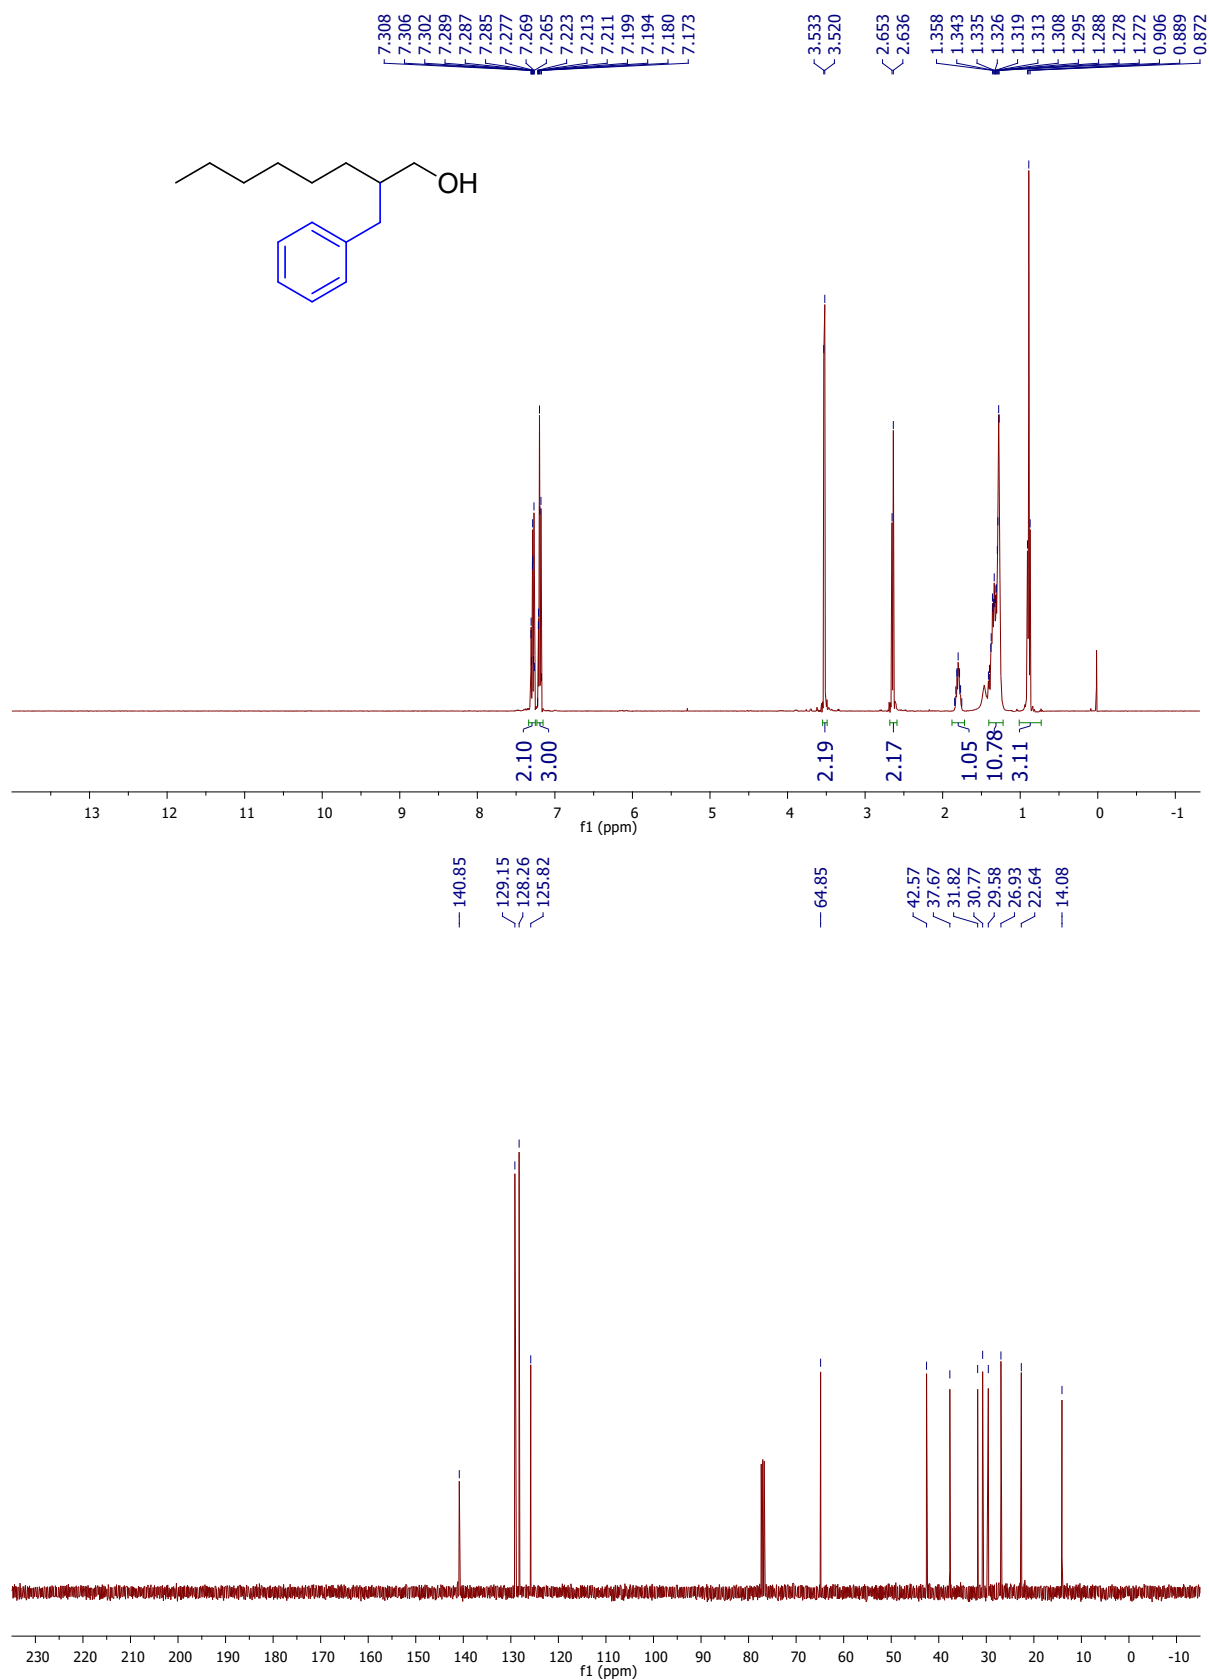

**Figure S24.** <sup>1</sup>H (400 MHz, CDCl<sub>3</sub>) and <sup>13</sup>C{<sup>1</sup>H} (100.6 MHz, CDCl<sub>3</sub>) NMR spectra of **5a**

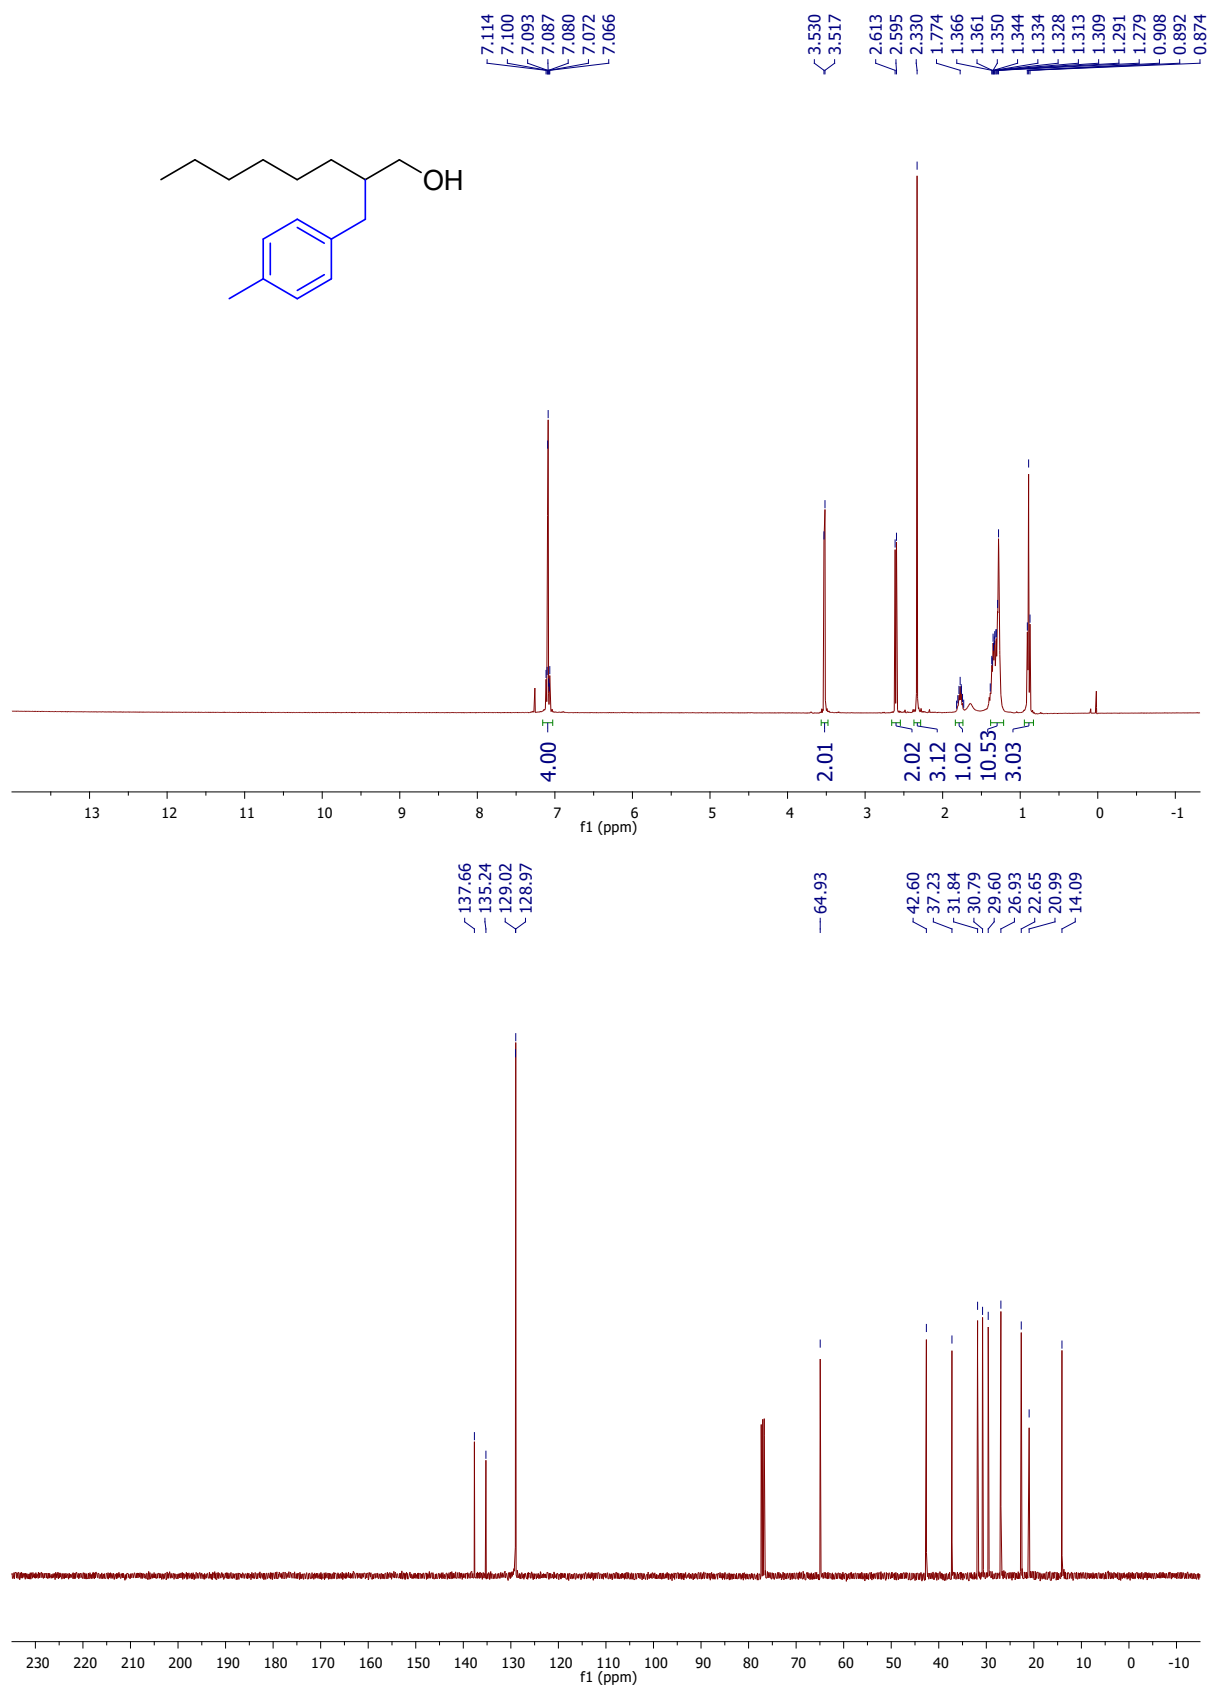

**Figure S25.**  $^1\text{H}$  (400 MHz,  $\text{CDCl}_3$ ) and  $^{13}\text{C}\{^1\text{H}\}$  (100.6 MHz,  $\text{CDCl}_3$ ) NMR spectra of **5b**

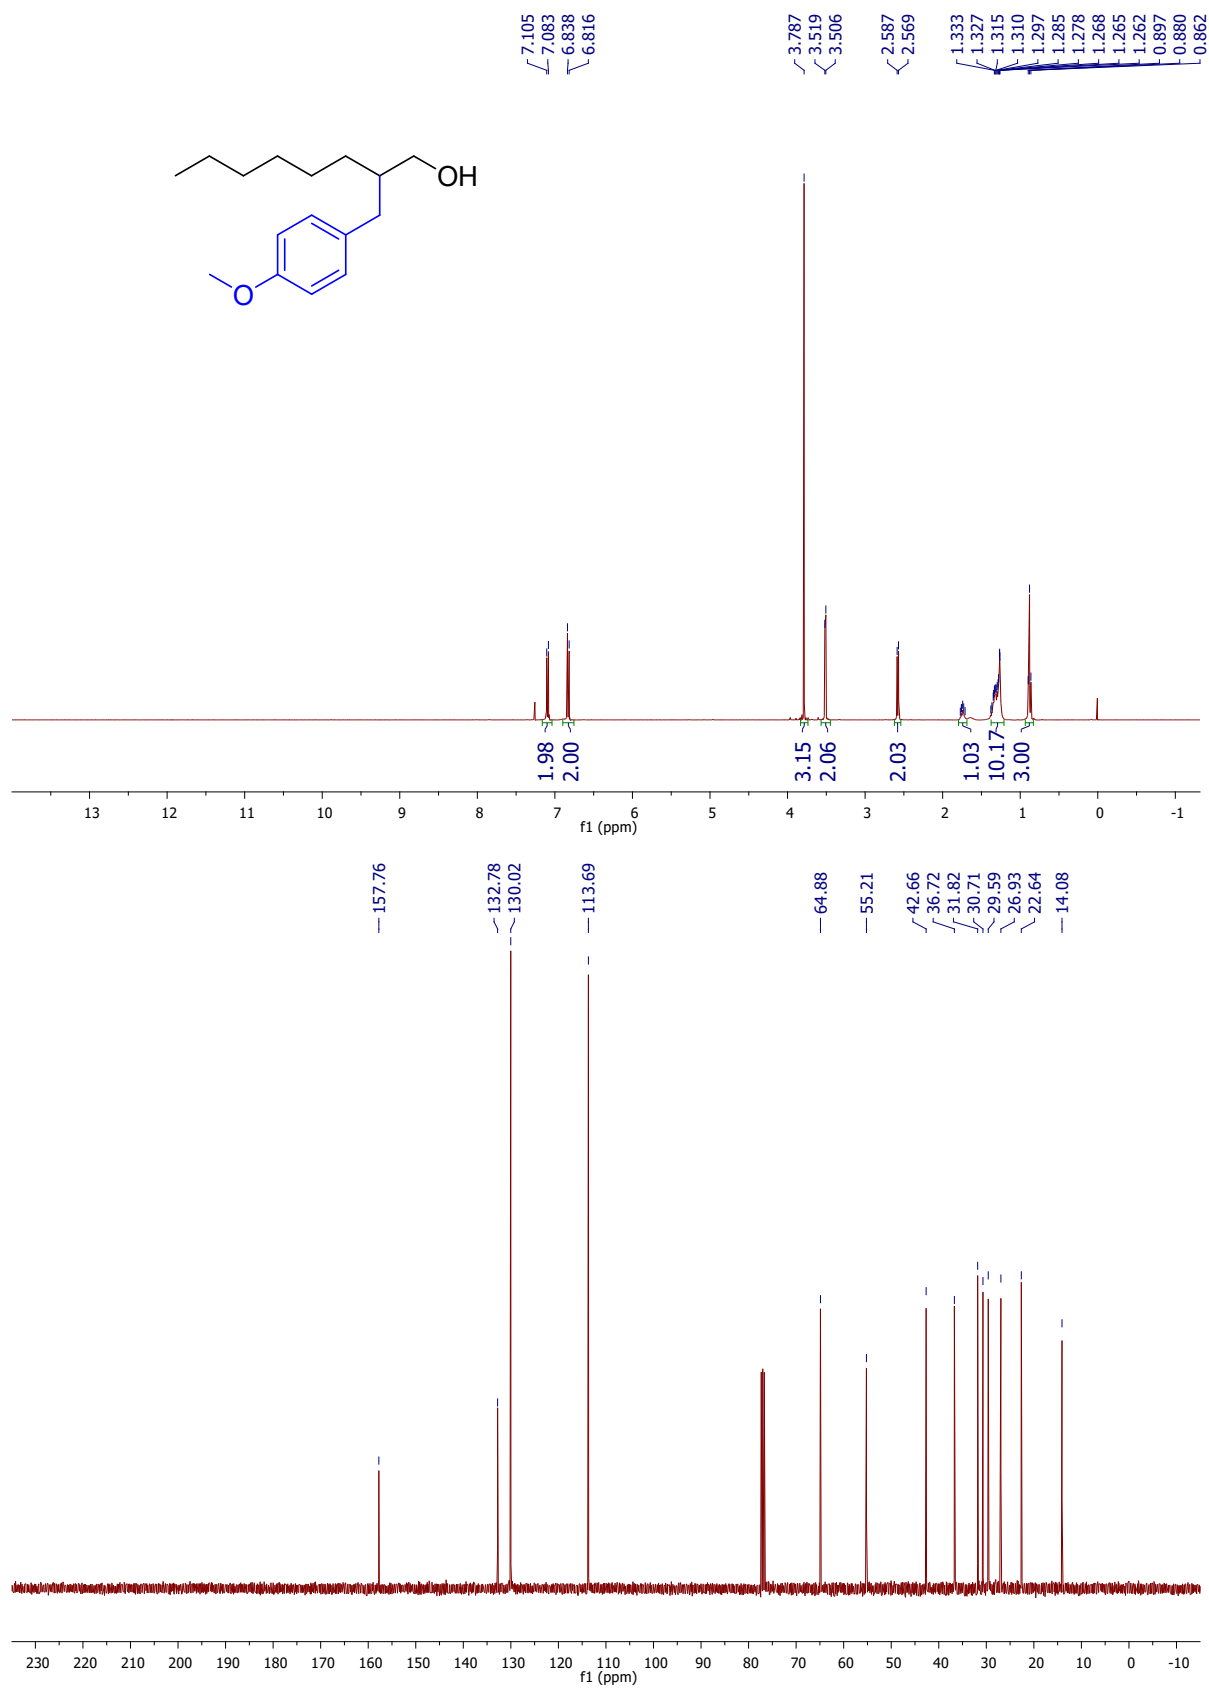

**Figure S26.**  $^1\text{H}$  (400 MHz,  $\text{CDCl}_3$ ) and  $^{13}\text{C}\{^1\text{H}\}$  (100.6 MHz,  $\text{CDCl}_3$ ) NMR spectra of **5c**

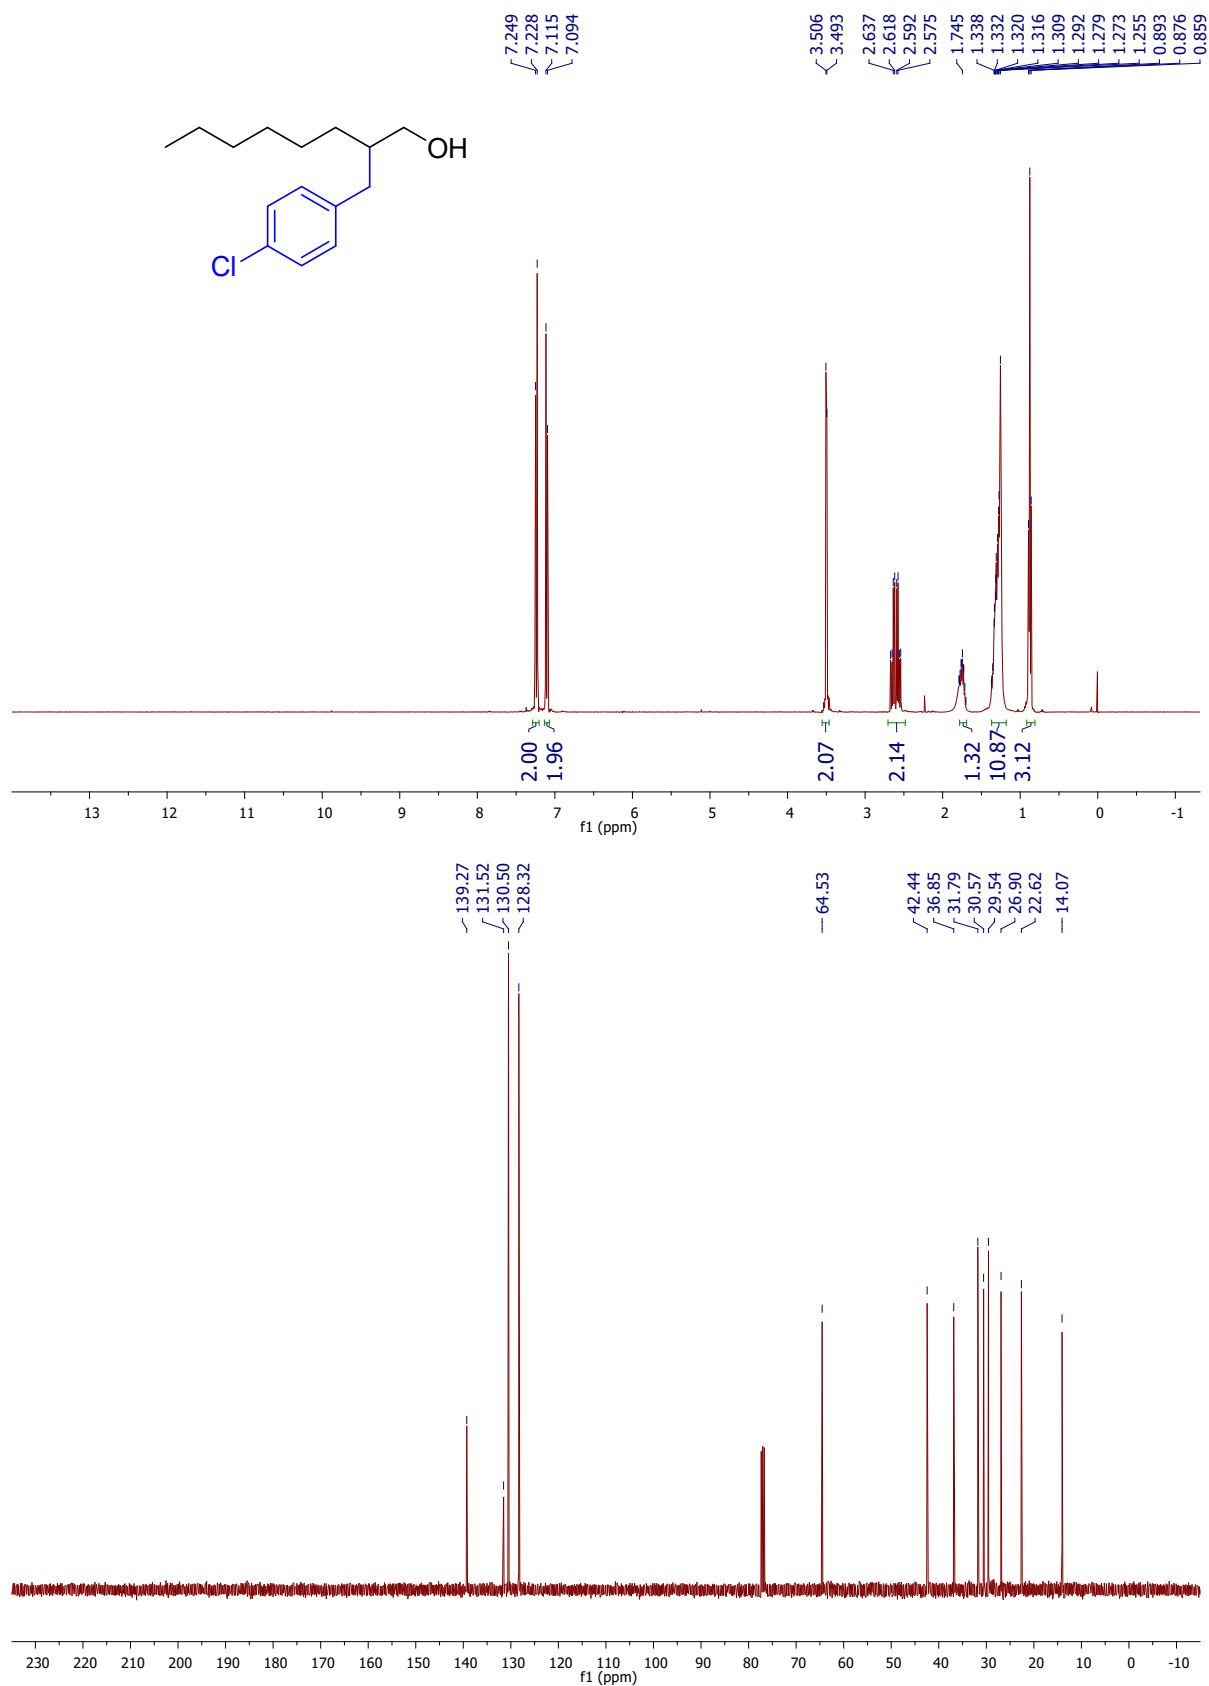

**Figure S27.** <sup>1</sup>H (400 MHz, CDCl<sub>3</sub>) and <sup>13</sup>C{<sup>1</sup>H} (100.6 MHz, CDCl<sub>3</sub>) NMR spectra of **5d**

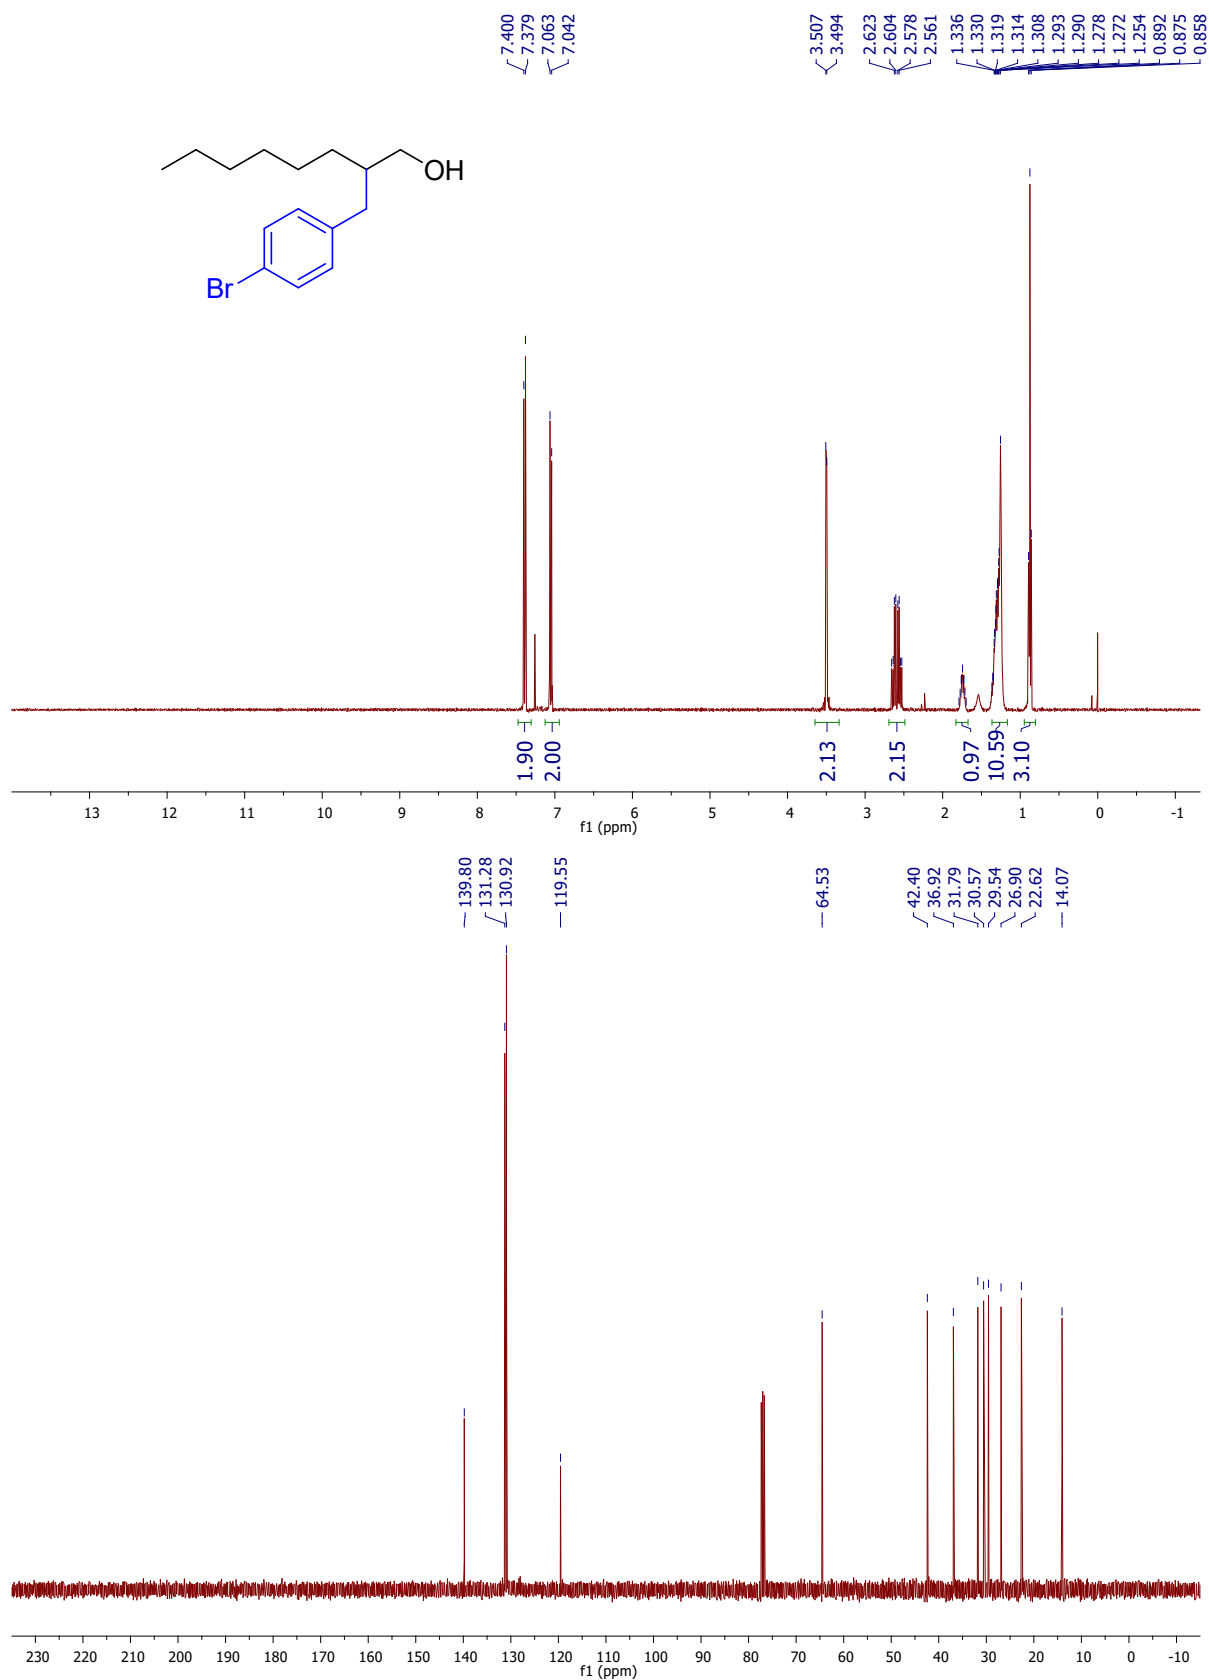

**Figure S28.**  $^1\text{H}$  (400 MHz,  $\text{CDCl}_3$ ) and  $^{13}\text{C}\{^1\text{H}\}$  (100.6 MHz,  $\text{CDCl}_3$ ) NMR spectra of **5e**

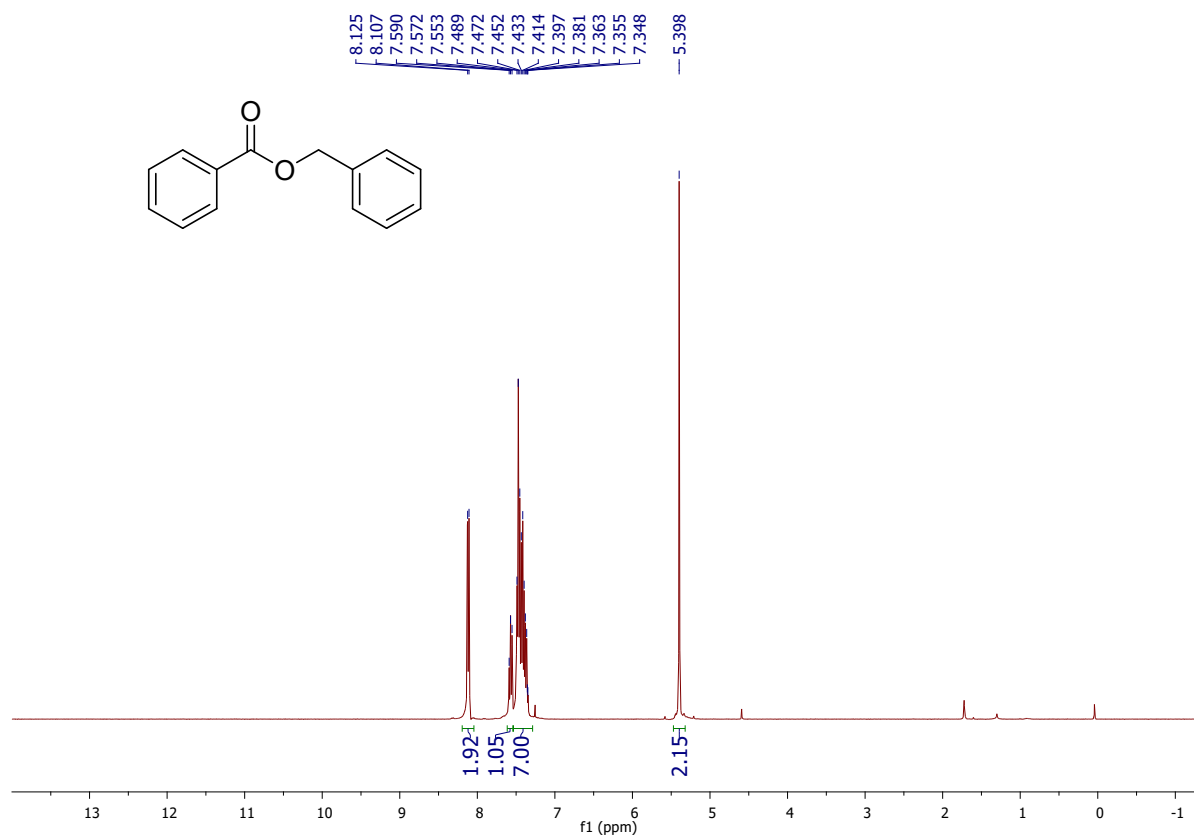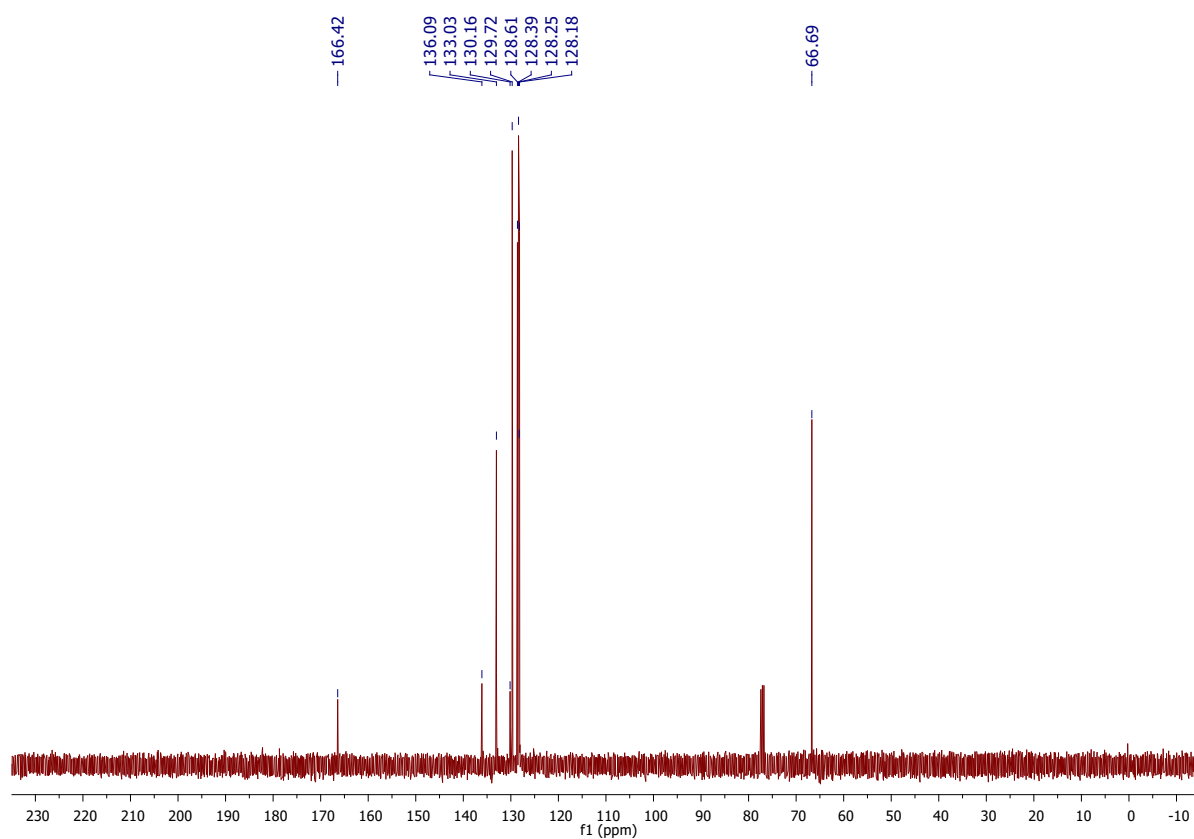

**Figure S29.** <sup>1</sup>H (400 MHz, CDCl<sub>3</sub>) and <sup>13</sup>C{<sup>1</sup>H} (100.6 MHz, CDCl<sub>3</sub>) NMR spectra of **6a**

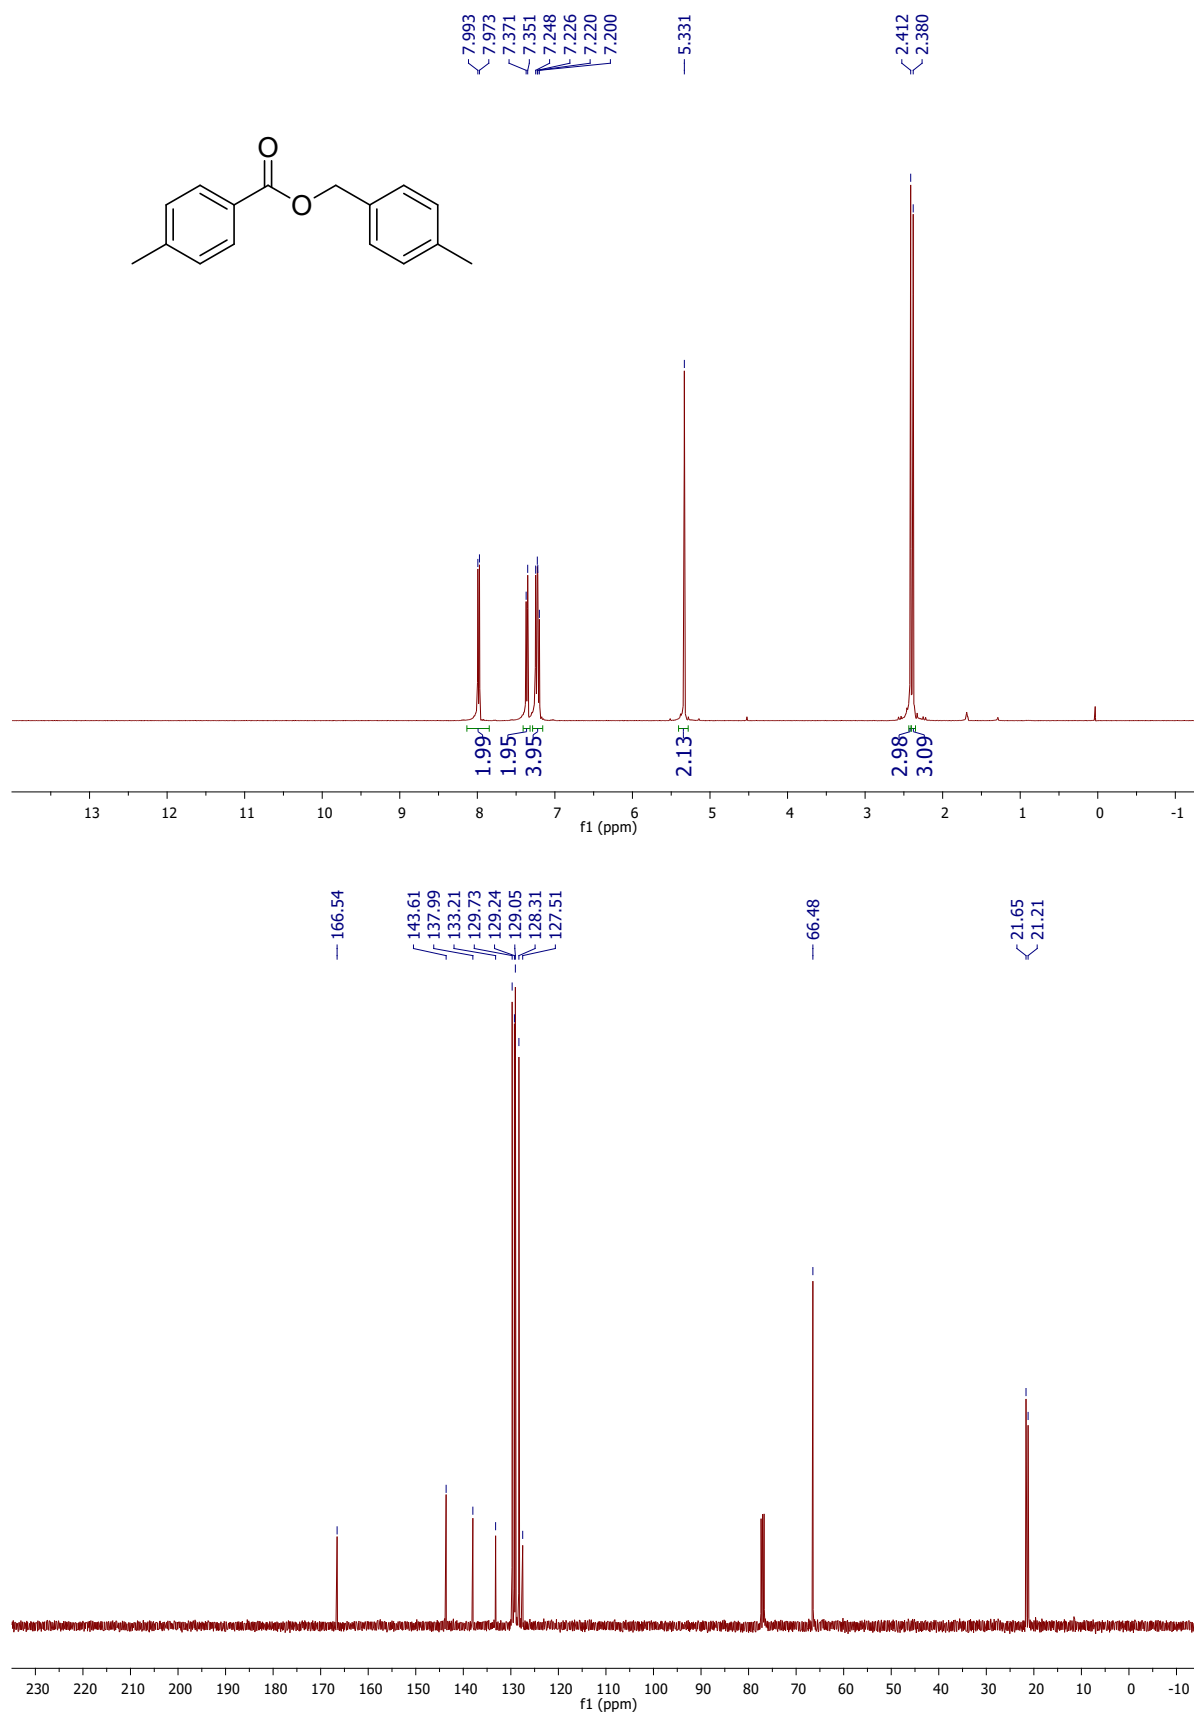

**Figure S30.** <sup>1</sup>H (400 MHz, CDCl<sub>3</sub>) and <sup>13</sup>C{<sup>1</sup>H} (100.6 MHz, CDCl<sub>3</sub>) NMR spectra of **6b**

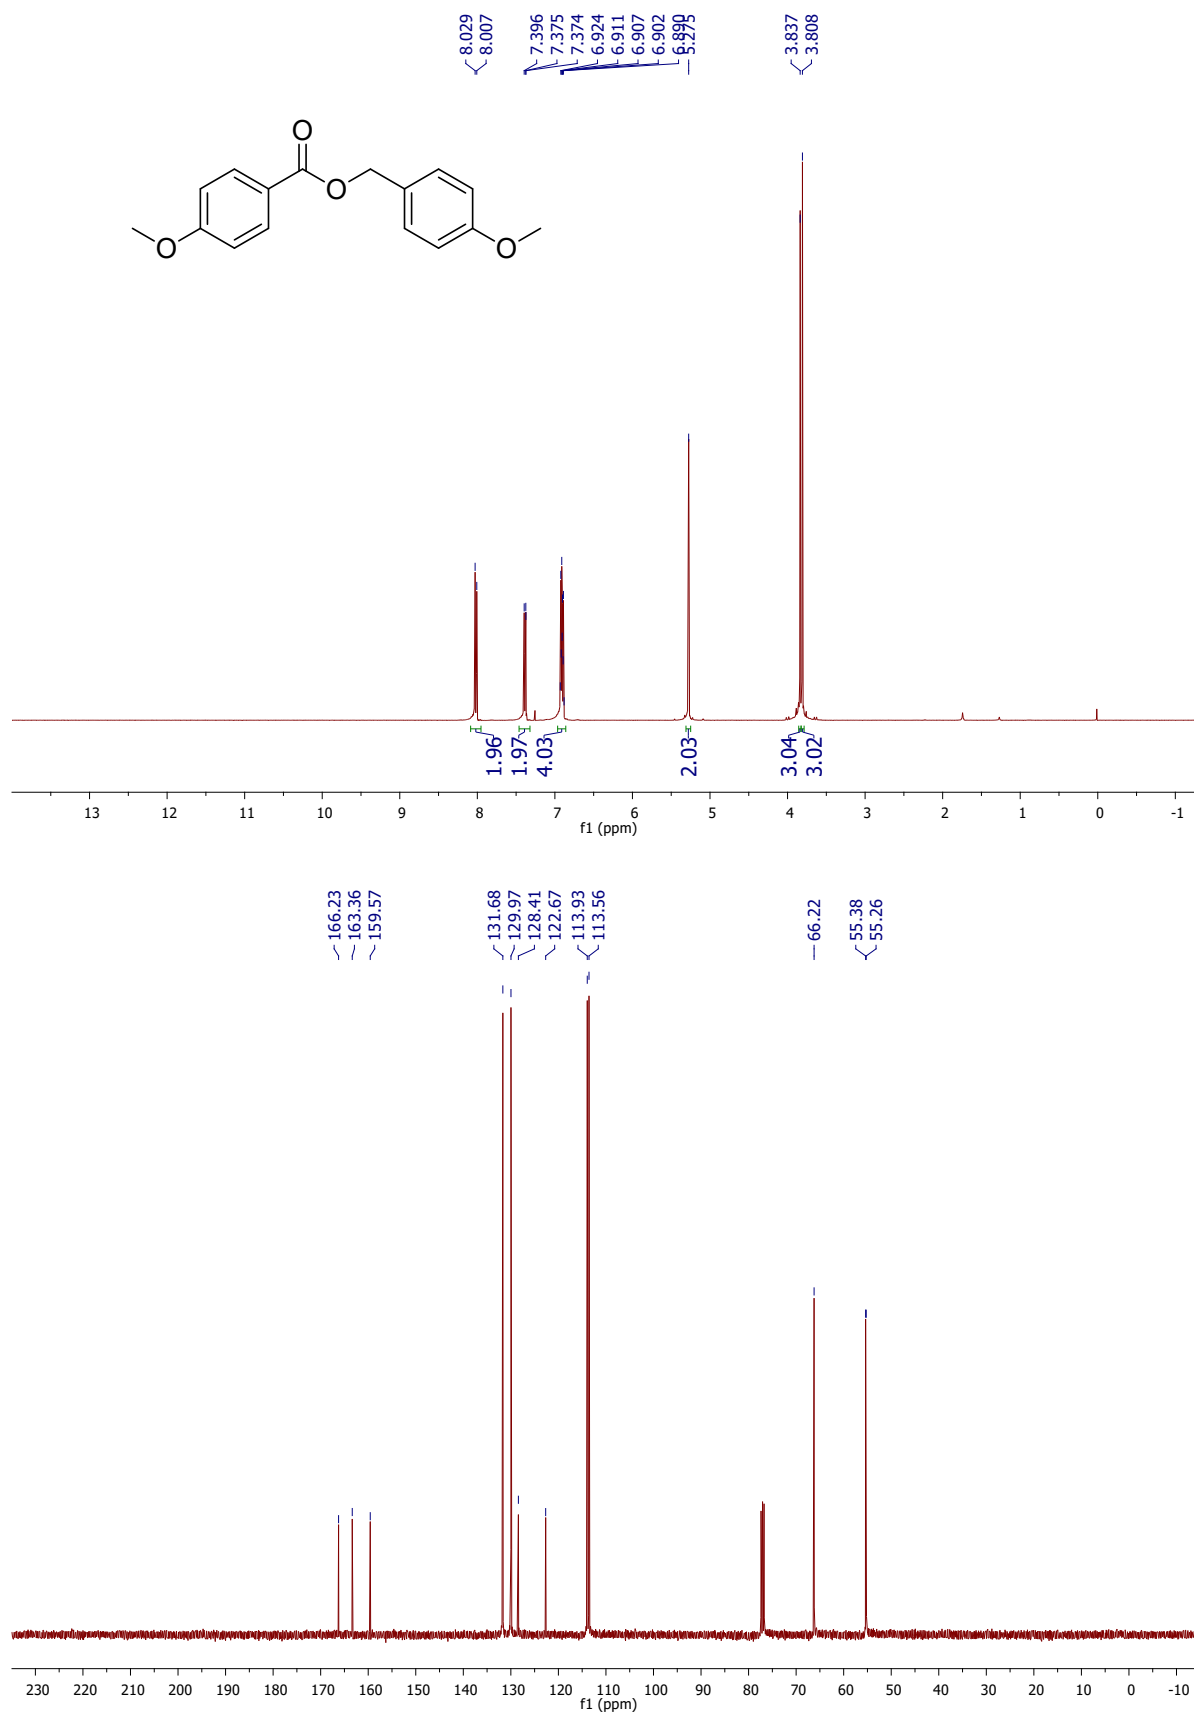

Figure S31. <sup>1</sup>H (400 MHz, CDCl<sub>3</sub>) and <sup>13</sup>C{<sup>1</sup>H} (100.6 MHz, CDCl<sub>3</sub>) NMR spectra of 6c



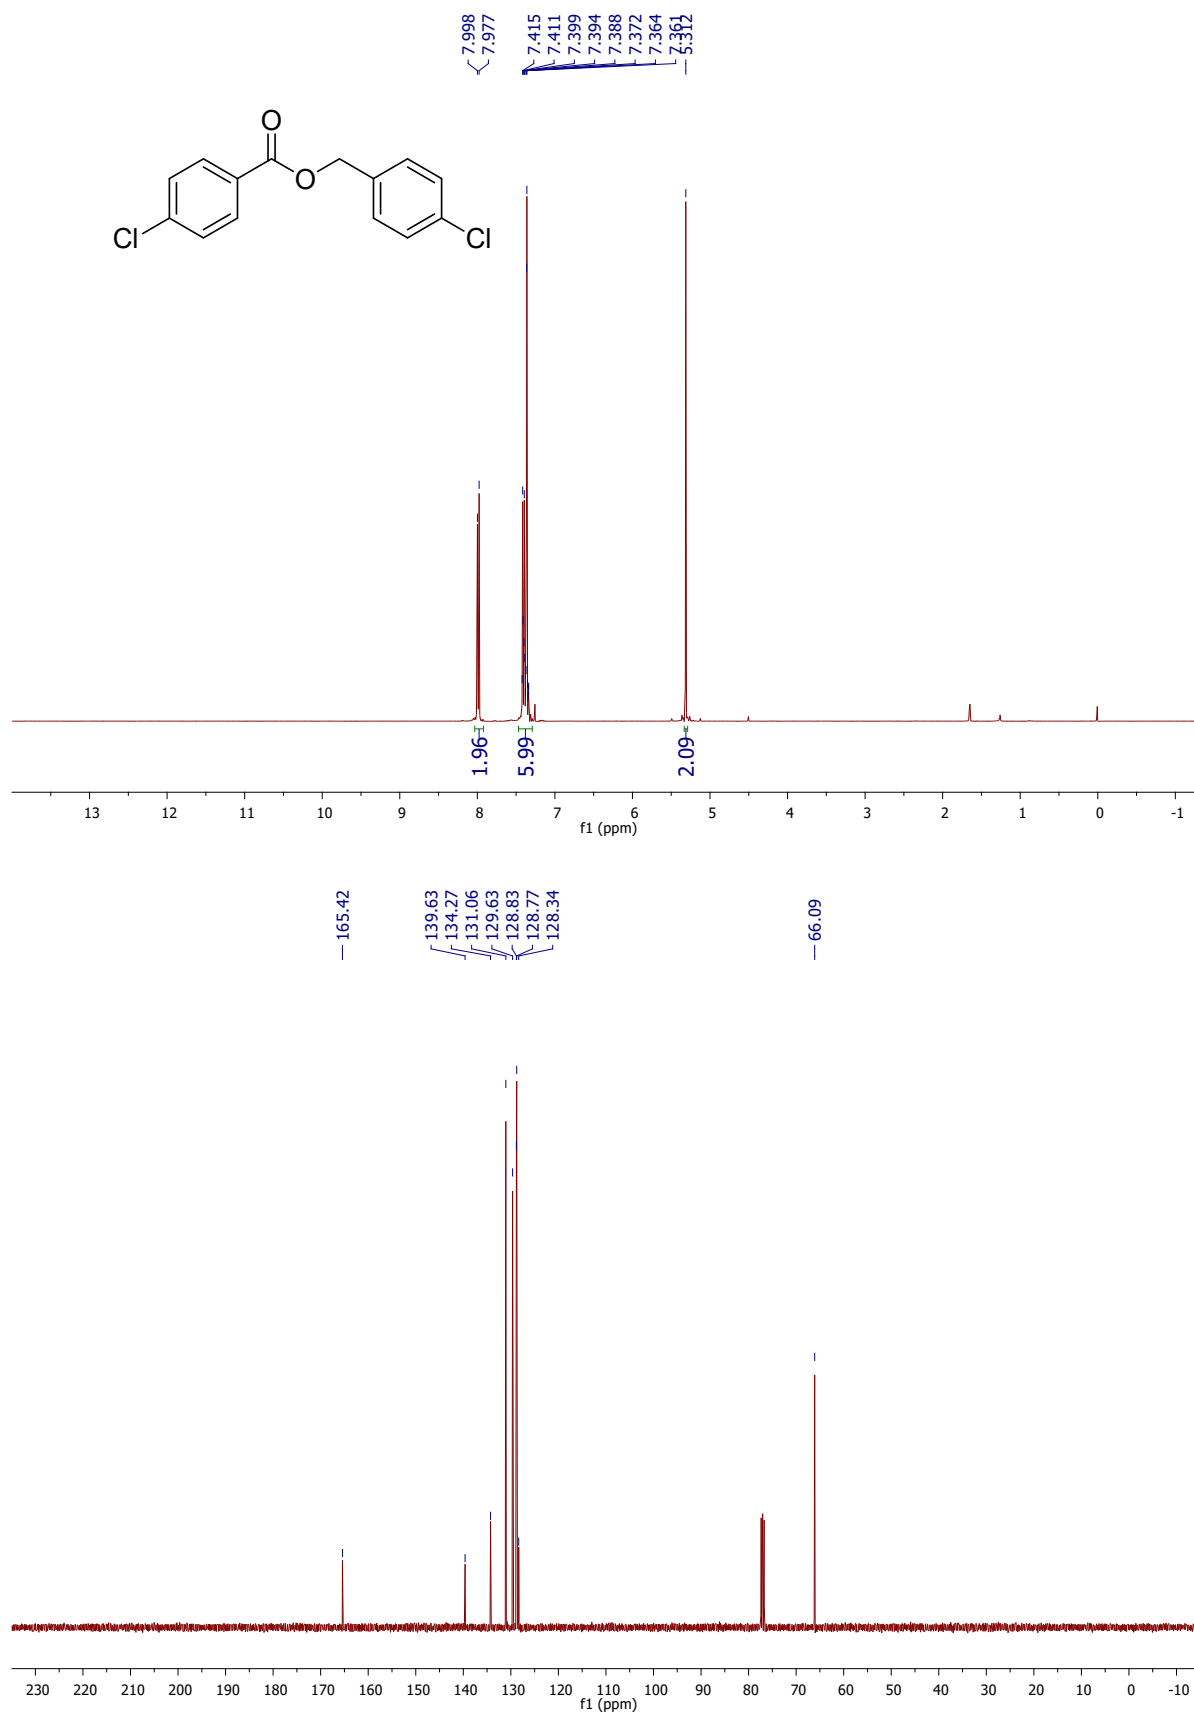

**Figure S32.** <sup>1</sup>H (400 MHz, CDCl<sub>3</sub>) and <sup>13</sup>C{<sup>1</sup>H} (100.6 MHz, CDCl<sub>3</sub>) NMR spectra of **6d**

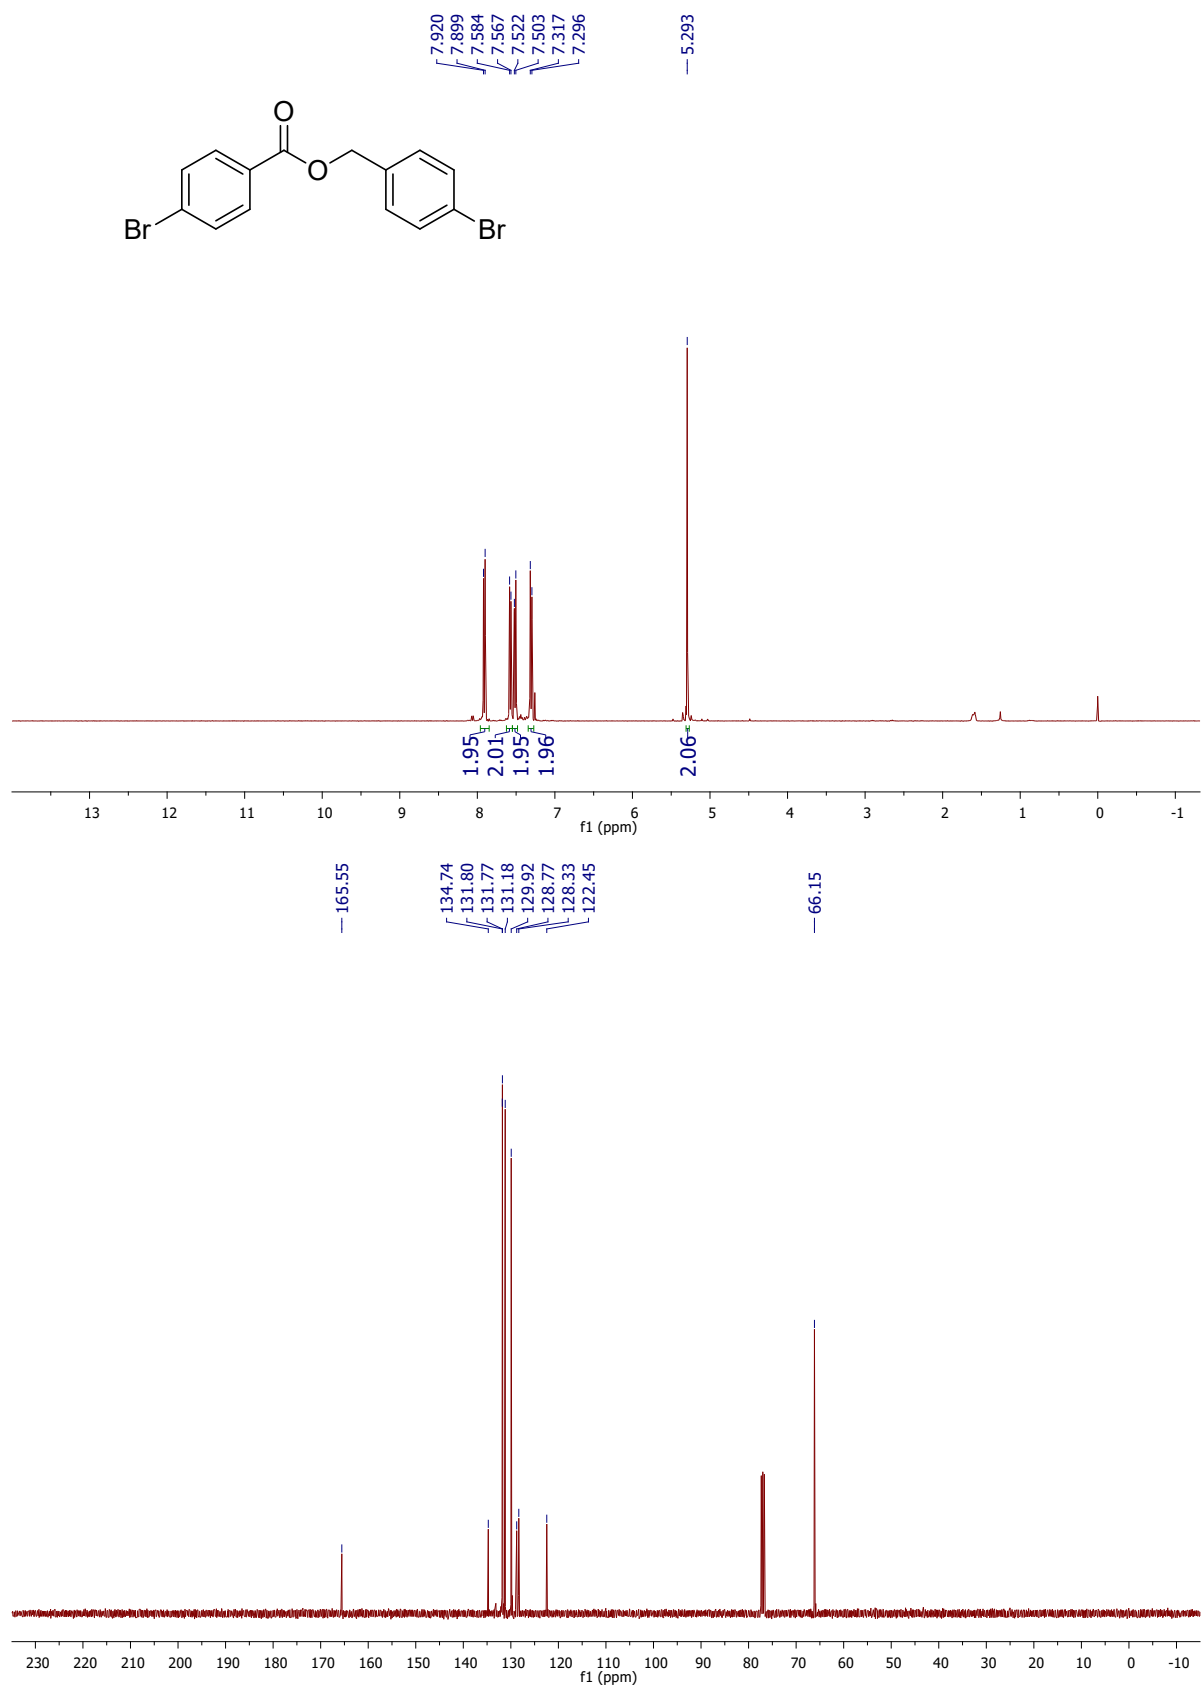

**Figure S33.**  $^1\text{H}$  (400 MHz,  $\text{CDCl}_3$ ) and  $^{13}\text{C}\{^1\text{H}\}$  (100.6 MHz,  $\text{CDCl}_3$ ) NMR spectra of **6e**

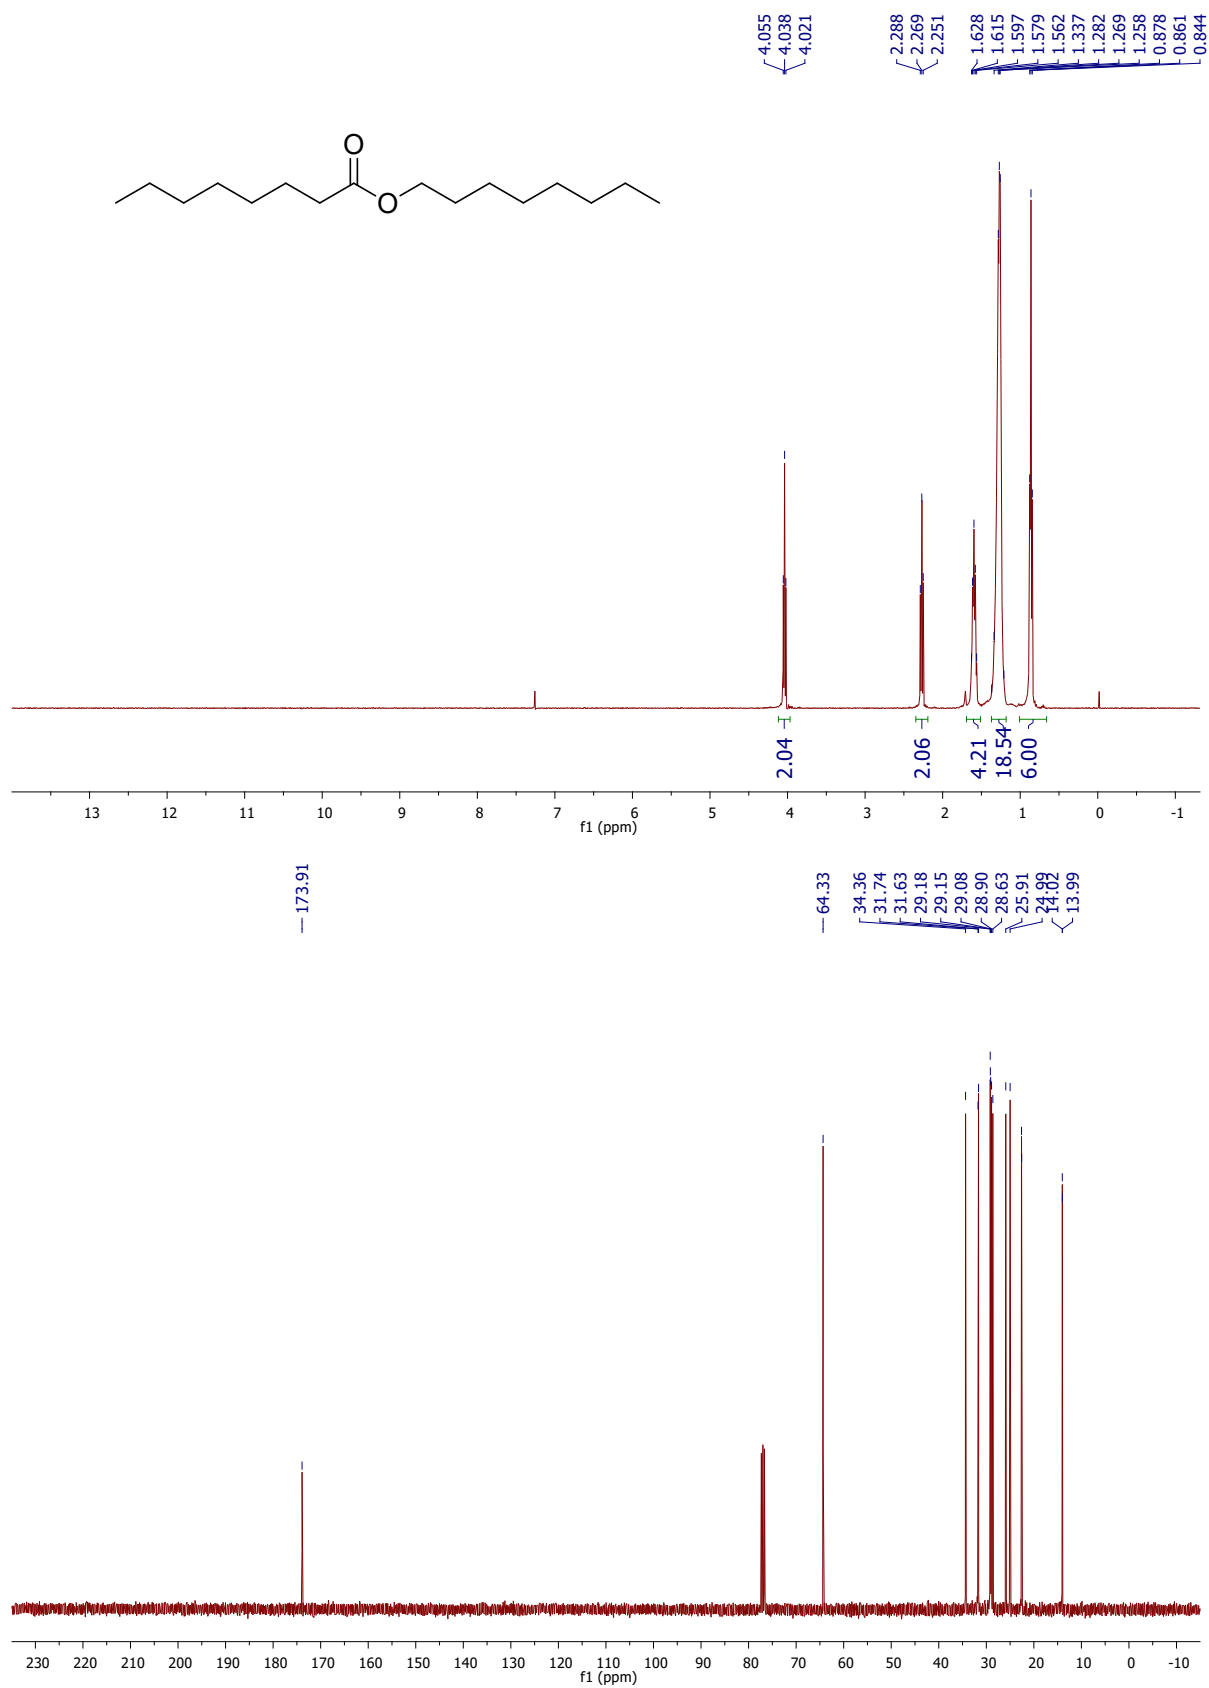

**Figure S34.** <sup>1</sup>H (400 MHz, CDCl<sub>3</sub>) and <sup>13</sup>C{<sup>1</sup>H} (100.6 MHz, CDCl<sub>3</sub>) NMR spectra of **6f**

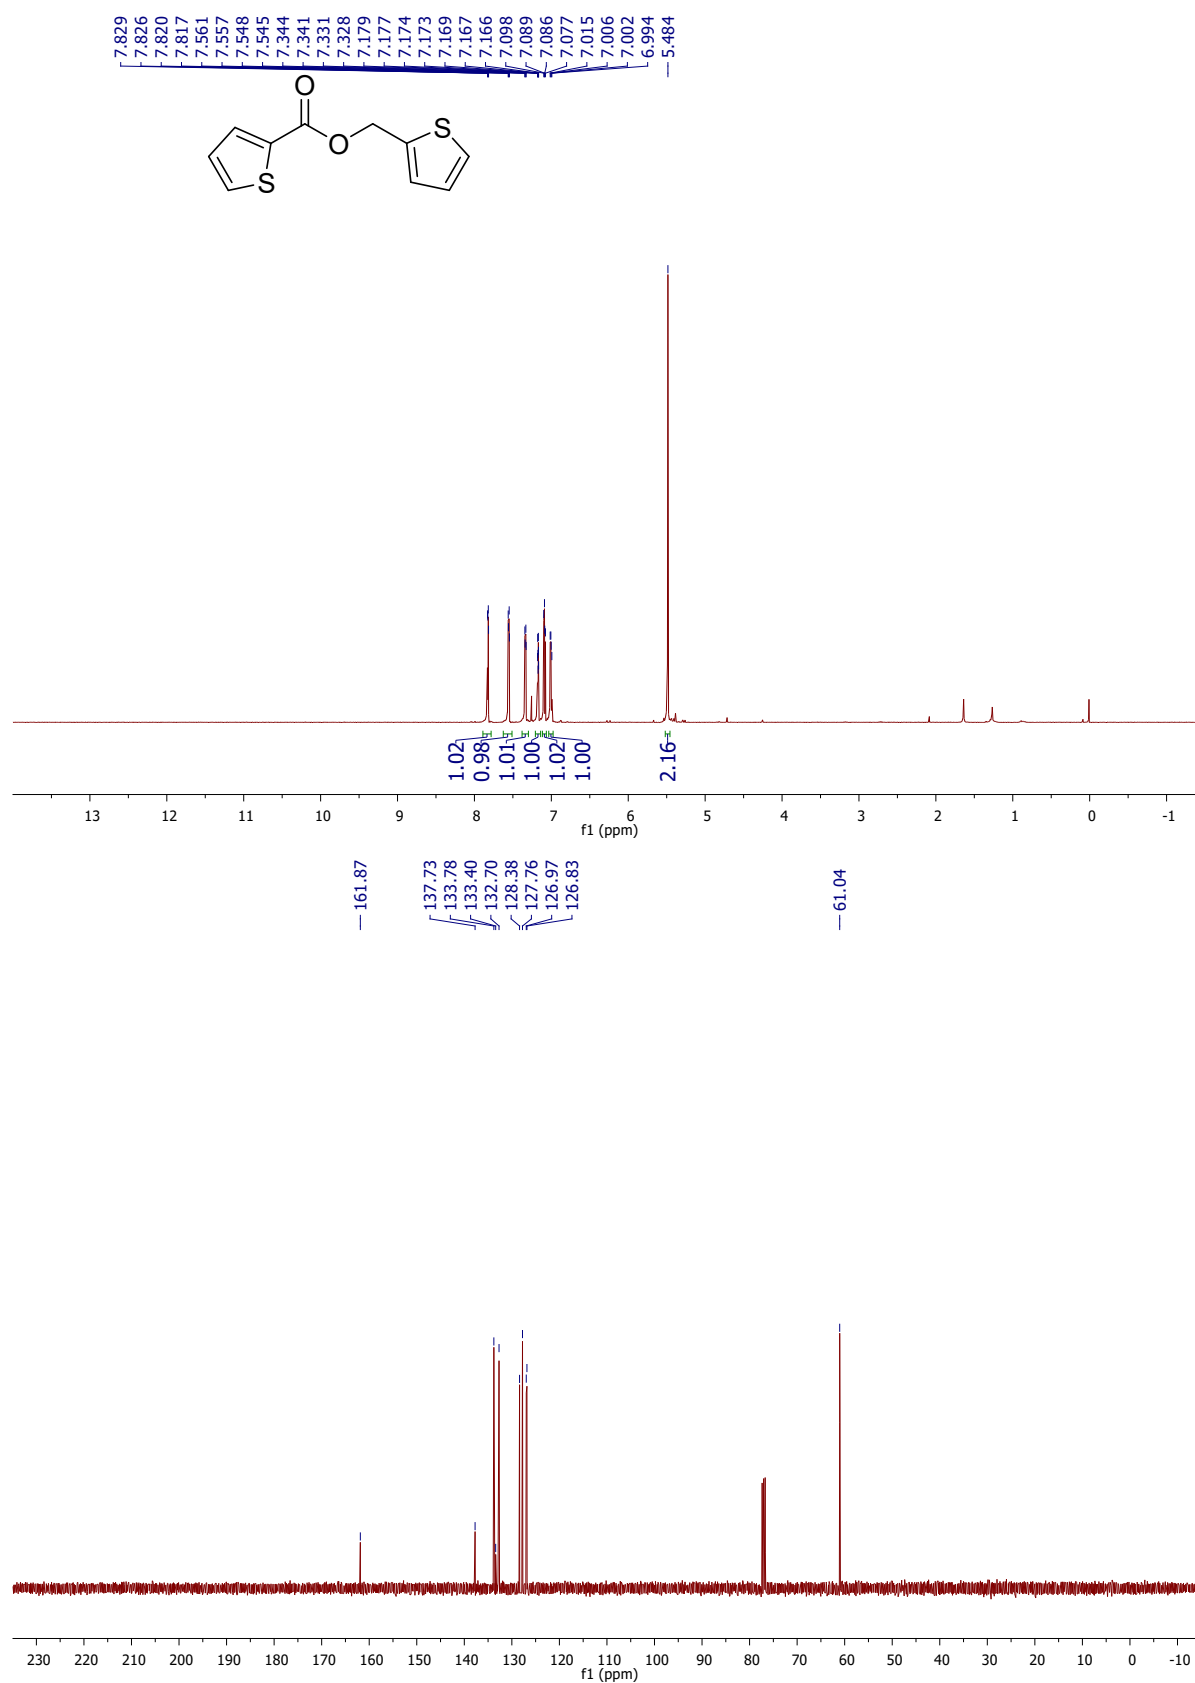

**Figure S35.** <sup>1</sup>H (400 MHz, CDCl<sub>3</sub>) and <sup>13</sup>C{<sup>1</sup>H} (100.6 MHz, CDCl<sub>3</sub>) NMR spectra of **6g**
